# Supplementary material for: Interactive tools for functional annotation of bacterial genomes
Source: Oxford University Press journal article supplement (doi:10.1093/database/baae089), 2024-01-01
Supplement: baae089_supp.zip [file baae089_supp.zip]

## Sheet: 500 genes with specific phenoty
orgId	locusId	sysName	original_annotation	condition	class	assigned_function
WCS417	GFF799	PS417_04060	peptide ABC transporter permease	Gly-Glu,Gly-Glu	transporter	dipeptide transporter
pseudo3_N2E3	AO353_11860	AO353_11860	Fis family transcriptional regulator	Potassium acetate,Sodium Fumarate dibasic,Sodium succinate dibasic hexahydrate,Sodium Fumarate dibasic,Sodium succinate dibasic hexahydrate,L-Malic acid disodium salt monohydrate,L-Malic acid disodium salt monohydrate	other
Keio	14279	b0133	pantoate--beta-alanine ligase (NCBI)	D-Glucose,D-Glucose,N-Acetyl-D-Glucosamine,N-Acetyl-D-Glucosamine,L-Glutamine,L-Glutamine,D-Serine,D-Serine,D-Alanine,D-Alanine,casamino acids,Adenosine,Adenosine,Cytidine,Cytidine,Ammonium chloride,Ammonium chloride,D-Galacturonic Acid monohydrate,D-Glucose,D-Galacturonic Acid monohydrate,D-Glucose	nonspec
pseudo1_N1B4	Pf1N1B4_1226		FIG01201438: hypothetical protein	Sucrose	other
pseudo1_N1B4	Pf1N1B4_2255		Gamma-glutamyl-GABA hydrolase (EC 3.5.1.94)	Sodium octanoate	nonspec
pseudo13_GW456_L13	PfGW456L13_3987		tRNA dihydrouridine synthase A	Putrescine Dihydrochloride	nonspec
psRCH2	GFF566	Psest_0571	Transcriptional regulators	L-Isoleucine,L-Isoleucine,L-Valine	nonspec
Koxy	BWI76_RS15135	BWI76_RS15135	hypothetical protein	Sodium D,L-Lactate	other
pseudo13_GW456_L13	PfGW456L13_2016		Aerobic C4-dicarboxylate transporter for fumarate, L-malate, D-malate, succunate, aspartate	Sodium succinate dibasic hexahydrate,L-Malic acid disodium salt monohydrate,Tween 20	transporter	C4-dicarboxylate transporter
BFirm	BPHYT_RS02520	BPHYT_RS02520	Fis family transcriptional regulator	Sodium succinate dibasic hexahydrate,L-Malic acid disodium salt monohydrate	other
Phaeo	GFF1707	PGA1_c17310	putative fatty acid desaturase	Sodium propionate	nonspec
pseudo3_N2E3	AO353_10815	AO353_10815	carbonate dehydratase	Potassium acetate,Potassium acetate	nonspec
Putida	PP_1401	PP_1401	C4-dicarboxylate transport transcriptional regulatory protein	a-Ketoglutaric acid disodium salt hydrate	other
psRCH2	GFF3724	Psest_3793	Glycine/D-amino acid oxidases (deaminating)	L-Alanine,D-Alanine,L-Alanine,L-Alanine,D-Alanine,D-Alanine,L-Alanine,L-Alanine,D-Alanine,D-Alanine,Putrescine Dihydrochloride	enzyme	D-alanine dehydrogenase (EC 1.4.99.-)
pseudo3_N2E3	AO353_18585	AO353_18585	phenylalanine 4-monooxygenase	L-Phenylalanine,L-Phenylalanine	enzyme	Phenylalanine 4-monooxygenase (EC 1.14.16.1)
pseudo5_N2C3_1	AO356_17550	AO356_17550	N-acetylglucosamine-6-phosphate deacetylase	N-Acetyl-D-Glucosamine	enzyme	N-acetylglucosamine-6-phosphate deacetylase (EC 3.5.1.25)
pseudo5_N2C3_1	AO356_17440	AO356_17440	nucleoid-associated protein	L-Lysine	other
Cup4G11	RR42_RS31785	RR42_RS31785	nitrite reductase	Sodium nitrate,Sodium nitrite	enzyme	Nitrite reductase (NAD(P)H) (EC 1.7.1.4)
Keio	18233	b4208	D-alanine/D-serine/glycine transporter (NCBI)	D-Galacturonic Acid monohydrate,D-Galacturonic Acid monohydrate,D-Glucose,D-Glucose	nonspec
Cola	Echvi_0403	Echvi_0403	Endoglucanase	L-Rhamnose monohydrate,L-Rhamnose monohydrate,L-Rhamnose monohydrate	nonspec
pseudo13_GW456_L13	PfGW456L13_161		putative membrane protein	Glycine	transporter	putative transporter, required for glycine utilization
pseudo13_GW456_L13	PfGW456L13_179		Putative esterase, FIGfam005057	Sodium octanoate	nonspec
BFirm	BPHYT_RS18580	BPHYT_RS18580	short-chain dehydrogenase	D-Alanine	nonspec
pseudo3_N2E3	AO353_21340	AO353_21340	myo-inosose-2 dehydratase	m-Inositol,m-Inositol	enzyme	Myo-inosose-2 dehydratase (EC 4.2.1.44)
Cup4G11	RR42_RS20305	RR42_RS20305	metal ABC transporter ATPase	Glycine	nonspec
Marino	GFF3193	HP15_3135	iron-containing alcohol dehydrogenase	Ethanol,Ethanol,D-Trehalose dihydrate	enzyme	ethanol oxidation regulatory protein ercA
SB2B	6936355	Sama_0544	outer membrane porin, putative (RefSeq)	a-Ketoglutaric acid disodium salt hydrate,a-Ketoglutaric acid disodium salt hydrate	nonspec
Smeli	SM_b20483	SM_b20483	catabolite repressor protein	L-Fucose,Uridine	other
Dino	3607308	Dshi_0723	Carbamoyl-phosphate synthase L chain ATP-binding (RefSeq)	Sodium propionate,Sodium propionate	enzyme	Propionyl-CoA carboxylase biotin-containing subunit (EC 6.4.1.3)
MR1	203162	SO4078	pmba protein (NCBI ptt file)	Sodium D,L-Lactate	other
Phaeo	GFF3393	PGA1_c34460	hypothetical protein	L-Glutamine,L-Glutamine	nonspec
Smeli	SM_b21124	SM_b21124	methylcrotonoyl-CoA carboxylase biotinylated subunit	L-Leucine	enzyme	3-methylcrotonyl-CoA carboxylase, alpha (biotin-containing) subunit (EC 6.4.1.4)
pseudo5_N2C3_1	AO356_15710	AO356_15710	GntR family transcriptional regulator	L-Histidine	other
pseudo3_N2E3	AO353_15995	AO353_15995	PTS mannose transporter subunit IIC	D-Trehalose dihydrate,D-Trehalose dihydrate	transporter	trehalose-specific PTS system, I, HPr, and IIA components
Cup4G11	RR42_RS15375	RR42_RS15375	AsnC family transcriptional regulator	L-Tryptophan,L-Tryptophan	other
Koxy	BWI76_RS15695	BWI76_RS15695	hypothetical protein	a-Cyclodextrin,a-Cyclodextrin	nonspec
pseudo5_N2C3_1	AO356_09645	AO356_09645	N-formimino-L-glutamate deiminase	L-Histidine,L-Histidine	enzyme	Formiminoglutamic iminohydrolase (EC 3.5.3.13)
MR1	201728	SO2588	protein-methionine-S-oxide reductase, PilB family (NCBI ptt file)	L-Isoleucine	nonspec
pseudo3_N2E3	AO353_11100	AO353_11100	acyl-CoA dehydrogenase	L-Valine	other
pseudo6_N2E2	Pf6N2E2_512		5-keto-2-deoxygluconokinase (EC 2.7.1.92) / uncharacterized domain	m-Inositol,m-Inositol	enzyme	5-dehydro-2-deoxygluconokinase (EC 2.7.1.92); possible 5-dehydro-2-deoxyphosphogluconate aldolase DUF2090 (EC 4.1.2.29)
Phaeo	GFF717	PGA1_c07320	sugar ABC transporter, ATP-binding protein	m-Inositol,m-Inositol,m-Inositol	transporter	Inositol transport system ATP-binding protein
pseudo1_N1B4	Pf1N1B4_1693		Cystine ABC transporter, periplasmic cystine-binding protein FliY	L-Methionine,Cytidine	nonspec
Koxy	BWI76_RS12370	BWI76_RS12370	hypothetical protein	a-Cyclodextrin,a-Cyclodextrin	nonspec
pseudo5_N2C3_1	AO356_05235	AO356_05235	glycerol-3-phosphate ABC transporter substrate-binding protein	Ethanol,N-Acetyl-D-Glucosamine	other
Putida	PP_3728	PP_3728	Sensor histidine kinase/response regulator	L-Arginine	other
Phaeo	GFF1010	PGA1_c10270	hypothetical protein	casamino acids	other
Putida	PP_2211	PP_2211	Transcriptional regulator, AraC family	DL-2-Aminobutyric acid,DL-2-Aminobutyric acid,L-Isoleucine,L-Isoleucine	other
Cola	Echvi_3406	Echvi_3406	TonB-dependent siderophore receptor	L-Serine	nonspec
psRCH2	GFF2308	Psest_2356	Fatty acid desaturase	L-Arginine,L-Citrulline,L-Citrulline	nonspec
Phaeo	GFF2753	PGA1_c27960	putative oxidoreductase	N-Acetyl-D-Glucosamine,N-Acetyl-D-Glucosamine,N-Acetyl-D-Glucosamine	nonspec	role unknown
pseudo5_N2C3_1	AO356_20280	AO356_20280	2-dehydro-3-deoxygalactonokinase	D-Galactose	enzyme	2-dehydro-3-deoxygalactonokinase DgoK (EC 2.7.1.58)
pseudo6_N2E2	Pf6N2E2_4704		Predicted L-lactate dehydrogenase, Iron-sulfur cluster-binding subunit YkgF	Carnitine Hydrochloride,Carnitine Hydrochloride,Glycine	enzyme	DgcB Dimethylglycine demethylase subunit B (EC 1.5.3.-)
Cola	Echvi_2512	Echvi_2512	phospho-2-dehydro-3-deoxyheptonate aldolase	L-Phenylalanine,L-Phenylalanine	nonspec
HerbieS	HSERO_RS20590	HSERO_RS20590	enoyl-CoA hydratase	Phenylacetic acid,Phenylacetic acid	enzyme	fused 3-oxo-5,6-dehydrosuberyl-CoA semialdehyde dehydrogenase and oxepin-CoA hydrolase (EC 3.3.2.12; EC 1.2.1.91; EC 4.2.1.55)
azobra	AZOBR_RS03325	AZOBR_RS03325	hypothetical protein	Glycerol,Glycerol	nonspec
pseudo6_N2E2	Pf6N2E2_496		Dihydropyrimidine dehydrogenase [NADP+] (EC 1.3.1.2)	Uridine,Cytosine,Uridine,Cytosine	enzyme	Dihydropyrimidine dehydrogenase (NADP(+)) (EC 1.3.1.2)
DvH	207693	DVU2209	conserved hypothetical protein (TIGR)	L-Alanine	nonspec
pseudo6_N2E2	Pf6N2E2_2847		Glutamate synthase [NADPH] large chain (EC 1.4.1.13)	Putrescine Dihydrochloride	nonspec
Korea	Ga0059261_0152	Ga0059261_0152	Protein of unknown function (DUF2794)	L-Glutamine	nonspec
Putida	PP_2323	PP_2323	conserved protein of unknown function	L-Leucine	nonspec
DvH	209488	DVU0549	high-affinity branched-chain amino acid ABC transporter, permease protein (TIGR)	L-Glutamine,L-Glutamine,L-Threonine,L-Proline,L-Proline,L-Proline,L-Arginine	transporter	proline and maybe arginine uptake
Keio	17665	b3604	DNA-binding transcriptional repressor (NCBI)	Sodium D-Lactate,Sodium D-Lactate,Sodium D,L-Lactate,Sodium D,L-Lactate	other
ANA3	7026258	Shewana3_3400	phosphoribulokinase/uridine kinase (RefSeq)	Glycine,Glycine	nonspec
pseudo13_GW456_L13	PfGW456L13_3909		Ribose operon repressor	L-Arabinose,L-Arabinose,Gly-DL-Asp	nonspec
MR1	203724	SO4654	sulfate ABC transporter, permease protein (NCBI ptt file)	Sodium D,L-Lactate	nonspec
Putida	PP_2329	PP_2329	aminodeoxychorismate synthase / para-aminobenzoate synthase multi-enzyme complex	L-Phenylalanine,L-Phenylalanine	nonspec
pseudo5_N2C3_1	AO356_26025	AO356_26025	glycogen synthase	Cytidine	nonspec
pseudo5_N2C3_1	AO356_19660	AO356_19660	hypothetical protein	Sodium D-Lactate	nonspec	pyruvate transporter?
pseudo6_N2E2	Pf6N2E2_2376		Nitrate/nitrite transporter	Sodium nitrate,Sodium nitrate	transporter	nitrate transporter only, probably (see B.subtilis nasA, defect on nitrate only, like this)
Btheta	351860	BT2332	conserved hypothetical protein (NCBI ptt file)	amylopectin from maize,L-Aspartic Acid	other
Btheta	349800	BT0272	putative outer membrane protein, probably involved in nutrient binding (NCBI ptt file)	(+)-Arabinogalactan,(+)-Arabinogalactan	transporter	TonB-dependent receptor for (+)-arabinogalactan (SusC-like)
Btheta	352054	BT2526	hypothetical protein (NCBI ptt file)	Hyaluronic acid sodium salt from Streptococcus equi,Hyaluronic acid sodium salt from Streptococcus equi,Hyaluronic acid sodium salt from Streptococcus equi	other
Putida	PP_0294	PP_0294	choline / betaine / carnitine ABC transporter - ATP binding subunit	Choline chloride,Choline chloride,Carnitine Hydrochloride,Carnitine Hydrochloride	transporter	transport of carnitine & choline (and probably betaine as well), ATPase component
acidovorax_3H11	Ac3H11_968		Cytochrome c oxidase subunit CcoN (EC 1.9.3.1)	L-Isoleucine,D-Alanine,Ammonium chloride	nonspec
Caulo	CCNA_00650	CCNA_00650	MFS superfamily nitrate/nitrite transporter NarK	Sodium nitrate,Sodium nitrate	transporter	prob. Nitrate transport only (similar to nasA) but could be nitrate/nitrite antiporter (29% id to Q9RA46)
PV4	5207583	Shew_0117	protoheme IX farnesyltransferase (RefSeq)	L-Glutamine	nonspec
Smeli	SMc00832	SMc00832	glycolate oxidase subunit protein	Sodium D,L-Lactate	enzyme	D-lactate dehydrogenase, FAD-linked subunit GlcD (EC 1.1.99.6)
Putida	PP_3713	PP_3713	catechol 1,2-dioxygenase	benzoic acid	enzyme	Catechol 1,2-dioxygenase (EC 1.13.11.1)
pseudo6_N2E2	Pf6N2E2_4337		Uncharacterized protein ImpI/VasC	L-Serine,L-Serine	other
pseudo6_N2E2	Pf6N2E2_1678		Major facilitator family transporter	Cytidine,Cytidine	nonspec
ANA3	7025965	Shewana3_3113	sugar isomerase (SIS) (RefSeq)	N-Acetyl-D-Glucosamine,D-Glucosamine Hydrochloride,N-Acetyl-D-Glucosamine,D-Glucosamine Hydrochloride	enzyme	Glucosamine-6-phosphate deaminase [isomerizing], alternative (EC 3.5.99.6)
pseudo5_N2C3_1	AO356_09615	AO356_09615	ABC transporter permease	L-Histidine	transporter	ABC transporter for L-Histidine, permease component
pseudo13_GW456_L13	PfGW456L13_1738		Ferric iron ABC transporter, ATP-binding protein	Sodium D-Lactate	nonspec	Fe(III) uptake
pseudo5_N2C3_1	AO356_07325	AO356_07325	PTS fructose transporter subunit IIBC	D-Fructose,D-Fructose	transporter	fructose PTS, IIB/IIC components
WCS417	GFF1090	PS417_05530	membrane protein	Inosine,Urea	nonspec	apparently involved in alginate synthesis, thought it might be a urea transporter but phenotype is not so conserved
pseudo3_N2E3	AO353_05990	AO353_05990	methylmalonate-semialdehyde dehydrogenase	L-Valine	enzyme	Methylmalonate-semialdehyde dehydrogenase (EC 1.2.1.27)
pseudo1_N1B4	Pf1N1B4_1240		LysR family transcriptional regulator PA0133	Uridine,Uridine	other
pseudo6_N2E2	Pf6N2E2_6061		Methylisocitrate lyase (EC 4.1.3.30)	Sodium propionate,L-Isoleucine,Sodium propionate,L-Isoleucine,L-Isoleucine	enzyme	Methylisocitrate lyase (EC 4.1.3.30)
Koxy	BWI76_RS15590	BWI76_RS15590	hypothetical protein	a-Cyclodextrin,a-Cyclodextrin	nonspec
BFirm	BPHYT_RS15715	BPHYT_RS15715	ATP-dependent Clp protease adapter protein ClpS	Deoxyribonucleic acid from herring sperm	nonspec
WCS417	GFF1424	PS417_07240	GntR family transcriptional regulator	2-Deoxy-D-Ribose,2-Deoxy-D-Ribose,2-Deoxy-D-ribonic acid lithium salt,2-Deoxy-D-ribonic acid lithium salt	other
MR1	201736	SO2596	conserved hypothetical protein (NCBI ptt file)	L-Isoleucine	other
pseudo3_N2E3	AO353_05935	AO353_05935	kynureninase	L-Tryptophan,L-Tryptophan	enzyme	Kynureninase (EC 3.7.1.3)
Pedo557	CA265_RS06575	CA265_RS06575	MFS transporter	L-Valine	nonspec	may be a valine transporter, but not weak phenotype is not conserved, and also a phenotype on D-cycloserine stress
Putida	PP_3492	PP_3492	short-chain acyl-CoA dehydrogenase	L-Valine,L-Valine	enzyme	isobutyryl-CoA dehydrogenase (EC 1.3.8.5) (modest phenotype, but conserved, and some homologs have a much stronger phenotype)
psRCH2	GFF561	Psest_0566	urea ABC transporter, permease protein UrtB	Parabanic Acid,Parabanic Acid,Parabanic Acid	transporter	urea transporter (parabanic acid might be hydrolyzed before transport?)
pseudo3_N2E3	AO353_01225	AO353_01225	ABC transporter substrate-binding protein	Sodium propionate	nonspec
Korea	Ga0059261_2421	Ga0059261_2421	Sterol desaturase	L-Glutamine	nonspec
Caulo	CCNA_02548	CCNA_02548	hypothetical protein	D-Mannose	other
pseudo6_N2E2	Pf6N2E2_5403		Glutamate Aspartate transport system permease protein GltJ (TC 3.A.1.3.4)	L-Histidine,D-Alanine,L-Histidine,D-Alanine,L-Histidine,L-Isoleucine,L-Histidine,L-Serine	transporter	ABC transporter for D-Alanine, permease component 2; may also uptake histidine
Cola	Echvi_1890	Echvi_1890	molybdenum cofactor synthesis domain	Sodium nitrate,Sodium nitrate	enzyme	this must be moeA, molybdopterin molybdotransferase (EC 2.10.1.1); there’s another protein with this domain but no relevant phenotypes (molybdenum cofactor is required for nitrate reduction)
Keio	17660	b3599	fused mannitol-specific PTS enzymes: IIA components/IIB components/IIC components (NCBI)	D-Mannitol,D-Mannitol,D-Mannitol,D-Mannitol,D-Mannitol,D-Mannitol	transporter	Mannitol PTS IIA/IIB/IIC
DvH	208420	DVU2910	membrane protein, putative (TIGR)	Putrescine Dihydrochloride,Putrescine Dihydrochloride,spermidine,N2	nonspec
HerbieS	HSERO_RS23235	HSERO_RS23235	GntR family transcriptional regulator	m-Inositol	other
DvH	208171	DVU2672	membrane protein, putative (TIGR)	Glycine,Glycine,Glycine	transporter	glycine transporter
Cola	Echvi_3375	Echvi_3375	Predicted dehydrogenases and related proteins	D-Salicin,D-Salicin	enzyme	predicted 3-ketohexose reductase
Koxy	BWI76_RS08815	BWI76_RS08815	cyclic pyranopterin phosphate synthase	L-Threonine,Thymidine,L-Threonine,Thymine	nonspec
WCS417	GFF5296	PS417_27115	transporter	Putrescine Dihydrochloride,Putrescine Dihydrochloride,Putrescine Dihydrochloride	transporter	putrescine transporter
pseudo13_GW456_L13	PfGW456L13_1869		Glycine cleavage system H protein	L-Threonine	enzyme	glycine cleavage system H protein
Koxy	BWI76_RS11485	BWI76_RS11485	serine protein kinase PrkA	L-Lysine,L-Tryptophan,L-Lysine,L-Tryptophan	other
pseudo1_N1B4	Pf1N1B4_4622		Nitrate/nitrite transporter	L-Arabinose,L-Arabinose	nonspec	? (there’s an ABC transporter for L-arabinose, so what is this for ?)
pseudo6_N2E2	Pf6N2E2_2629		Phenylalanine hydroxylase transcriptional activator PhhR	L-Phenylalanine,L-Phenylalanine,L-Phenylalanine,L-Phenylalanine	other
HerbieS	HSERO_RS22235	HSERO_RS22235	short-chain dehydrogenase	Xylitol,Xylitol	enzyme	rhamnulose-1-phosphate aldolase (EC 4.1.2.19) / lactaldehyde dehydrogenase (EC 1.2.1.22)
pseudo13_GW456_L13	PfGW456L13_2862		Bacteriophage N4 adsorption protein A	Trisodium citrate dihydrate	other
Smeli	SM_b21107	SM_b21107	mandelate racemase or evolutionary related enzyme of the mandelate racemase muconate lactonizing enzyme family protein	L-Fucose	other	dehydratase involved in L-fucose catabolism
Caulo	CCNA_03502	CCNA_03502	YceI/cytochrome b561 periplasmic protein	Putrescine Dihydrochloride,Putrescine Dihydrochloride	other
psRCH2	GFF2790	Psest_2846	monovalent cation/proton antiporter, MnhG/PhaG subunit	Trisodium citrate dihydrate,Sodium succinate dibasic hexahydrate,Sodium succinate dibasic hexahydrate	nonspec
pseudo6_N2E2	Pf6N2E2_4581		FIG015547: peptidase, M16 family	D-Galactose,D-Galactose	other
pseudo3_N2E3	AO353_07665	AO353_07665	serine hydroxymethyltransferase	Carnitine Hydrochloride,Carnitine Hydrochloride,L-Threonine,L-Threonine	enzyme	Serine hydroxymethyltransferase
BFirm	BPHYT_RS04055	BPHYT_RS04055	PST family polysaccharide export protein	D-Xylose,Xylitol,L-Isoleucine,2-Deoxyadenosine 5-monophosphate	other
Putida	PP_4038	PP_4038	NADP-dependent dihydropyrimidine dehydrogenase subunit PreA	3-aminobutyric acid,3-aminobutyric acid,Uracil,Uracil	enzyme	Dihydropyrimidine dehydrogenase (NADP(+)) (EC 1.3.1.2); phenotype on 3-aminobutyrate is not explained
Cola	Echvi_1015	Echvi_1015	Retron-type reverse transcriptase	D-Raffinose pentahydrate	other
BFirm	BPHYT_RS05480	BPHYT_RS05480	NAD synthetase	L-Proline	nonspec
psRCH2	GFF204	Psest_0205	outer membrane porin, OprD family.	Trisodium citrate dihydrate,Trisodium citrate dihydrate	transporter	tricarboxylate porin
pseudo13_GW456_L13	PfGW456L13_2986		3-hydroxyisobutyryl-CoA hydrolase (EC 3.1.2.4)	L-Valine,L-Valine,L-Valine	enzyme	3-hydroxyisobutyryl-CoA hydrolase (EC 3.1.2.4)
HerbieS	HSERO_RS05205	HSERO_RS05205	dihydroxy-acid dehydratase	L-Arabinose,L-Arabinose	enzyme	L-arabonate dehydratase (EC 4.2.1.25)
MR1	202526	SO3419	trp operon repressor (NCBI ptt file)	Uridine,Cytidine,Uridine,Cytidine,L-Serine	other
pseudo13_GW456_L13	PfGW456L13_3570		FIG00960995: hypothetical protein	Tween 20	other
pseudo13_GW456_L13	PfGW456L13_2740		Benzoate 1,2-dioxygenase alpha subunit (EC 1.14.12.10)	L-Tryptophan,L-Tryptophan	enzyme	Anthranilate 1,2-dioxygenase (deaminating, decarboxylating) (EC 1.14.12.1)
Phaeo	GFF372	PGA1_c03830	putative regulatory protein, H-NS histone family	Sodium propionate	other
Keio	17057	b2979	glycolate oxidase subunit, FAD-linked (NCBI)	Glycolic Acid,Glycolic Acid	enzyme	glycolate dehydrogenase, putative FAD-linked subunit
pseudo13_GW456_L13	PfGW456L13_3031		Threonine dehydratase biosynthetic (EC 4.3.1.19)	L-Valine,L-Valine,L-Valine	nonspec	indirect effect of valine on ile synth?
Cola	Echvi_2472	Echvi_2472	The (Largely Gram-negative Bacterial) Hydrophobe/Amphiphile Efflux-1 (HAE1) Family	L-tyrosine disodium salt,L-tyrosine disodium salt	other
DvH	207512	DVU2039	hypothetical protein (TIGR)	L-Lysine	other
pseudo5_N2C3_1	AO356_07960	AO356_07960	LysR family transcriptional regulator	Uridine,Thymine	other
HerbieS	HSERO_RS16815	HSERO_RS16815	C4-dicarboxylate ABC transporter	a-Ketoglutaric acid disodium salt hydrate,a-Ketoglutaric acid disodium salt hydrate	other
Putida	PP_1170	PP_1170	Gluconolactonase	D-Glucuronic Acid,D-Galacturonic Acid monohydrate	enzyme	D-glucaro-1,5-lactonase UxuL
pseudo3_N2E3	AO353_00345	AO353_00345	NADPH-dependent 7-cyano-7-deazaguanine reductase	Potassium acetate	nonspec
Caulo	CCNA_02981	CCNA_02981	AsnC-family transcriptional regulator	L-Tryptophan,L-Tryptophan	other
pseudo5_N2C3_1	AO356_13160	AO356_13160	ABC transporter substrate-binding protein	Putrescine Dihydrochloride	transporter	SBP for putrescine (possibly spermidine too, given homolog in P.aeruginosa)
Putida	PP_4779	PP_4779	AMP nucleosidase	Levulinic Acid,Levulinic Acid,3-methyl-1-butanol,3-methyl-1-butanol,DL-2-Aminobutyric acid,DL-2-Aminobutyric acid	nonspec
psRCH2	GFF2390	Psest_2438	3-hydroxyisobutyrate dehydrogenase	L-Valine,L-Valine	enzyme	3-hydroxyisobutyrate dehydrogenase (EC 1.1.1.31)
pseudo5_N2C3_1	AO356_02990	AO356_02990	molybdenum cofactor guanylyltransferase	L-Histidine,L-Histidine	nonspec	prob. MoeA, but why on histidine ?
WCS417	GFF3412	PS417_17460	quinonprotein alcohol dehydrogenase	Ethanol,L-Arginine,Ethanol,L-Arginine,L-Citrulline,L-Citrulline	enzyme	ethanol dehydrogenase (and maybe other primary alcohols)
Btheta	354263	BT4737	pyruvate formate-lyase activating enzyme (NCBI ptt file)	L-Aspartic Acid	nonspec
pseudo3_N2E3	AO353_17195	AO353_17195	3-oxoadipate--succinyl-CoA transferase	L-Tryptophan	enzyme	3-oxoadipate CoA-transferase (EC 2.8.3.6)
BFirm	BPHYT_RS34660	BPHYT_RS34660	DNA-binding protein	Deoxyribonucleic acid from herring sperm	other
pseudo5_N2C3_1	AO356_09910	AO356_09910	ABC transporter permease	L-Lysine,L-Lysine	transporter	ABC transporter for L-Lysine, permease component 2
pseudo6_N2E2	Pf6N2E2_5488		C4-dicarboxylate transport sensor protein	a-Ketoglutaric acid disodium salt hydrate,a-Ketoglutaric acid disodium salt hydrate	other
pseudo3_N2E3	AO353_03085	AO353_03085	phospholipase	L-Ornithine,L-Ornithine,L-Citrulline	nonspec
pseudo1_N1B4	Pf1N1B4_2206		FIG139438: lipoprotein B	Sodium octanoate	other
Keio	17604	b3543	dipeptide transporter (NCBI)	Gly-DL-Asp,Gly-DL-Asp,Gly-Glu,Gly-Glu	transporter	dipeptide ABC transporter membrane subunit DppB
Putida	PP_3721	PP_3721	Arginine--pyruvate transaminase AruH	L-Arginine	enzyme	arginine:pyruvate transaminase [EC: 2.6.1.84]
SB2B	6938573	Sama_2676	bifunctional proline dehydrogenase/pyrroline-5-carboxylate dehydrogenase (RefSeq)	Gelatin,L-Proline,L-Proline	enzyme	L-glutamate gamma-semialdehyde dehydrogenase (EC 1.2.1.88); Proline dehydrogenase (EC 1.5.5.2)
pseudo6_N2E2	Pf6N2E2_4165		Zinc ABC transporter, periplasmic-binding protein ZnuA	Sodium D-Lactate,Sodium pyruvate,Sodium D-Lactate	other
MR1	203457	SO4379	hypothetical protein (NCBI ptt file)	Sodium D,L-Lactate	other
Putida	PP_1067	PP_1067	Sensor histidine kinase	L-Glutamic acid monopotassium salt monohydrate,DL-2-Aminobutyric acid,DL-2-Aminobutyric acid,L-Glutamic acid monopotassium salt monohydrate,L-Glutamic acid monopotassium salt monohydrate	other
Dyella79	N515DRAFT_3391	N515DRAFT_3391	Glycosidase	a-Cyclodextrin,a-Cyclodextrin	enzyme	Alpha-amylase (EC 3.2.1.1)
DvH	207371	DVU1903	transcription-repair coupling factor (TIGR)	N,N,N′,N′-Tetramethylethylenediamine,N,N,N′,N′-Tetramethylethylenediamine	other
pseudo13_GW456_L13	PfGW456L13_3540		Branched-chain alpha-keto acid dehydrogenase, E1 component, alpha subunit (EC 1.2.4.4)	L-Valine,L-Valine,L-Valine,L-Isoleucine	enzyme	branched-chain alpha-ketoacid dehydrogenase, E1 component alpha subunit (EC 1.2.4.4)
Putida	PP_2683	PP_2683	putative sensory box histidine kinase/response regulator	1-Pentanol	other
WCS417	GFF3796	PS417_19435	membrane protein	Inosine,Inosine,Inosine,Deoxyribonucleic acid from herring sperm,Deoxyribonucleic acid from herring sperm,Deoxyribonucleic acid from herring sperm	enzyme	urate hydroxylase
DvH	208862	DVU3336	potassium channel histidine kinase domain protein/universal stress protein (TIGR)	L-Cysteine,L-Cysteine,L-Cysteine	other
pseudo3_N2E3	AO353_14460	AO353_14460	competence protein TfoX	L-Ornithine,L-Ornithine,L-Citrulline,D-Glucose,L-Ornithine,L-Ornithine,L-Citrulline,L-Citrulline,D-Glucose	nonspec
azobra	AZOBR_RS10760	AZOBR_RS10760	chemotaxis protein	a-Ketoglutaric acid disodium salt hydrate,a-Ketoglutaric acid disodium salt hydrate,D-Gluconic Acid sodium salt	other
pseudo6_N2E2	Pf6N2E2_3243		FIG067310: hypothetical protein	Tween 20,Tween 20	other
Korea	Ga0059261_1647	Ga0059261_1647	PTS system, N-acetylglucosamine-specific IIBC component	N-Acetyl-D-Glucosamine,N-Acetyl-D-Glucosamine	transporter	PTS system, N-acetylglucosamine-specific IIBC component
MR1	201539	SO2395	acyl-CoA dehydrogenase family protein (NCBI ptt file)	Tween 20,Tween 20	enzyme	Acyl-CoA dehydrogenase (EC 1.3.8.7) (but not sure about preferred substrate length)
Putida	PP_0386	PP_0386	Sensory box protein	a-Ketoglutaric acid disodium salt hydrate	other
SB2B	6938178	Sama_2299	response regulator receiver protein (RefSeq)	L-Arginine	other
pseudo1_N1B4	Pf1N1B4_1555		Polyhydroxyalkanoic acid synthase	D-Glucosamine Hydrochloride	nonspec
Cola	Echvi_3483	Echvi_3483	tRNA (guanine-N(7)-)-methyltransferase	L-tyrosine disodium salt,L-tyrosine disodium salt	nonspec
HerbieS	HSERO_RS04870	HSERO_RS04870	ABC transporter substrate-binding protein	Glycerol	transporter	glycerol transporter SBP
MR1	203177	SO4093	conserved hypothetical protein (NCBI ptt file)	Tween 20,Tween 20	other
ANA3	7025492	Shewana3_2646	phage shock protein C, PspC (RefSeq)	Glycine	other
acidovorax_3H11	Ac3H11_2911		ABC transporter, periplasmic substrate-binding protein	L-tyrosine disodium salt	nonspec
BFirm	BPHYT_RS15795	BPHYT_RS15795	hypothetical protein	D-Glucosamine Hydrochloride	nonspec
Koxy	BWI76_RS24235	BWI76_RS24235	aminotransferase	L-Leucine,L-Leucine	enzyme	Branched-chain-amino-acid transaminase (EC 2.6.1.42)
BFirm	BPHYT_RS22245	BPHYT_RS22245	sodium:solute symporter	Sodium pyruvate,D-Alanine,2-Deoxyadenosine 5-monophosphate,Deoxyribonucleic acid from herring sperm	transporter	MctP, transporter for D-alanine, D-lactate, pyruvate
pseudo13_GW456_L13	PfGW456L13_3503		Beta-ureidopropionase (EC 3.5.1.6)	Uridine,Cytosine	enzyme	Beta-ureidopropionase (EC 3.5.1.6)
Cup4G11	RR42_RS32065	RR42_RS32065	protocatechuate 3,4-dioxygenase	4-Hydroxybenzoic Acid,4-Hydroxybenzoic Acid	enzyme	protocatechuate 3,4-dioxygenase, beta subunit [EC: 1.13.11.3]
psRCH2	GFF4193	Psest_4266	Signal transduction histidine kinase regulating C4-dicarboxylate transport system	Sodium Fumarate dibasic,Sodium Fumarate dibasic,Sodium succinate dibasic hexahydrate,Sodium succinate dibasic hexahydrate	other
acidovorax_3H11	Ac3H11_487		Molybdenum cofactor biosynthesis protein MoaA	L-tyrosine disodium salt	nonspec
pseudo1_N1B4	Pf1N1B4_5116		Sucrose-6-phosphate hydrolase (EC 3.2.1.B3)	Sucrose,Sucrose,Sucrose,Sucrose,Sucrose,Sucrose,Sucrose	enzyme	Sucrose alpha-glucosidase (EC 3.2.1.48)
PS	Dsui_3160	Dsui_3160	response regulator	a-Ketoglutaric acid disodium salt hydrate,a-Ketoglutaric acid disodium salt hydrate	other
Korea	Ga0059261_1166	Ga0059261_1166	Beta-glucosidase-related glycosidases	D-Cellobiose,D-Cellobiose,D-Cellobiose,D-Cellobiose	enzyme	Beta-glucosidase (EC 3.2.1.21)
Keio	14343	b0197	DL-methionine transporter subunit (NCBI)	Potassium acetate,Glycolic Acid	nonspec
HerbieS	HSERO_RS07015	HSERO_RS07015	isocitrate dehydrogenase	Sodium pyruvate	nonspec
psRCH2	GFF85	Psest_0085	TRAP transporter solute receptor, TAXI family	a-Ketoglutaric acid disodium salt hydrate,a-Ketoglutaric acid disodium salt hydrate	transporter	alpha-ketoglutarate TRAP transporter, solute receptor component
psRCH2	GFF4196	Psest_4269	TRAP-type C4-dicarboxylate transport system, small permease component	a-Ketoglutaric acid disodium salt hydrate,Sodium Fumarate dibasic,Sodium Fumarate dibasic,Sodium succinate dibasic hexahydrate,Sodium succinate dibasic hexahydrate	transporter	C4-dicarboxylate transporter, DctQ subunit
pseudo5_N2C3_1	AO356_18340	AO356_18340	leucyl-tRNA synthetase	Ethanol,Ethanol	other
pseudo6_N2E2	Pf6N2E2_2630		Phenylalanine-4-hydroxylase (EC 1.14.16.1)	L-Phenylalanine,L-Phenylalanine,L-Phenylalanine,L-Phenylalanine	enzyme	Phenylalanine 4-monooxygenase (EC 1.14.16.1)
Cola	Echvi_0808	Echvi_0808	hypothetical protein	L-Methionine,L-Arginine,L-Methionine,L-Citrulline	other
pseudo13_GW456_L13	PfGW456L13_4895		FIG067310: hypothetical protein	Sodium octanoate	other
Phaeo	GFF712	PGA1_c07270	putative iolE/mocC family protein	m-Inositol,m-Inositol,m-Inositol	enzyme	Myo-inosose-2 dehydratase (EC 4.2.1.44)
Keio	18048	b4020	predicted transporter (NCBI)	Glycolic Acid,Glycolic Acid	nonspec	(not clear what its role is)
pseudo13_GW456_L13	PfGW456L13_3649		D-serine permease DsdX	D-Serine,D-Serine,D-Serine	transporter	D-serine permease
Keio	1937204	b3996	NADH pyrophosphatase (NCBI)	Potassium acetate	nonspec
Koxy	BWI76_RS15595	BWI76_RS15595	hypothetical protein	a-Cyclodextrin,a-Cyclodextrin,2'-Deoxycytidine,2'-Deoxycytidine	nonspec
Marino	GFF3261	HP15_3203	proline aminopeptidase P II	Ethanol,Ethanol	nonspec
Putida	PP_0615	PP_0615	Branched-chain amino acid ABC transporter, ATP-binding protein	Hydantoin	nonspec
pseudo6_N2E2	Pf6N2E2_5945		Similar to phosphoglycolate phosphatase, clustered with ribosomal large subunit pseudouridine synthase C	Glycine	nonspec
Smeli	SM_b21217	SM_b21217	sugar kinase	D-Glucosamine Hydrochloride	enzyme	glucosamine kinase (EC 2.7.1.8)
Caulo	CCNA_01194	CCNA_01194	TonB-dependent receptor	D-Raffinose pentahydrate,D-Raffinose pentahydrate	transporter	TonB-dependent receptor for sucrose (sucA, see PMID:30054816) and raffinose (raffinose is probably cleaved in the cytoplasm by CCNA_02368)
DvH	207262	DVU1797	dimethyladenosine transferase (TIGR)	L-Alanine,L-Alanine,L-Alanine,N2,N2,N2,L-Arginine,L-Arginine,L-Arginine,Putrescine Dihydrochloride,Putrescine Dihydrochloride,Putrescine Dihydrochloride,spermidine	other
Dino	3607309	Dshi_0724	hypothetical protein (RefSeq)	Sodium propionate,Sodium propionate	other
pseudo5_N2C3_1	AO356_04810	AO356_04810	phospholipase	Potassium acetate	other
Keio	14417	b0279	CP4-6 prophage; predicted protein (NCBI)	Glycolic Acid	other
Keio	15311	b1189	D-amino acid dehydrogenase small subunit (NCBI)	D-Alanine,D-Alanine	enzyme	D-amino acid dehydrogenase small subunit
psRCH2	GFF622	Psest_0636	Predicted soluble lytic transglycosylase fused to an ABC-type amino acid-binding protein	Sodium butyrate	other
Dyella79	N515DRAFT_2291	N515DRAFT_2291	Fe(3+) dicitrate transport protein	L-Asparagine,D-Glucosamine Hydrochloride,Glucuronamide	other
WCS417	GFF335	PS417_01705	N-formimino-L-glutamate deiminase	L-Histidine,L-Valine,L-Histidine	enzyme	Formiminoglutamic iminohydrolase (EC 3.5.3.13)
Btheta	349687	BT0159	conserved hypothetical protein (NCBI ptt file)	Mannan from Saccharomyces cerevisiae	other
Putida	PP_2448	PP_2448	gamma-glutamylputrescine oxidase	Propandiamine,Propandiamine,Putrescine Dihydrochloride,Putrescine Dihydrochloride	enzyme	Gamma-glutamylputrescine oxidase
SB2B	6937894	Sama_2035	ATP-dependent protease La (RefSeq)	L-Glutamine,Gly-Glu	other
Phaeo	GFF2923	PGA1_c29700	glycolate oxidase iron-sulfur subunit	Sodium D-Lactate,Sodium D,L-Lactate,Sodium D-Lactate,Sodium D,L-Lactate,Sodium D,L-Lactate,Sodium D,L-Lactate	enzyme	D-lactate dehydrogenase, iron-sulfur subunit GlcF (EC 1.1.99.6)
MR1	10942692	SO_2304		Gelatin,Gelatin,L-Alanine,L-Alanine	other
pseudo3_N2E3	AO353_07780	AO353_07780	glycine/betaine ABC transporter substrate-binding protein	Carnitine Hydrochloride	transporter	carnitine SBP
Putida	PP_4831	PP_4831	putative cobalt-precorrin-6A synthase	3-methyl-1-butanol,3-methyl-1-butanol	other
Btheta	353224	BT3698	alpha-amylase, susG (NCBI ptt file)	polygalacturonic acid,amylopectin from maize,amylopectin from maize,Starch,amylopectin from maize,amylopectin from maize,Starch,Starch	enzyme	Alpha-amylase susG
DvH	209646	DVUA0074	sulfotransferase family protein (TIGR)	N2,spermidine	other
pseudo5_N2C3_1	AO356_00020	AO356_00020	sugar ABC transporter permease	D-Sorbitol,D-Sorbitol	transporter	ABC transporter for D-Sorbitol, permease component 2
MR1	200295	SO1115	aminoacyl-histidine dipeptidase (NCBI ptt file)	Gly-DL-Asp,Gly-DL-Asp	enzyme	dipeptidase
acidovorax_3H11	Ac3H11_501		ABC-type multidrug transport system, permease component	L-Threonine	other
Koxy	BWI76_RS19555	BWI76_RS19555	PTS beta-glucoside transporter subunit EIIBCA	D,L-Malic Acid,D-Salicin,D,L-Malic Acid	transporter	Beta-glucoside PTS, IIA/B/C components
Phaeo	GFF3165	PGA1_c32160	Predicted sulfurtransferase	D-Sorbitol	other
Burk376	H281DRAFT_03961	H281DRAFT_03961	xanthine dehydrogenase small subunit	2-Deoxyadenosine 5-monophosphate,2-Deoxyadenosine 5-monophosphate	enzyme	xanthine dehydrogenase, small subunit
psRCH2	GFF1051	Psest_1084	Acyl-CoA dehydrogenases	L-Leucine,L-Leucine,L-Valine,L-Valine	enzyme	Isovaleryl-CoA dehydrogenase (EC 1.3.8.4)
pseudo6_N2E2	Pf6N2E2_4437		Twin-arginine translocation protein TatB	D-Galactose,D-Alanine	other
pseudo3_N2E3	AO353_00055	AO353_00055	ion channel protein Tsx	Adenosine	nonspec
Pedo557	CA265_RS00130	CA265_RS00130	glycosyltransferase	casamino acids	other
WCS417	GFF532	PS417_02710	urease accessory protein UreE	Inosine,Urea	enzyme	Ni insertion into urease
Smeli	SMc04251	SMc04251	mannitol-binding periplasmic signal peptide protein	Sodium D,L-Lactate	transporter	dctP-like component of a pyruvate transporter, with SMc04248 and SMc04249
pseudo5_N2C3_1	AO356_22990	AO356_22990	2-oxoisovalerate dehydrogenase	L-Isoleucine,L-Leucine,L-Leucine	enzyme	branched-chain alpha-ketoacid dehydrogenase, E1 component alpha subunit (EC 1.2.4.4)
MR1	199602	SO0409	hypothetical protein (NCBI ptt file)	Sodium D,L-Lactate,Gly-Glu	other
WCS417	GFF2421	PS417_12345	cobalamin biosynthesis protein CobW	Glycine	other
BFirm	BPHYT_RS19330	BPHYT_RS19330	glycine dehydrogenase (decarboxylating)	Gly-Glu	enzyme	glycine cleavage system P protein (EC 1.4.4.2), important on glycine and related compounds
pseudo13_GW456_L13	PfGW456L13_2244		2-keto-3-deoxy-D-arabino-heptulosonate-7- phosphate synthase II (EC 2.5.1.54)	L-Phenylalanine,L-Phenylalanine	other	the other two isozymes for this biosynthetic step probably aren’t expressed in this condition
MR1	202865	SO3774	proline dehydrogenase/delta-1-pyrroline-5-carboxylate dehydrogenase, putative (NCBI ptt file)	Gelatin,Gelatin	enzyme	proline dehydrogenase/delta-1-pyrroline-5-carboxylate dehydrogenase (gelatin contains a lot of proline)
BFirm	BPHYT_RS03870	BPHYT_RS03870	aldehyde oxidase	Deoxyribonucleic acid from herring sperm,Deoxyribonucleic acid from herring sperm	enzyme	xanthine dehydrogenase, molybdopterin binding subunit
Pedo557	CA265_RS20230	CA265_RS20230	hypothetical protein	D-Galacturonic Acid monohydrate,D-Galacturonic Acid monohydrate	other	very clear phenotype, but no PaperBLAST or InterPro hits, and foldseek didn’t help
pseudo13_GW456_L13	PfGW456L13_5118		Predicted D-lactate dehydrogenase, Fe-S protein, FAD/FMN-containing	Sodium D-Lactate,Glycerol,Sodium D-Lactate,Glycerol	enzyme	D-lactate dehydrogenase, FeS subunit; phenotype on glycerol is not explained but maybe there is a side alcohol/aldehyde dehydrogenase pathway?
WCS417	GFF1318	PS417_06700	3-oxoadipate:succinyl-CoA transferase	L-Tryptophan	enzyme	3-oxoadipate CoA-transferase (EC 2.8.3.6)
Korea	Ga0059261_2460	Ga0059261_2460	Uncharacterized protein conserved in bacteria	L-Glutamine,L-Proline	other
WCS417	GFF872	PS417_04425	histidinol-phosphate aminotransferase	L-Malic acid disodium salt monohydrate,L-Tryptophan	other
Phaeo	GFF1474	PGA1_c14930	putative MFS transporter	Adenosine,Adenosine	other	suspect efflux of adenosine or byproduct, not uptake
Koxy	BWI76_RS27185	BWI76_RS27185	L-lactate permease	Sodium D-Lactate,Sodium L-Lactate,Sodium D,L-Lactate,Sodium D-Lactate,Sodium L-Lactate,Sodium D,L-Lactate	transporter	L-lactate/D-lactate permease (some homologs also transport glycolate)
pseudo13_GW456_L13	PfGW456L13_3320		L-arabonate dehydratase (EC 4.2.1.25)	L-Arabinose,L-Arabinose	enzyme	L-arabonate dehydratase (EC 4.2.1.25)
pseudo13_GW456_L13	PfGW456L13_3038		Multiple polyol-specific dehydrogenase (EC 1.1.1.-)	D-Mannose,D-Mannose	enzyme	mannitol 2-dehydrogenase (mannose is apparently converted to fructose via mannitol); very simlar to O08355
pseudo5_N2C3_1	AO356_08365	AO356_08365	urease accessory protein UreD	Adenine hydrochloride hydrate	enzyme	helps incorporate Ni into urease; important for utilization of urease as N source
pseudo5_N2C3_1	AO356_14210	AO356_14210	pyrroloquinoline quinone biosynthesis protein PqqC	Ethanol	other
Cola	Echvi_2049	Echvi_2049	tRNA-guanine transglycosylase, queuosine-34-forming	L-Lysine	other
SB2B	6939162	Sama_3260	HlyD family secretion protein (RefSeq)	Sodium L-Lactate	other
Caulo	CCNA_02983	CCNA_02983	polyprenyl-phosphate beta-D-glucosyltransferase	Adenosine,Adenosine	other
Smeli	SMc03961	SMc03961	sulfolipid (UDP-sulfoquinovose) biosynthesis protein	L-Arginine	other
Putida	PP_2457	PP_2457	DNA-binding transcriptional repressor	4-Hydroxyvalerate	other
Phaeo	GFF2735	PGA1_c27770	putative ABC transporter inner membrane component	L-Proline,L-Threonine	other	probably tungstate uptake (cofit with formate dehydrogenase)
Keio	17589	b3528	C4-dicarboxylate transport protein (NCBI)	Sodium succinate dibasic hexahydrate,Sodium succinate dibasic hexahydrate,L-Malic acid disodium salt monohydrate,L-Malic acid disodium salt monohydrate,casamino acids,casamino acids	transporter	C4 dicarboxylate/orotate:H+ symporter
pseudo6_N2E2	Pf6N2E2_1101		Transporter, LysE family	L-Leucine,L-Leucine,L-Leucine,L-Leucine	other	detrimental leucine export?
WCS417	GFF4423	PS417_22645	C4-dicarboxylate ABC transporter	a-Ketoglutaric acid disodium salt hydrate,a-Ketoglutaric acid disodium salt hydrate	other
MR1	200631	SO1459	hypothetical protein (NCBI ptt file)	L-Glutamic acid monopotassium salt monohydrate,L-Threonine,L-Asparagine,L-Glutamine,L-Glutamic acid monopotassium salt monohydrate,L-Threonine,L-Asparagine,L-Glutamine	other
Cup4G11	RR42_RS01400	RR42_RS01400	5-formyltetrahydrofolate cyclo-ligase	4-Hydroxybenzoic Acid,4-Hydroxybenzoic Acid,L-Tryptophan	other	5,10-methenyltetrahydrofolate synthetase (also known as 5-formyltetrahydrofolate cycloligase)
acidovorax_3H11	Ac3H11_165		Aminomethyltransferase (glycine cleavage system T protein) (EC 2.1.2.10)	L-tyrosine disodium salt	other
pseudo13_GW456_L13	PfGW456L13_4045		Soluble lytic murein transglycosylase precursor (EC 3.2.1.-)	Sodium octanoate	other
Keio	15320	b1198	fused predicted dihydroxyacetone-specific PTS enzymes: HPr component/EI component (RefSeq)	Sodium succinate dibasic hexahydrate,Sodium succinate dibasic hexahydrate,L-Malic acid disodium salt monohydrate,L-Malic acid disodium salt monohydrate	other
HerbieS	HSERO_RS10515	HSERO_RS10515	membrane protein	Phenylacetic acid,Phenylacetic acid	other	probably phenylacetate efflux
pseudo6_N2E2	Pf6N2E2_5471		Transcriptional activator MetR	L-Glutamine	other
PV4	5208916	Shew_1417	undecaprenyl-phosphate alpha-N-acetylglucosaminyl 1-phosphatetransferase (RefSeq)	L-Glutamine	other
Dino	3609821	Dshi_3204	Chitin deacetylase (RefSeq)	Inosine,Adenine hydrochloride hydrate	enzyme	allantoinase (EC 3.5.2.5)
Smeli	SM_b21222	SM_b21222	transcriptional regulator	D-Glucosamine Hydrochloride	other
WCS417	GFF4103	PS417_21020	phosphoenolpyruvate synthase	L-Arabinose,Sodium L-Lactate,Sodium D,L-Lactate,L-Arabinose,Sodium L-Lactate,Sodium D,L-Lactate,N-Acetyl-D-Glucosamine,N-Acetyl-D-Glucosamine	nonspec
PV4	5208151	Shew_0663	oxidoreductase (RefSeq)	Sodium L-Lactate,Sodium D,L-Lactate,Sodium pyruvate	nonspec
PV4	5209912	Shew_2360	D-amino-acid dehydrogenase (RefSeq)	Gelatin,Gelatin	enzyme	D-hydroxyproline dehydrogenase (a major component of gelatin)
Marino	GFF879	HP15_858	aspartate aminotransferase	L-Phenylalanine,L-Phenylalanine	enzyme	phenylalanine aminotransferase (EC 2.6.1.57)
Koxy	BWI76_RS00670	BWI76_RS00670	rhamnulose-1-phosphate aldolase	L-Rhamnose monohydrate,L-Rhamnose monohydrate	enzyme	Rhamnulose-1-phosphate aldolase (EC 4.1.2.19)
MR1	202607	SO3506	SIS domain protein (NCBI ptt file)	N-Acetyl-D-Glucosamine,N-Acetyl-D-Glucosamine	enzyme	Glucosamine-6-phosphate deaminase [isomerizing], alternative (EC 3.5.99.6)
WCS417	GFF93	PS417_00470	glutamate:protein symporter	L-Glutamine	nonspec	detrimental on glutamine
Cup4G11	RR42_RS23735	RR42_RS23735	phenylacetic acid degradation protein	L-Leucine,Phenylacetic acid,Phenylacetic acid	enzyme	phenylacetyl-CoA 1,2-epoxidase, structural subunit
pseudo5_N2C3_1	AO356_13845	AO356_13845	3-hydroxybutyryl-CoA dehydrogenase	Carnitine Hydrochloride,Carnitine Hydrochloride	enzyme	Carnitine 3-dehydrogenase (EC 1.1.1.108)
pseudo1_N1B4	Pf1N1B4_2541		Spermidine Putrescine ABC transporter permease component potC (TC_3.A.1.11.1)	L-Arabinose,D-Galactose,L-Arabinose,D-Galactose	other	Pf1N1B4_409:Pf1N1B4_411 is the L-arabinose/D-galactose transporter so the role of this other transporter is mysterious
SB2B	6937065	Sama_1236	psp operon transcriptional activator (RefSeq)	Glycine	other
MR1	203190	SO4106	MSHA pilin protein MshB (NCBI ptt file)	L-Glutamine,Gelatin,L-Glutamine,Gelatin,L-Phenylalanine	other
Koxy	BWI76_RS04620	BWI76_RS04620	transcriptional regulator SgrR	L-Sorbose,L-Sorbose	other
pseudo13_GW456_L13	PfGW456L13_117		Oxidoreductase, short chain dehydrogenase/reductase family	D-Serine	other
Keio	14901	b0776	8-amino-7-oxononanoate synthase (NCBI)	Sodium succinate dibasic hexahydrate,Sodium succinate dibasic hexahydrate,Glycolic Acid,L-Malic acid disodium salt monohydrate,L-Malic acid disodium salt monohydrate,D-Galacturonic Acid monohydrate,D-Galacturonic Acid monohydrate,D-Glucose,D-Glucose	other
acidovorax_3H11	Ac3H11_3035		Fructose ABC transporter, substrate-binding component FrcB	D-Fructose,D-Fructose,D-Fructose,D-Sorbitol,D-Mannose	transporter	Fructose ABC transporter, substrate-binding component FrcB
Putida	PP_1015	PP_1015	mannose/glucose ABC transporter, glucose-binding periplasmic protein	Propandiamine,Propandiamine	nonspec	glucose is the C source for these N source experiments
Putida	PP_2791	PP_2791	Aminoglycoside phosphotransferase	4-Hydroxyvalerate,4-Hydroxyvalerate,Levulinic Acid,Levulinic Acid,Levulinic Acid,Levulinic Acid	enzyme	4-hydroxypentanoyl-CoA kinase, subunit LvaA
acidovorax_3H11	Ac3H11_2956		Dihydropyrimidinase (EC 3.5.2.2)	Uridine	enzyme	Dihydropyrimidinase (EC 3.5.2.2)
azobra	AZOBR_RS15920	AZOBR_RS15920	dehydroascorbate transporter	D-Gluconic Acid sodium salt,D-Gluconic Acid sodium salt	transporter	Large component of TRAP-type D-gluconate transporter
MR1	199503	SO0308	conserved hypothetical protein (NCBI ptt file)	L-Methionine,L-Methionine	other	threonine export?
pseudo3_N2E3	AO353_07660	AO353_07660	sarcosine oxidase subunit beta	Carnitine Hydrochloride,Carnitine Hydrochloride	enzyme	sarcosine oxidase (5,10-methylenetetrahydrofolate-forming), beta subunit, EC 1.5.3.24
pseudo5_N2C3_1	AO356_28535	AO356_28535	mannitol dehydrogenase	D-Mannose	other	D-mannonate oxidoreductase? May be part of a side pathway (the main path is probably mannose isomerase AO356_05200)
SB2B	6939291	Sama_3384	glycosyl transferase, group 2 family protein (RefSeq)	Tween 20	other
BFirm	BPHYT_RS22235	BPHYT_RS22235	sensor histidine kinase	Sodium pyruvate,2-Deoxyadenosine 5-monophosphate	other
HerbieS	HSERO_RS10840	HSERO_RS10840	cyanophycin synthetase	L-Fucose,L-Fucose	other
PV4	5209875	Shew_2328	signal transduction histidine kinase, LytS (RefSeq)	Sodium pyruvate,Sodium pyruvate	other
DvH	206152	DVU0726	queuine tRNA-ribosyltransferase (TIGR)	L-Threonine,L-Leucine,L-Leucine,L-Leucine	other
Keio	15323	b1201	putative sensor-type regulator (VIMSS)	Sodium succinate dibasic hexahydrate,Sodium succinate dibasic hexahydrate,L-Malic acid disodium salt monohydrate,L-Malic acid disodium salt monohydrate	other
Smeli	SM_b20894	SM_b20894	sugar uptake ABC transporter ATP-binding protein	L-Arabinose	transporter	L-arabinose ABC transporter, ATPase component; by similarity to Agrobacterium, also probably transporters xylose, galactose, glucose, fucose
Caulo	CCNA_03160	CCNA_03160	molybdopterin-guanine dinucleotide biosynthesis protein A	Sodium nitrate,Sodium nitrate	other	likely molybdenum cofactor guanylyltransferase, for the dinucleotide Mo cofactor of nitrate reductase; but not certain
Btheta	349781	BT0253	hypothetical protein (NCBI ptt file)	Hyaluronic acid sodium salt from Streptococcus equi	other
Cola	Echvi_2793	Echvi_2793	hypothetical protein	L-Serine,L-Serine	other
pseudo3_N2E3	AO353_18575	AO353_18575	aromatic amino acid aminotransferase	L-Phenylalanine,L-tyrosine disodium salt	enzyme	tyrosine aminotransferase (EC 2.6.1.57)
Koxy	BWI76_RS12395	BWI76_RS12395	zinc-binding alcohol dehydrogenase	a-Cyclodextrin	other
pseudo6_N2E2	Pf6N2E2_3577		Branched-chain amino acid transport ATP-binding protein LivG (TC 3.A.1.4.1)	D-Alanine,L-Leucine,L-Leucine	transporter	ABC transporter for L-leucine/L-isoleucine/L-phenylalanine/D-alanine, ATPase component 1 LivG
Koxy	BWI76_RS22785	BWI76_RS22785	NAD(P)H-binding protein	D,L-Malic Acid,D,L-Malic Acid	other
pseudo13_GW456_L13	PfGW456L13_5054		Dipeptide-binding ABC transporter, periplasmic substrate-binding component (TC 3.A.1.5.2)	Gly-DL-Asp,Gly-Glu	other	likely a dipeptide transporter, but it is detrimental (too much uptake?)
pseudo1_N1B4	Pf1N1B4_2617		Membrane protein with DUF350 domain	Sodium octanoate	other
Putida	PP_2645	PP_2645	magnesium transporter, ATP-dependent	Propandiamine,Propandiamine	other
pseudo5_N2C3_1	AO356_14110	AO356_14110	chloramphenical resistance permease RarD	D-Serine	transporter	D-serine transporter (conserved phenotype)
pseudo13_GW456_L13	PfGW456L13_740		L-asparaginase (EC 3.5.1.1)	L-Asparagine,L-Tryptophan,L-Asparagine,L-Asparagine	enzyme	L-asparaginase (EC 3.5.1.1)
Pedo557	CA265_RS19430	CA265_RS19430	excinuclease ABC subunit B	L-Histidine	other
Keio	15638	b1517	hypothetical protein (NCBI)	D-Ribose,a-Ketoglutaric acid disodium salt hydrate,Potassium acetate,Sodium D-Lactate,Sodium D-Lactate	other
Cola	Echvi_1069	Echvi_1069	3-hydroxyacyl-CoA dehydrogenase	D-Glucosamine Hydrochloride,D-Glucosamine Hydrochloride,D-Glucosamine Hydrochloride	other
pseudo6_N2E2	Pf6N2E2_2862		Uncharacterized PLP-dependent aminotransferase YfdZ	L-Serine	other
azobra	AZOBR_RS29710	AZOBR_RS29710	amidase	Cytosine	other
psRCH2	GFF760	Psest_0774	Purine-cytosine permease and related proteins	Cytosine,Cytosine,Cytosine	transporter	cytosine permease
pseudo13_GW456_L13	PfGW456L13_4527		Tricarboxylate transport protein TctB	Trisodium citrate dihydrate	transporter	tricarboxylate transporter component TctB
Dino	3608299	Dshi_1702	ABC transporter related (RefSeq)	Sodium L-Lactate,Sodium L-Lactate	other
pseudo3_N2E3	AO353_20545	AO353_20545	excinuclease ABC subunit B	L-Phenylalanine	other
pseudo1_N1B4	Pf1N1B4_2521		FIG004684: SpoVR-like protein	Sucrose,Sucrose,Sucrose,Sucrose	other
Koxy	BWI76_RS01295	BWI76_RS01295	uridine phosphorylase	Cytidine,Cytidine,Uridine,Uridine	enzyme	Uridine phosphorylase (EC 2.4.2.3)
pseudo1_N1B4	Pf1N1B4_3766		Uricase (urate oxidase) (EC 1.7.3.3)	Glycerol	other	this is allantoinase, but the phenotype on glycerol is unexplained
Btheta	350647	BT1119	putative outer membrane protein, probably involved in nutrient binding (NCBI ptt file)	D-Galacturonic Acid monohydrate,D-Galacturonic Acid monohydrate	transporter	TonB-dependent receptor for D-galacturonate and 1,4-beta-D-galactobiose (SusC-like)
pseudo5_N2C3_1	AO356_13590	AO356_13590	DEAD/DEAH box helicase	L-Histidine,L-Histidine	other
pseudo13_GW456_L13	PfGW456L13_805		Aldehyde dehydrogenase (EC 1.2.1.3)	Putrescine Dihydrochloride,Putrescine Dihydrochloride	enzyme	gamma-glutamyl-gamma-aminobutyraldehyde dehydrogenase (EC 1.2.1.99); 4-guanidinobutyraldehyde dehydrogenase (EC 1.2.1.54)
Putida	PP_1430	PP_1430	putative periplasmic serine endoprotease DegP-like	Tween 20	other
pseudo6_N2E2	Pf6N2E2_3268		Ribosome hibernation protein YhbH	Sodium propionate	other
pseudo3_N2E3	AO353_26885	AO353_26885	bifunctional glyoxylate/hydroxypyruvate reductase B	D-Gluconic Acid sodium salt,D-Gluconic Acid sodium salt,Gly-Glu,L-Lysine,L-Threonine,L-Lysine,L-Threonine	enzyme	2-dehydro-6-phosphogluconate reductase, involved in utilization of gluconate and glucose (with alternate N sources), see PMC1951859
Phaeo	GFF2754	PGA1_c27970	ATP-binding transport protein SmoK	N-Acetyl-D-Glucosamine,N-Acetyl-D-Glucosamine,N-Acetyl-D-Glucosamine	transporter	N-Acetyl-D-glucosamine ABC transport system, ATPase component
Phaeo	GFF2910	PGA1_c29570	ATPase-like protein	Trisodium citrate dihydrate,Trisodium citrate dihydrate,Cytidine	other
pseudo5_N2C3_1	AO356_12995	AO356_12995	cell division protein ZapA	D-Serine	other
DvH	209196	DVU0262	hypothetical protein (TIGR)	Thymine	other
pseudo13_GW456_L13	PfGW456L13_3505		Possible pyrimidine permease in reductive pathway	Uridine,Cytosine	transporter	uridine/cytosine permease
Burk376	H281DRAFT_03616	H281DRAFT_03616	4-hydroxy-3-methylbut-2-enyl diphosphate reductase	Deoxyribonucleic acid from herring sperm,Deoxyribonucleic acid from herring sperm	other
MR1	201012	SO1850	DnaJ domain protein (NCBI ptt file)	L-Methionine,L-Methionine	other
psRCH2	GFF2227	Psest_2272	coenzyme PQQ biosynthesis protein C	Ethanol,Ethanol	other	(probably making the cofactor for Psest_2060, the major ethanol dehydrogenase)
SB2B	6938906	Sama_3009	succinylglutamic semialdehyde dehydrogenase (RefSeq)	L-Arginine,L-Arginine	enzyme	Succinylglutamic semialdehyde dehydrogenase (EC 1.2.1.71)
Koxy	BWI76_RS00675	BWI76_RS00675	L-rhamnose isomerase	L-Rhamnose monohydrate,L-Rhamnose monohydrate	enzyme	L-rhamnose isomerase (EC 5.3.1.14)
pseudo6_N2E2	Pf6N2E2_5486		Dicarboxylate MFS transporter	a-Ketoglutaric acid disodium salt hydrate,a-Ketoglutaric acid disodium salt hydrate	transporter	Alpha-ketoglutarate permease
BFirm	BPHYT_RS15805	BPHYT_RS15805	carnitine dehydratase	D-Glucosamine Hydrochloride	nonspec
Korea	Ga0059261_1776	Ga0059261_1776	Transcriptional regulator/sugar kinase	D-Raffinose pentahydrate,D-Fructose,D-Raffinose pentahydrate	enzyme	Fructokinase (EC 2.7.1.4)
psRCH2	GFF3906	Psest_3976	PAS domain S-box	Sodium butyrate,Sodium nitrite	other
Dino	3609574	Dshi_2958	Xanthine dehydrogenase small subunit (RefSeq)	Adenine hydrochloride hydrate	enzyme	Xanthine dehydrogenase (EC 1.17.1.4)
acidovorax_3H11	Ac3H11_2304		Polyhydroxyalkanoic acid synthase	L-Threonine,L-Proline	nonspec
Pedo557	CA265_RS07845	CA265_RS07845	signal transduction protein	D-Galactose,D-Galactose	other
psRCH2	GFF2441	Psest_2489	branched-chain amino acid uptake carrier	L-Valine,L-Valine	nonspec
Putida	PP_0302	PP_0302	L-carnitine dehydrogenase	Carnitine Hydrochloride,Carnitine Hydrochloride	enzyme	L-carnitine dehydrogenase [EC: 1.1.1.108]
Smeli	SM_b21648	SM_b21648	alpha-galactosidase (melibiase) protein	D-Raffinose pentahydrate	enzyme	Alpha-galactosidase (EC: 3.2.1.22)
pseudo3_N2E3	AO353_11755	AO353_11755	ribosomal protein S6 modification protein	Gly-Glu	other
Putida	PP_0282	PP_0282	L-arginine ABC transporter - periplasmic binding subunit	Propandiamine	nonspec
pseudo3_N2E3	AO353_25960	AO353_25960	threonine dehydratase	Sodium propionate,Sodium propionate,L-Valine	nonspec
acidovorax_3H11	Ac3H11_3545		Glyoxalase family protein	L-Phenylalanine,L-tyrosine disodium salt	other
psRCH2	GFF2012	Psest_2055	Cytochrome c, mono- and diheme variants	Ethanol,Ethanol	enzyme	cytochrome c550 (electron acceptor for quinoprotein ethanol dehydrogenase)
Caulo	CCNA_03241	CCNA_03241	glutamate-1-semialdehyde 2,1-aminomutase	Putrescine Dihydrochloride,Putrescine Dihydrochloride	other	glutamate-1-semialdehyde-aminomutase for heme synthesis is unlikely, see PMC6154995. Really is part of putrescine degradation I think, but not sure for what; GapMind finds a complete path and one of the best candidates for each step is important for fitness on N putrescine
pseudo5_N2C3_1	AO356_13815	AO356_13815	glycine/betaine ABC transporter substrate-binding protein	Carnitine Hydrochloride,Carnitine Hydrochloride	transporter	ABC transporter for Carnitine, periplasmic substrate-binding component 1
pseudo6_N2E2	Pf6N2E2_2167		hypothetical protein	D-Galactose,D-Galactose	other
pseudo5_N2C3_1	AO356_22995	AO356_22995	ArsR family transcriptional regulator	L-Isoleucine,L-Leucine,D-Alanine	other
pseudo5_N2C3_1	AO356_19395	AO356_19395	aminopeptidase	N-Acetyl-D-Glucosamine	other
acidovorax_3H11	Ac3H11_1213		Cobalt-zinc-cadmium resistance protein CzcA; Cation efflux system protein CusA	Tween 20	other	suspect efflux of fatty acids
Phaeo	GFF3535	PGA1_c35880	FlgN-like protein	L-Glutamine	other
BFirm	BPHYT_RS16725	BPHYT_RS16725	permease	D-Gluconic Acid sodium salt	transporter	gluconate:H+ symporter (gntT)
acidovorax_3H11	Ac3H11_3672		Radical SAM family enzyme, similar to coproporphyrinogen III oxidase, oxygen-independent, clustered with nucleoside-triphosphatase RdgB	Tween 20	other
HerbieS	HSERO_RS17015	HSERO_RS17015	sulfurtransferase	D-Sorbitol,Xylitol	enzyme	sorbitol dehydrogenase (EC 1.1.1.14); xylitol dehydrogenase (EC 1.1.1.9)
Btheta	353014	BT3487	arylsulfatase (aryl-sulfate sulphohydrolase) (NCBI ptt file)	Hyaluronic acid sodium salt from Streptococcus equi	nonspec
ANA3	7024897	Shewana3_2071	short-chain dehydrogenase/reductase SDR (RefSeq)	L-Arabinose	enzyme	L-arabinose 1-dehydrogenase (EC 1.1.1.46)
acidovorax_3H11	Ac3H11_4262		Protein YidD	L-tyrosine disodium salt	other
pseudo1_N1B4	Pf1N1B4_1313		tRNA dihydrouridine synthase B (EC 1.-.-.-)	D-Glucosamine Hydrochloride	other
DvH	207696	DVU2212	conserved hypothetical protein (TIGR)	L-Threonine,Glycine,Glycine,Glycine,L-Alanine,L-Alanine,L-Alanine	other
pseudo13_GW456_L13	PfGW456L13_1868		Glycine dehydrogenase [decarboxylating] (glycine cleavage system P protein) (EC 1.4.4.2)	L-Threonine,Glycine,Gly-DL-Asp	enzyme	Glycine dehydrogenase (aminomethyl-transferring) (EC 1.4.4.2)
pseudo13_GW456_L13	PfGW456L13_4770		Glutamate Aspartate periplasmic binding protein precursor GltI (TC 3.A.1.3.4)	L-Asparagine,L-Glutamine,L-Asparagine,L-Glutamine,Sodium octanoate	transporter	ABC transporter for L-Asparagine and possibly other L-amino acids, periplasmic substrate-binding component
Cola	Echvi_1727	Echvi_1727	ABC-type multidrug transport system, ATPase and permease components	L-Serine	other
pseudo6_N2E2	Pf6N2E2_3799		Histidine ammonia-lyase (EC 4.3.1.3)	L-Histidine,L-Histidine,L-Histidine,L-Histidine	enzyme	Histidine ammonia-lyase (EC 4.3.1.3)
pseudo6_N2E2	Pf6N2E2_5305		Iron(III) dicitrate transport protein FecA @ Iron siderophore receptor protein	Trisodium citrate dihydrate,Trisodium citrate dihydrate	transporter	Fe(3+) dicitrate transport protein FecA
MR1	199837	SO0649	hypothetical protein (NCBI ptt file)	L-Methionine,L-Methionine	other
azobra	AZOBR_RS32335	AZOBR_RS32335	PTS fructose transporter subunit IIBC	D-Fructose,D-Fructose	transporter	fructose-specific PTS system (fructose 1-phosphate forming), EII-B'BC components (FruA)
pseudo1_N1B4	Pf1N1B4_3314		Tricarboxylate porin OpdH	D-Ribose,Sodium Fumarate dibasic,Sodium D-Lactate	nonspec
pseudo13_GW456_L13	PfGW456L13_2172		S-adenosylhomocysteine deaminase (EC 3.5.4.28); Methylthioadenosine deaminase	Sodium D-Lactate,Sodium D-Lactate,L-Proline	other
pseudo1_N1B4	Pf1N1B4_2262		Putrescine transport system permease protein PotH (TC 3.A.1.11.2)	Cytidine,L-Lysine	transporter	Putrescine/lysine transporter component (conserved phenotype on lysine; close homologs are very important for putrescine utilization)
acidovorax_3H11	Ac3H11_2379		exported protein	L-tyrosine disodium salt	other
Dino	3607443	Dshi_0856	protein of unknown function DUF404 (RefSeq)	Glycerol,L-Glutamine	other
pseudo13_GW456_L13	PfGW456L13_3524		FIG00443700: hypothetical protein	L-Arabinose,L-Arabinose,L-Malic acid disodium salt monohydrate	other
pseudo13_GW456_L13	PfGW456L13_2985		Butyryl-CoA dehydrogenase (EC 1.3.99.2)	L-Valine,L-Valine,L-Valine	transporter	isobutyryl-CoA dehydrogenase (EC 1.3.8.5) (modest phenotype, but conserved, and some homologs have a much stronger phenotype)
Smeli	SM_b20197	SM_b20197	ribulose-1,5-bisphosphate carboxylase small subunit protein	L-Proline	enzyme	ribulose-1,5-bisphosphate carboxylase small subunit (proline is oxidized to release CO2 and the CO2 is fixed)
pseudo3_N2E3	AO353_07190	AO353_07190	S-adenosylmethionine decarboxylase proenzyme	L-Ornithine	other
Btheta	352336	BT2809	putative integral membrane protein (NCBI ptt file)	D-Ribose	transporter	D-ribose transporter
acidovorax_3H11	Ac3H11_1383		Flagellar biosynthesis protein FlhF	Uridine	other
Dino	3608607	Dshi_2000	D-xylose ABC transporter, periplasmic substrate-binding protein (RefSeq)	Xylitol,Xylitol	transporter	xylitol transporter; may also be a glucose transporter (weak phenotypes in Dino, and a close homolog is a glucose transporter) and a xylose transporter (Dino grows poorly on xylose, and no fitness data, but 66% id. to a glucose/xylose transporter from Agrobacterium)
Korea	Ga0059261_3265	Ga0059261_3265	Glycerol-3-phosphate dehydrogenase	N-Acetyl-D-Glucosamine,N-Acetyl-D-Glucosamine	nonspec	probably D-erythritol 1-phosphate dehydrogenase, but NAG is converted to fructose, so the link is not clear
HerbieS	HSERO_RS05250	HSERO_RS05250	D-ribose transporter ATP binding protein	L-Fucose,L-Fucose	transporter	ABC transporter for L-fucose, ATPase component
pseudo13_GW456_L13	PfGW456L13_1864		FIG023103: Predicted transmembrane protein	Putrescine Dihydrochloride	other
Smeli	SM_b21125	SM_b21125	hydroxymethylglutaryl-CoA lyase	L-Leucine	enzyme	Hydroxymethylglutaryl-CoA lyase (EC 4.1.3.4)
Putida	PP_3948	PP_3948	nicotinate dehydrogenase subunit B	Nicotinic Acid,Nicotinic Acid	enzyme	nicotinate dehydrogenase subunit B (also known as nicotinate hydroxylase)
ANA3	7026499	Shewana3_3642	Nitrilase/cyanide hydratase and apolipoprotein N-acyltransferase (RefSeq)	L-Leucine,L-Leucine	other	probably deaminated glutathione amidase
pseudo5_N2C3_1	AO356_12785	AO356_12785	chemotaxis protein CheY	Sodium D-Lactate,Ethanol,N-Acetyl-D-Glucosamine	other
Koxy	BWI76_RS26760	BWI76_RS26760	C4-dicarboxylate transporter DctA	Sodium succinate dibasic hexahydrate	transporter	C4-dicarboxylate transport protein (dctA)
pseudo1_N1B4	Pf1N1B4_2454		Serine hydroxymethyltransferase (EC 2.1.2.1)	Carnitine Hydrochloride,Carnitine Hydrochloride	enzyme	Serine hydroxymethyltransferase (EC 2.1.2.1)
Korea	Ga0059261_2662	Ga0059261_2662	Transcriptional regulators	D-Xylose	other
Caulo	CCNA_01015	CCNA_01015	multicopper oxidase PcoA	L-Arginine,L-Arginine	other
acidovorax_3H11	Ac3H11_61		Tricarboxylate transport membrane protein TctA	a-Ketoglutaric acid disodium salt hydrate,D-Gluconic Acid sodium salt,Sodium pyruvate,a-Ketoglutaric acid disodium salt hydrate,D-Gluconic Acid sodium salt,Sodium pyruvate	nonspec
MR1	203731	SO4662	lemA protein (NCBI ptt file)	L-Isoleucine,L-Serine	other
Koxy	BWI76_RS27785	BWI76_RS27785	hexose phosphate transporter	2-Deoxyadenosine 5-monophosphate	transporter	hexose-6-phosphate transporter (important on glucose-6-phosphate); the phenotype on dAMP implies transport of dAMP or deoxyribose-5-phosphate as well
pseudo13_GW456_L13	PfGW456L13_1430		tRNA (Uracil54-C5-)-methyltransferase (EC 2.1.1.35)	Sodium octanoate	other
Dyella79	N515DRAFT_2015	N515DRAFT_2015	branched-chain amino acid aminotransferase	L-Isoleucine,L-Leucine	enzyme	Branched-chain amino acid aminotransferase (EC 2.6.1.42)
acidovorax_3H11	Ac3H11_2043		OsmC/Ohr family protein	L-tyrosine disodium salt	other
pseudo6_N2E2	Pf6N2E2_5491		FOG: GGDEF domain	L-Serine,Cytidine,L-Serine	other
Btheta	351270	BT1742	carbon starvation protein A (NCBI ptt file)	L-Valine,L-Leucine	other
Koxy	BWI76_RS02085	BWI76_RS02085	cation acetate symporter	Sodium D-Lactate	nonspec
PV4	5207520	Shew_0054	hypothetical protein (RefSeq)	L-Malic acid disodium salt monohydrate	other
pseudo6_N2E2	Pf6N2E2_1965		Fructokinase (EC 2.7.1.4)	D-Sorbitol,D-Sorbitol	enzyme	Fructokinase (EC 2.7.1.4)
Phaeo	GFF439	PGA1_c04500	transcriptional regulator, AsnC family	Sodium pyruvate,Sodium pyruvate,L-Phenylalanine,L-Phenylalanine	other
WCS417	GFF1742	PS417_08860	membrane protein	Sodium pyruvate,Sodium pyruvate	transporter	small component of pyruvate transporter (yjcH-like)
Cola	Echvi_2921	Echvi_2921	Domain of Unknown Function (DUF1080).	D-Trehalose dihydrate	enzyme	predicted 3-ketoglycoside hydrolase (DUF1080)
MR1	202698	SO3601	sulfate ABC transporter, permease protein (NCBI ptt file)	Gly-Glu,Sodium D,L-Lactate,Gly-Glu,L-Alanine,L-Alanine,N-Acetyl-D-Glucosamine	nonspec
DvH	207314	DVU1848	conserved hypothetical protein (TIGR)	Glycine	other
Putida	PP_1349	PP_1349	ATP:cob(I)alamin adenosyltransferase	Ethanolamine,Ethanolamine	other
DvH	207726	DVU2242	asparaginase family protein (TIGR)	L-Asparagine,L-Asparagine,L-Asparagine	enzyme	asparaginase
WCS417	GFF1732	PS417_08810	glyoxylate carboligase	Inosine,Inosine,2'-Deoxyinosine,Deoxyribonucleic acid from herring sperm,Deoxyribonucleic acid from herring sperm,2'-Deoxyinosine,Deoxyribonucleic acid from herring sperm,Deoxyribonucleic acid from herring sperm	enzyme	glyoxylate carboligase (purines are catabolized via urate, allantoin, glyoxylate)
pseudo5_N2C3_1	AO356_12045	AO356_12045	homocysteine methyltransferase	L-Lysine,L-Lysine	other
Koxy	BWI76_RS26180	BWI76_RS26180	rhomboid family intramembrane serine protease GlpG	D,L-Malic Acid	other
pseudo13_GW456_L13	PfGW456L13_1900		Phosphogluconate repressor HexR, RpiR family	Sodium succinate dibasic hexahydrate,Glycerol,D-Fructose	other
Phaeo	GFF2738	PGA1_c27810	nicotinate-nucleotide pyrophosphorylase	casamino acids,Adenosine,Adenosine	other
pseudo5_N2C3_1	AO356_28105	AO356_28105	LuxR family transcriptional regulator	D-Alanine,Putrescine Dihydrochloride	other
pseudo6_N2E2	Pf6N2E2_804		Fructokinase (EC 2.7.1.4)	D-Fructose	nonspec
Btheta	353821	BT4295	putative chitobiase (NCBI ptt file)	(+)-Arabinogalactan	other
Btheta	352867	BT3340	beta-galactosidase (NCBI ptt file)	Beta-Lactose,Lactulose,Lactulose	enzyme	Beta-galactosidase
pseudo5_N2C3_1	AO356_16835	AO356_16835	maleylacetoacetate isomerase	L-Phenylalanine	enzyme	Maleylacetoacetate isomerase (EC 5.2.1.2)
MR1	199483	SO0288	damX domain protein (NCBI ptt file)	L-Methionine,L-Phenylalanine,L-Methionine,L-Phenylalanine	other
DvH	206334	DVU0906	lipoate-protein ligase B (TIGR)	Glycine,Glycine,Glycine,Putrescine Dihydrochloride	other
WCS417	GFF2157	PS417_11005	MFS transporter	L-Arabinose,L-Arabinose	transporter	arabinose transporter (strong conserved specific phenotype)
HerbieS	HSERO_RS11490	HSERO_RS11490	ABC transporter permease	D-Ribose,D-Ribose	transporter	D-ribose ABC transporter, permease component RbsC
Keio	14882	b0757	galactokinase (NCBI)	D-Galactose,D-Galactose,D-Galacturonic Acid monohydrate	enzyme	galactokinase
acidovorax_3H11	Ac3H11_1623		L-lactate dehydrogenase (EC 1.1.2.3)	Sodium L-Lactate,Sodium D,L-Lactate,Sodium L-Lactate,Sodium D,L-Lactate,Sodium L-Lactate,Sodium D,L-Lactate	enzyme	L-lactate dehydrogenase (cytochrome) (EC 1.1.2.3)
pseudo3_N2E3	AO353_22390	AO353_22390	aldehyde dehydrogenase	L-Citrulline	nonspec	complex phenotypes and possibly a wide range of substrates
Putida	PP_1378	PP_1378	alpha-ketoglutarate permease	benzoic acid	other	Reported to be the beta-ketoadipate transporter (“PcaT”, Liangyong Jiang, 2004 PhD thesis); phenotypes may be due to polar effects on PP_1379 (pcaB)
psRCH2	GFF2886	Psest_2942	Surface lipoprotein	Ethanol	other
WCS417	GFF1302	PS417_06615	leucine ABC transporter substrate-binding protein	L-Valine	transporter	Transporter for branched-chain amino acids (and probably others, given phenotypes of close homologs)
Koxy	BWI76_RS26615	BWI76_RS26615	idonate transporter	D-Gluconic Acid sodium salt,D-Gluconic Acid sodium salt	transporter	gluconate:H+ symporter
PV4	5210676	Shew_3104	TetR family transcriptional regulator (RefSeq)	L-Glutamine	other
Cup4G11	RR42_RS15395	RR42_RS15395	IclR family transcriptional regulator	a-Ketoglutaric acid disodium salt hydrate,a-Ketoglutaric acid disodium salt hydrate	other
psRCH2	GFF1786	Psest_1825	Predicted nucleoside-diphosphate sugar epimerases	Sodium butyrate,L-tyrosine disodium salt	other
pseudo6_N2E2	Pf6N2E2_4341		IcmF-related protein	L-Serine	other
Keio	15537	b1415	aldehyde dehydrogenase A, NAD-linked (NCBI)	L-Fucose	enzyme	Lactaldehyde dehydrogenase
WCS417	GFF573	PS417_02915	precorrin-3B C17-methyltransferase	Glycine,Adenosine	other
Smeli	SM_b21216	SM_b21216	sugar ABC transporter ATP-binding protein	D-Glucosamine Hydrochloride	transporter	ABC transporter for D-Glucosamine, ATPase component
MR1	202024	SO2898	SMC family protein (NCBI ptt file)	L-Isoleucine	other
acidovorax_3H11	Ac3H11_792		Glycerol-3-phosphate ABC transporter, ATP-binding protein UgpC (TC 3.A.1.1.3)	Glycerol	transporter	ABC transporter for Glycerol, ATPase component 2
Putida	PP_2251	PP_2251	conserved membrane protein of unknown function	Adenine hydrochloride hydrate,Adenine hydrochloride hydrate	other	possibly adenine efflux
acidovorax_3H11	Ac3H11_715		Transcriptional regulator, LysR family, in glycolate utilization operon	Tween 20,L-Leucine	other
Phaeo	GFF3155	PGA1_c32060	glutathione-binding protein GsiB	L-Histidine,L-Valine,L-Histidine	other	complex phenotypes
WCS417	GFF2462	PS417_12555	bifunctional glyoxylate/hydroxypyruvate reductase B	D-Gluconic Acid sodium salt,D-Gluconic Acid sodium salt,Putrescine Dihydrochloride,Adenine hydrochloride hydrate,Inosine,Ammonium chloride,Sodium nitrate,Urea	enzyme	2-dehydro-6-phosphogluconate reductase (variably important for glucose utilization, with a variety of N sources)
pseudo13_GW456_L13	PfGW456L13_4791		Transposase and inactivated derivatives	D-Alanine,D-Alanine,Glycine	other
pseudo3_N2E3	AO353_16285	AO353_16285	amino acid ABC transporter permease	L-Aspartic Acid,L-Glutamic acid monopotassium salt monohydrate,L-Asparagine,L-Glutamine,L-Aspartic Acid,L-Glutamic acid monopotassium salt monohydrate,L-Asparagine	transporter	ABC transporter for L-aspartate, L-asparagine, L-glutamate, and L-glutamine, permease component 2
Korea	Ga0059261_1504	Ga0059261_1504	Uncharacterized protein conserved in bacteria	L-Glutamine,L-Glutamine	other
Smeli	SM_b21105	SM_b21105	sugar ABC transporter permease	L-Fucose	transporter	ABC transporter for L-Fucose, permease component 2
pseudo6_N2E2	Pf6N2E2_1191		Thiaminase II (EC 3.5.99.2)	L-Serine,Glycine,L-Proline,L-Phenylalanine,Uridine,Cytidine,Cytosine,Glycine,L-Proline,L-Phenylalanine,Cytidine,Cytosine,Urea	other
pseudo13_GW456_L13	PfGW456L13_2982		3-ketoacyl-CoA thiolase (EC 2.3.1.16)	L-Isoleucine	enzyme	3-ketoacyl-CoA thiolase (EC 2.3.1.16)
Keio	18095	b4067	acetate permease (NCBI)	Glycolic Acid	nonspec
pseudo3_N2E3	AO353_29320	AO353_29320	spermidine/putrescine ABC transporter permease	Putrescine Dihydrochloride	transporter	putrescine transporter
pseudo13_GW456_L13	PfGW456L13_2549		Murein-DD-endopeptidase (EC 3.4.99.-)	Sodium octanoate	other
Smeli	SM_b20986	SM_b20986	nitrate reductase, large subunit protein	Sodium nitrate	enzyme	Nitrate reductase (EC 1.7.99.4)
psRCH2	GFF3942	Psest_4012	TRAP-type mannitol/chloroaromatic compound transport system, small permease component	L-Isoleucine,L-Isoleucine	other	weak phenotype, and not so cofit with the other component, so not sure if this the other isoleucine transporter or not. (The ABC transporter Psest_1308:Psest_1312 is only important when Ile is the N source, not the C source)
Putida	PP_3443	PP_3443	putative glyceraldehyde-3-phosphate dehydrogenase	D-Glucose	nonspec
Putida	PP_1408	PP_1408	(R)-3-hydroxydecanoyl-ACP:CoA transacylase	Sodium nitrite	other
PV4	5208605	Shew_1116	ATPase, BadF/BadG/BcrA/BcrD type (RefSeq)	N-Acetyl-D-Glucosamine	enzyme	N-acetylglucosamine kinase (EC 2.7.1.59)
azobra	AZOBR_RS10570	AZOBR_RS10570	cytochrome B562	a-Ketoglutaric acid disodium salt hydrate	other
Pedo557	CA265_RS15435	CA265_RS15435	hypothetical protein	Glycine,Glycine	transporter	glycine transporter
DvH	208830	DVU3303	ATP-dependent protease La, truncation (TIGR)	L-Leucine,L-Leucine,L-Leucine	other
PV4	5208152	Shew_0664	NAD(P) transhydrogenase subunit alpha (RefSeq)	Sodium L-Lactate,Sodium D,L-Lactate,Sodium pyruvate,Sodium L-Lactate,Sodium D,L-Lactate,Sodium pyruvate	other
pseudo6_N2E2	Pf6N2E2_1295		Sensor histidine kinase	Sodium pyruvate,Sodium pyruvate	other
WCS417	GFF3223	PS417_16500	arginyl-tRNA-protein transferase	L-Valine	other
Dino	3607940	Dshi_1348	multiple antibiotic resistance (MarC)-related protein (RefSeq)	Adenosine	other
pseudo13_GW456_L13	PfGW456L13_4001		Polysaccharide export lipoprotein Wza	D-Fructose,D-Serine	other
DvH	208044	DVU2547	transcriptional regulator, putative (TIGR)	Sodium nitrite	other
Keio	15705	b1584	spermidine N1-acetyltransferase (NCBI)	a-Ketoglutaric acid disodium salt hydrate,a-Ketoglutaric acid disodium salt hydrate,Sodium succinate dibasic hexahydrate,L-Malic acid disodium salt monohydrate,L-Malic acid disodium salt monohydrate	other
pseudo13_GW456_L13	PfGW456L13_1977		Succinylglutamate desuccinylase (EC 3.5.1.96)	L-Arginine	enzyme	Succinylglutamate desuccinylase (EC 3.5.1.96)
SB2B	6937207	Sama_1377	butyryl-CoA dehydrogenase (RefSeq)	Putrescine Dihydrochloride	nonspec
Smeli	SMa0247	SMa0247	hypothetical protein	D-Arabinose	enzyme	2-dehydro-3-deoxy-D-arabinonate dehydratase, 2,4-dioxopentanoate forming
Btheta	351290	BT1762	putative outer membrane protein, probably involved in nutrient binding (NCBI ptt file)	Fructooligosaccharides (FOS),Fructooligosaccharides (FOS)	transporter	Fructo-oligosaccharide transporter (SusD component) [from biochemical evidence]
pseudo13_GW456_L13	PfGW456L13_4091		D-alanyl-D-alanine carboxypeptidase (EC 3.4.16.4)	Sodium octanoate	other
Cup4G11	RR42_RS03065	RR42_RS03065	membrane protein	Ethanol	other
Putida	PP_0263	PP_0263	C4-dicarboxylate transport transcriptional regulatory protein	Sodium succinate dibasic hexahydrate	other
Pedo557	CA265_RS04015	CA265_RS04015	ABC transporter ATP-binding protein	Lactulose,Lactulose	nonspec
pseudo6_N2E2	Pf6N2E2_1072		LmbE-like protein	Cytidine,Cytosine	other
Keio	16094	b1983	hypothetical protein (NCBI)	Putrescine Dihydrochloride	other
BFirm	BPHYT_RS15730	BPHYT_RS15730	isocitrate dehydrogenase	Xylitol	other
pseudo5_N2C3_1	AO356_22970	AO356_22970	branched-chain amino acid aminotransferase	Potassium acetate,L-Lysine,L-Lysine,L-Isoleucine,L-Leucine,L-Isoleucine,L-Leucine	enzyme	Branched-chain amino acid aminotransferase (EC 2.6.1.42)
Dyella79	N515DRAFT_1084	N515DRAFT_1084	D-methionine transport system permease protein	L-Alanine,L-Alanine	nonspec	weak non-conserved phenotype, not clear if this is transporters L-alanine or not
DvH	206685	DVU1246	membrane protein, putative (TIGR)	L-Arginine	other
Smeli	SM_b21646	SM_b21646	ABC transporter permease	D-Raffinose pentahydrate	transporter	ABC transporter for D-Raffinose, permease component 2
pseudo13_GW456_L13	PfGW456L13_4468		Isocitrate dehydrogenase phosphatase (EC 2.7.11.5)/kinase (EC 3.1.3.-)	Tween 20	other
Marino	GFF3085	HP15_3028	TRAP dicarboxylate family transporter, DctP subunit	Sodium D-Lactate	transporter	L-lactate uptake protein (The mutant is possibly polar on D-lactate oxidase HP15_3024, but role is confirmed by similarity to Q5SK82)
MR1	199646	SO0454	conserved hypothetical protein (NCBI ptt file)	Sodium pyruvate,Sodium pyruvate	other
MR1	200162	SO0978	FAD-dependent glycerol-3-phosphate dehydrogenase, family protein (NCBI ptt file)	L-Isoleucine,L-Isoleucine	nonspec
DvH	206316	DVU0888	response regulator (TIGR)	L-Threonine	other
Keio	16894	b2810	cysteine sulfinate desulfinase (NCBI)	Sodium succinate dibasic hexahydrate,L-Malic acid disodium salt monohydrate,L-Malic acid disodium salt monohydrate	other
HerbieS	HSERO_RS19330	HSERO_RS19330	FAH family protein	D-Xylose	nonspec	Similar to 2-keto-3-deoxy-L-arabinonate dehydratase, but that would be part of L-arabinose or L-lyxonate degradation instead; the phenotype could be a polar effect
Putida	PP_2672	PP_2672	Transcriptional activator protein ExaE	1-Pentanol	other
WCS417	GFF4198	PS417_21500	C4-dicarboxylate transporter	Sodium succinate dibasic hexahydrate	transporter	succinate transporter (and likely other C4 dicarboxylates as well)

## Sheet: 186 enzymes and transporters
orgId	division	organism	locusId	sysName	class	assigned_function	protein_sequence	SwissProt.hit	SwissProt.%identity	SwissProt.description	agree.SwissProt	agreeComment.SwissProt	KEGG.ortholog	KEGG.description	agree.kegg	agreeComment.kegg	refseqId	refseq.description	agree.refseq	agreeComment.refseq	CLEAN.Predicted	CLEAN.Confidence	agree.CLEAN	agreeComment.CLEAN
acidovorax_3H11	Betaproteobacteria	Acidovorax sp. GW101-3H11	Ac3H11_1623		enzyme	L-lactate dehydrogenase (cytochrome) (EC 1.1.2.3)	VPDLSKITCIEDLRAIAQRRVPRMFYDYADSGSYTEGTYRANESDFQRIKLRQRVAVNMEGRSTRTTMVGQDVAMPVAIAPTGLTGMQHADGEILGAKAAKAFGIPFTLSTMSICSIEDIAEHTGRHPFWFQVYVMRDRDFIERLIDRAKAANCSALQLTLDLQILGQRHKDIKNGLSAPPKPTIANLINLATKPRWCLGMLGTKRRSFGNIVGHAKGVGDLSSLSSWTAEQFDPQLNWGDVEWIKKRWGGKLILKGIMDAEDARLAVNSGADALIVSNHGGRQLDGAPSSIAALPGIADAVAQMGGGIEVWMDGGIRSGQDVLKARALGAQGTLIGRSFLYGLGAYGEAGVTRALQIIQKELDITMAFCGHTNINTVDRSILLPGTYPV	sp|Q329P9|LLDD_SHIDS	44.619	L-lactate dehydrogenase OS=Shigella dysenteriae serotype 1 (strain Sd197) OX=300267 GN=lldD PE=3 SV=1	Yes		K00101	lldD; L-lactate dehydrogenase (cytochrome) [EC:1.1.2.3]	Yes		GCF_001633105.1:WP_063461247.1	alpha-hydroxy acid oxidase [Acidovorax sp. GW101-3H11]	Yes		EC:1.1.99.31	Low	No	(S)-mandelate dehydrogenase
acidovorax_3H11	Betaproteobacteria	Acidovorax sp. GW101-3H11	Ac3H11_2956		enzyme	Dihydropyrimidinase (EC 3.5.2.2)	MTQALVIRGGTVVNADREQRADVLCVDGRIVAVGDGAAAQAPAGAQVLDASGQYVLPGGIDPHTHMQLPFMGTVTMDDFFTGTAAALAGGTTSIIDFVIPDPQEPILDAYRKWRGWAEKSAADYSFHVAITWWSEQVRADMGTLVQQEGVNSFKHFMAYKNAIMCDDETLVNSFKRALELGAMPTVHAENGELVYLLQQEVAKMGITGPEGHPLSRPPMVEAEAANRAIAIADVLGVPIYVVHVSCMESADAIARARARGQRVYGEVLAGHLLVDDSVYRDPDFAKAAAYVMSPPFRPKGHQEALWRGLQSGQLHTTATDHCTFCAAQKAMGKENFAKIPNGTGGVEERMAALWDGGVNTGRLTPSEFVAITSANAAKLFNIYPRKGFIGEGADADLVL…	sp|Q9I676|HYDA_PSEAE	67.708	D-hydantoinase/dihydropyrimidinase OS=Pseudomonas aeruginosa (strain ATCC 15692 / DSM 22644 / CIP 104116 / JCM 14847 / LMG 12228 / 1C / PRS 101 / PAO1) OX=208964 GN=dht PE=1 SV=1	Close	The enzyme from P.aeruginosa does *not* hydrolyze hydantoin but does hydrolyze 5-propyl-hydantoin (PMC4437985); not sure about the physiological relevance of that activity, but the Ac3H11 enzyme might be active on hydantoin	K01464	DPYS, dht, hydA; dihydropyrimidinase [EC:3.5.2.2]	Yes		GCF_001633105.1:WP_063460803.1	dihydropyrimidinase [Acidovorax sp. GW101-3H11]	Yes
acidovorax_3H11	Betaproteobacteria	Acidovorax sp. GW101-3H11	Ac3H11_3035		transporter	Fructose ABC transporter, substrate-binding component FrcB	MQRTPAFALSALALTGALACGLAQAQTSEPVIGLITKTETNPFFVKMKEGATAEAKKLGAKLVSAAGKTDGDNAGQVTAMENLIAAGAKTILITPSDAKAIVPAIKKAQAKGVMVIALDSPTEPMDATDALFATDNYKAGELIGQYAKAAAAGKKPVIATLDLFPGHPVGAQRHNGFLKGFGLQANDAKSNELSRPAEVVCMADSFGDRAKGQTGMENCLQKNPDINIVYTINEPAAAGAYNALKAAGKEKNVLIVSVDGGCAGIADVGKGVIAATSQQYPLRMAAMGVAAGVEYAKTGKKVSGYTDTGVTLIAAKPMAGVDSKDVKTGTDLCWGAK	sp|Q9F9B2|FRCB_RHIML	54.683	Fructose import binding protein FrcB OS=Rhizobium meliloti OX=382 GN=frcB PE=1 SV=1	Yes		K10552	frcB; fructose transport system substrate-binding protein	Yes		GCF_001633105.1:WP_063461944.1	sugar ABC transporter substrate-binding protein [Acidovorax sp. GW101-3H11]	Vague
acidovorax_3H11	Betaproteobacteria	Acidovorax sp. GW101-3H11	Ac3H11_792		transporter	ABC transporter for Glycerol, ATPase component 2	MARISLDLAHSYKPNPQQDSDYALLPLKMEFEDGGAYALLGPSGCGKTTMLNIMSGLLVPSHGKVLFDGRDVTRASPQERNIAQVFQFPVIYDTMTVAENLAFPLRNRKVPEGQIKQRVGVIAEMLEMSGQLNQRAAGLAADAKQKISLGRGLVRADVAAVLFDEPLTVIDPHLKWQLRRKLKQIHHELKLTLIYVTHDQVEALTFADQVVVMTRGKAVQVGSADALFERPAHTFVGHFIGSPGMNFLPAHRDGENLSVAGHRLASPVGRALPAGALQVGIRPEYLALAQPQQAGALPGTVVQVQDIGTYQMLTAKVGEHTVKARFTPETRLPSSGDTAWLQVLGEHTCYYKNEELLA	sp|Q8Z245|UGPC_SALTI	38.938	sn-glycerol-3-phosphate import ATP-binding protein UgpC OS=Salmonella typhi OX=90370 GN=ugpC PE=3 SV=1	Yes		K17325	glpT; glycerol transport system ATP-binding protein	Yes		GCF_001633105.1:WP_063462374.1	ABC transporter ATP-binding protein [Acidovorax sp. GW101-3H11]	Vague
ANA3	Gammaproteobacteria	Shewanella sp. ANA-3	7024897	Shewana3_2071	enzyme	L-arabinose 1-dehydrogenase (EC 1.1.1.46)	MKLTNQYPSLQGKTIFISGGATGIGACLVNAFLEQGAKVAFVDILVEESTQLVADLKQTQPEASVTFYHCDLVDIAALKRVIAQVEDDLGPISVLINNAACDQRHSIDEVTPEYWDQCLNTNLRHYFFAVQAVRPQMQRLGGGSVINLGSMSWHNRQAGMAGYTASKAGAMGLTRGLAADLGKDKIRINTLTPGWVMTKRQLTHWVDKDTAKHIENNQCIKEYVMPEDIAAMALFLAADDSKLCTAQNFIVDGGWI	sp|P0DOV5|SQD_PSEPU	46.457	Sulfoquinovose 1-dehydrogenase OS=Pseudomonas putida OX=303 GN=PpSQ1_00405 PE=1 SV=1	No		K22185	xylB; D-xylose 1-dehydrogenase [EC:1.1.1.175]	No		GCF_000203935.1:WP_011717047.1	SDR family oxidoreductase [unclassified Shewanella]	Vague
ANA3	Gammaproteobacteria	Shewanella sp. ANA-3	7025965	Shewana3_3113	enzyme	Glucosamine-6-phosphate deaminase [isomerizing], alternative (EC 3.5.99.6)	MTNTIMEQEARTAPQKIAGQLAANADLMQQLGEKLRAFDPRFVMIVGRGSSDHAGVFAKYLFEIEAGVPTFAAAPSVASVYGKTLKLEGGLVIVISQSGRSPDILAQARMAKNAGAFCVALVNDETAPIKDIVDVVVPLRAGEEKAVAATKSYLATLSAILQLASAWTQSESLAAAVNSLPQALQTAVDAEPQLTPASVENVKNLVVLGRGLGYAVSKEIALKLKEVCSIHAEAFSSAEFLHGPVTLVEKKLTIVDVCIGDESYASHIEQIENVSQRGADLVHLNQTSTDIHPRVAPLALLQRFYIDVAAVAIARGIDPDQPAGLKKVTQTL	sp|Q5JDU3|GLMD_THEKO	26.295	Glucosamine-6-phosphate deaminase OS=Thermococcus kodakarensis (strain ATCC BAA-918 / JCM 12380 / KOD1) OX=69014 GN=glmD PE=1 SV=1	Yes		K00820	glmS, GFPT; glutamine---fructose-6-phosphate transaminase (isomerizing) [EC:2.6.1.16]	Yes		GCF_000203935.1:WP_011623683.1	SIS domain-containing protein [Shewanella]	Vague		EC:2.6.1.16 EC:5.3.1.27 EC:5.3.1.8 EC:5.3.1.28	Low	Close	2.6.1.16 is right, others (isomerases) seem random but could be true
azobra	Alphaproteobacteria	Azospirillum brasilense Sp245	AZOBR_RS15920	AZOBR_RS15920	transporter	Large component of TRAP-type D-gluconate transporter	MALAVFLSSLFGLMLLGMPIAFALMLTGVALMVHLDFFDAQLVAQNMLSGADNYPLMAVPFFILAGELMNAGGISQRIINLAVSLVGHIRGGLGYVTIGASVMLASLSGSAIADTAALATLLIPMMRDNGYPVPRSAGLIASGGIIAPIIPPSMPFIIFGVTTNTSISGLFMAGIVPGLLMGAGLVITWMFVVRGMTVKLQPKASWGERRTALVEGVWALALPVIIIGGLRGGIFTPTEAAVVAAVYSLVVALFVYRQVTLKDLVPLLVQAARTTSTVMFLCAAALVSSYMVTLADLPQQMNEMLAPLLHEPKLLMVAITLLLLAVGTVMDLTPTILVLGPVLTPLAAAAGIDPTYFGVMFVLTGTLGLIHPPVCTVLNVVCGVARISLESATRGIWPF…	sp|P44993|Y1029_HAEIN	53.176	Putative TRAP transporter large permease protein HI_1029 OS=Haemophilus influenzae (strain ATCC 51907 / DSM 11121 / KW20 / Rd) OX=71421 GN=HI_1029 PE=3 SV=1	Vague	Closest homolog with a substrate annotated is a different one	K21393	yiaN; TRAP-type transport system large permease protein	Vague		GCF_000237365.1:WP_014197389.1	TRAP transporter large permease subunit [Azospirillum]	Vague
azobra	Alphaproteobacteria	Azospirillum brasilense Sp245	AZOBR_RS32335	AZOBR_RS32335	transporter	fructose-specific PTS system (fructose 1-phosphate forming), EII-B'BC components (FruA)	MANMLAVIAAGDLSTQAVLAAEALRKAAAALGHTIQVEVRSSLGVRNTLPTGAAQGAQGVILVGSGDLGEERFAGLKRSAAALDAVLRDARAVLEQALATAPAQAPAQTGTKKIVAITSCPTGIAHTFMAAEGIQQAAQALGHAVRVETQGSVGARDTLTEQEIREADVVLIAADTQVDLARFAGKRVFKSGTKPAINDGRALVERALAEAQPHGTAPALADGVAAGKAAKAEHAAAQRSGPYKHLMTGVSFMLPFVVTGGLLIAIAFALGGIYVFEDSQQGTLGNALFQIGAKGAFALMVPALAGYIAFSIADRPGITPGMVGGILAANLGAGFLGGIVAGFIAGYATSFLNRNIRLHKNLEGLKPVLILPLLGSLVTGLAMIYVVGAPVAEALATLS…	sp|P23355|PTFBC_XANCP	67.808	PTS system fructose-specific EIIB'BC component OS=Xanthomonas campestris pv. campestris (strain ATCC 33913 / DSM 3586 / NCPPB 528 / LMG 568 / P 25) OX=190485 GN=fruA PE=1 SV=2	Yes		K02770	fruA; fructose PTS system EIIBC or EIIC component [EC:2.7.1.202]	Yes	different component lists	GCF_000237365.1:WP_014200190.1	fructose-specific PTS transporter subunit EIIC [Azospirillum]	Yes	BB’C vs. C
BFirm	Betaproteobacteria	Burkholderia phytofirmans PsJN	BPHYT_RS03870	BPHYT_RS03870	enzyme	xanthine dehydrogenase, molybdopterin binding subunit	MNQHAEPFLKDLKELDDFTQVHVSRPHESAHLHVSGRATYTDDIPTLAGTLHAALGLSSKAHAKIVSISLDKVRATPGVVAIFTADDIPGVNDVGPIIHGDDPILADGLVQYIGQPIFIVVATSHDTARLAARRADIVYEELPAILTAQQARAANQHVLPPMKLARGEADTKIARAAHREAGEMLLGGQEQFYLEGQISYAVPKDDDGMHVYCSTQHPTEMQHMVAHALGVASHNVLIECRRMGGGFGGKESQSGLFACCAALAAWKLLCPVKLRPDRDDDMMVTGKRHDFHYTYEVGYDDKGVIDGVTVDMTSRCGFSADLSGPVMTRALCHFDNAYWLSDVTIDGFCGKTNTQSNTAFRGFGGPQGAFAIEYIMDNVARSVGEDSLDVRRRNLYGKT…	sp|Q46799|XDHA_ECOLI	28.516	Putative xanthine dehydrogenase molybdenum-binding subunit XdhA OS=Escherichia coli (strain K12) OX=83333 GN=xdhA PE=2 SV=1	Yes		K13482	xdhB; xanthine dehydrogenase large subunit [EC:1.17.1.4]	Yes		GCF_000020125.1:WP_012431852.1	xanthine dehydrogenase molybdopterin binding subunit [Paraburkholderia phytofirmans]	Yes
BFirm	Betaproteobacteria	Burkholderia phytofirmans PsJN	BPHYT_RS16725	BPHYT_RS16725	transporter	gluconate:H+ symporter (gntT)	MEAVHGSTLLVFAVIAIALLILLITRYKVYPFLVLIIVSLLLGLASGMPMATIVKSFETGNGNTLGHIAIVVGLGTMLGKMMAESGGAERIATTLIDFFGEKNIHWAMMIVAIIVGLPVFFEVGFVLLIPIAFNVAKRTNKSLLLVGLPMVAGLSVVHGLLPPHPAAMLAVQAYHADIGRTIAYGLIVGVPTAIVAGPLFALMISRYIKLPKENALAAQFLGHGDETKNGAQTAAQNVAPKRELPSFGITLLTILLPVILMLVGSWADLFTTPKTLPNDLLHFAGNSDVALLIAVLVSFWTFGASRGFTREQIQKFCGDCLAPIAGITLIVGAGGGFGRVLMDSGISKEIVNVATAMHLSPLLFGWLVAALIRLATGSATVAMTTACGIVAPIASASGV…	sp|Q9Z670|GNTP_ZYMMO	48.807	Gluconate permease OS=Zymomonas mobilis subsp. mobilis (strain ATCC 31821 / ZM4 / CP4) OX=264203 GN=gntP PE=3 SV=1	Yes		K03299	TC.GNTP; gluconate:H+ symporter, GntP family	Yes		GCF_000020125.1:WP_012434323.1	GntP family permease [Paraburkholderia phytofirmans]	Vague
BFirm	Betaproteobacteria	Burkholderia phytofirmans PsJN	BPHYT_RS19330	BPHYT_RS19330	enzyme	glycine cleavage system P protein (EC 1.4.4.2), important on glycine and related compounds	MKLEHPDRLMNRTPLSLAALEVHDAFAERHIGPDAADQHAMLEALGFASRAALIDAVIPKTIRRTETLPLGPFTQPKSEAEALAALRELADKNQVFRSYIGQGYYNAHTPTVILRNVLENPAWYTAYTPYQPEISQGRLEALLNFQQMIVDLTGLAISNASLLDEATAAAEAMTLLQRVGKPKSNVFFVADDVLPQTIEVVRTRATPVGIEVKVGPASEAANANAFGVLLQYPGVNGDVRDYRALTEAIHAAGGHVVVAADLLALTVLTPPGEWGADVAVGNTQRFGVPVGFGGPHAAYLAVRDEFKRQMPGRLVGVTVDAQGNPALRLALQTREQHIRREKATSNVCTAQALLAIMASMYAVYHGPHGLKTIALRVNRIAALLAEGAKQLGYTLANET…	sp|B2T7I8|GCSP_PARPJ	100	Glycine dehydrogenase (decarboxylating) OS=Paraburkholderia phytofirmans (strain DSM 17436 / LMG 22146 / PsJN) OX=398527 GN=gcvP PE=3 SV=1	Yes		K00281	GLDC, gcvP; glycine cleavage system P protein (glycine dehydrogenase) [EC:1.4.4.2]	Yes		GCF_000020125.1:WP_012434789.1	aminomethyl-transferring glycine dehydrogenase [Paraburkholderia phytofirmans]	Yes		EC:1.4.4.2	High	Yes
BFirm	Betaproteobacteria	Burkholderia phytofirmans PsJN	BPHYT_RS22245	BPHYT_RS22245	transporter	MctP, transporter for D-alanine, D-lactate, pyruvate	MSDVNPVNPVAMTVFIAFFVLVTVIGFFAARWKRGDLTQLHEWGLGGRQFGTVISWFLVGGDFYTAYTVIAVPALVYSVGAYGFFALPYTIIVYPFVFAVMPKLWKIAHAKNHITAADYVQGEYGGKWFPAAVAITGIVATMPYIALQLVGMQVVIKGLGVTGEMPLIVAFVILALYTYASGLRAPAMIAFVKDIMIYIVVIAAVWLIPAKLGGYAHVFDAADTYFKAKGGATGIILKPTQFTAYASLALGSALAAFMYPHTMTAVLSSSSANTVRKNAIFLPAYTLLLGLIALLGYMAIAAGVHVKSASDMVPALFNTLFPSWFVGFAAAAIAISALVPAAIMSIGAANLFTRNLWRPLVSPNISPEGEASTAKIVSLVVKFGALLFIVFLPTQYAID…	sp|Q1M7A2|MCTP_RHIL3	65.801	Monocarboxylate transport permease protein OS=Rhizobium leguminosarum bv. viciae (strain 3841) OX=216596 GN=mctP PE=1 SV=1	Yes	Function field says “Low-affinity transporter of alanine and high-affinity transporter of lactate and pyruvate”	K03307	TC.SSS; solute:Na+ symporter, SSS family	Vague		GCF_000020125.1:WP_012426371.1	sodium:solute symporter [Paraburkholderia phytofirmans]	Vague
Btheta	Bacteroidetes	Bacteroides thetaiotaomicron VPI-5482	349800	BT0272	transporter	TonB-dependent receptor for (+)-arabinogalactan (SusC-like)	MRNIFKYGLLAMAIAVTSVGVRAQDIPVSGVVKDKSNNSTLPYASVIVKNESGKTVPQLSTTTDDNGRFSTKVKSGYRLVFSFLAFDSLSVKVTKPSERMQIYLSPTENMLDETVVVGFKRVSKAAVTASVTVIKAEDLVNTPVANPMELLQGRVPGLNIQMNNGTPGGLPSFSIRGVSDISVQSSGDGEFMMGLTPPLFVVDGIPQEDVTGYDAAGLLSGATVSPLAMIPLEDIANIQVLKDAAATSLYGSKGAYGVILIETKRGETAKPKVSYSANFVVKTPPRLRDVLAGGAERALRIMQILGNDTSAYHGYNEIHKLQALSDSLNPYYNNNTDWQGVFYQTTYNQTHNLSFSGKPNEKFDYKINANYYTEKGIVKNTDFNRYGIRAAVGYKPNDR…	sp|Q8A1G1|SUSC_BACTN	25.244	TonB-dependent receptor SusC OS=Bacteroides thetaiotaomicron (strain ATCC 29148 / DSM 2079 / JCM 5827 / CCUG 10774 / NCTC 10582 / VPI-5482 / E50) OX=226186 GN=susC PE=1 SV=1	No	Function: “Mediates transport of starch oligosaccharides”			Vague		GCF_000011065.1:WP_008766183.1	TonB-dependent receptor [Bacteroides thetaiotaomicron]	Vague
Btheta	Bacteroidetes	Bacteroides thetaiotaomicron VPI-5482	350647	BT1119	transporter	TonB-dependent receptor for D-galacturonate and 1,4-beta-D-galactobiose (SusC-like)	MGRVSLCLVIMFFICSAQKIDAQVQNIREKQDTISATKSLEHIRPENIKKGPLNNALDVLSGQSAGVNVTTNGTDRLAMLNSIRVRGTTSIMGGNDPLVIIDGVTSDIATLSTIYPADIESFTILKNATETAMYGSRGASGVIEIKTKKGTGRGFEISYDGNYGFESMYKHLQMLNGPEYIATAEALGLDYNNGGYNTNFHDVITRTGLIHQHHLAFSGGSENSNYRASFGFMDHNTIVKVNDYRNLVVKLDATQKAFDGRLVGDFGVYGYSSKIHDIFDTRMLFYSAAAQNPTYPAGTDVNGNWVKNSAASHINHPGALLYEKNDSEERNFNTHLGLKFNILDNLILSAFGSYSYSSTGNAQFCPTWVWAQGNVYRGEFKGEDYFTNVSLSYNNAWGD…	sp|T2KPJ3|PLH3_FORAG	30.022	TonB-dependent receptor P3 OS=Formosa agariphila (strain DSM 15362 / KCTC 12365 / LMG 23005 / KMM 3901 / M-2Alg 35-1) OX=1347342 GN=BN863_21920 PE=2 SV=1	No	Function field says “probably involved in ulvan degradation”; ulvan does not contain fructose			Vague		GCF_000011065.1:WP_008765337.1	SusC/RagA family TonB-linked outer membrane protein [Bacteroidales]	Vague
Btheta	Bacteroidetes	Bacteroides thetaiotaomicron VPI-5482	351290	BT1762	transporter	Fructo-oligosaccharide transporter (SusD component) [from biochemical evidence]	MKKIIYIATIGITLLTTSCDDFLDRQVPQGIVTGDQIASPEYVDNLVISAYAIWATGDDINSSFSLWNYDVRSDDCYKGGSGTEDGGVFNALEISKGINTTDWNINDIWKRLYQCITRANTALQSLDQMDEKTYPLKNQRIAEMRFLRGHAHFMLKQLFKKIVIVNDENMEPDAYNELSNTTYTNDEQWQKIADDFQFAYDNLPEVQIEKGRPAQAAAAAYLAKTYLYKAYRQDGADNALTGINEEDLKQVVKYTDPLIMAKGGYGLETDYSMNFLPQYENGAESVWAIQYSINDGTYNGNLNWGMGLTTPQILGCCDFHKPSQNLVNAFKTDSQGKPLFSTYDNENYEVATDNVDPRLFHTVGMPGFPYKYNEGYIIQKNDDWSRSKGLYGYYVSLKE…	sp|A7LXT5|SUSD_BACO1	25.239	SusD-like protein BACOVA_02651 OS=Bacteroides ovatus (strain ATCC 8483 / DSM 1896 / JCM 5824 / BCRC 10623 / CCUG 4943 / NCTC 11153) OX=411476 GN=BACOVA_02651 PE=1 SV=1	No	Function field says “Probably mediates xyloglucan-binding”	K21572	susD; starch-binding outer membrane protein, SusD/RagB family	No		GCF_000011065.1:WP_008767780.1	RagB/SusD family nutrient uptake outer membrane protein [Bacteroides]	Vague
Btheta	Bacteroidetes	Bacteroides thetaiotaomicron VPI-5482	352336	BT2809	transporter	D-ribose transporter	MYIVNSYTLAIIFCFITMICWGSWGNTQKLASKNWRYELYYWDYTIGILLFALLLVFTLGSFGDSGRGFLEDIQQVEAAYIASALIGGAIFNASNILLSASVSIAGMAVAFPLGVGLALVLGVFINYFSSPKGDPFWLFTGVVLIVIAIICNGIAAGKNQKAGTNNSKKGIILAAIAGILMSFFYRFVAAAMDLNNFESPTTGMATPYTAFFIFAIGIFLSNFLFNTLVMKRPFVGLPVTYKEYFAGKASTHMVGILGGCIWGLGTALSYIAAGKAGAAISYALGQGAPMIAALWGVFIWKEFTGSSKATNRLLGVMFILFILGLTFIVISGGS	sp|Q9ZPR7|UPS1_ARATH	24.103	Ureide permease 1 OS=Arabidopsis thaliana OX=3702 GN=UPS1 PE=1 SV=1	No		K05340	glcU; glucose uptake protein	No		GCF_000011065.1:WP_011108492.1	GRP family sugar transporter [Bacteroides]	Vague
Btheta	Bacteroidetes	Bacteroides thetaiotaomicron VPI-5482	352867	BT3340	enzyme	Beta-galactosidase	MKKQLLSCCLAALGLTTAIQAQNFNEWKDPEVNSVNRSAMHTNYFAYASADEAKAGSKEDSQNFMTLNGLWKFNWVRNADARPTNFYQTSFNDKGWDNIKVPAVWELNGYGDPIYVNVGYAWRNQFQNNPPLVPTENNHVGSYRKEIVLPADWKGKDIFAHFGSVTSNMYLWVNGRYVGYSEDSKLEAEFDLTNYLKPGKNLIAFQVFRWCDGSYLEDQDFFRYSGVGRDCYLYARDKKRIQDIRVTPDLDSQYKDGTLNIAIDMKGSGTVALDLTDAQGKSVATADLKGSGKLNTTINVANPAKWTAETPNLYTLTATLKNGSTVTEVIPVKVGFRKIELTGGQILVNGQPVLFKGADRHEMDPDGGYVVSLERMIQDIKVMKQLNINAVRTCHYPDD…	sp|Q56307|BGAL_THEMA	38.802	Beta-galactosidase OS=Thermotoga maritima (strain ATCC 43589 / DSM 3109 / JCM 10099 / NBRC 100826 / MSB8) OX=243274 GN=lacZ PE=1 SV=2	Yes		K01190	lacZ; beta-galactosidase [EC:3.2.1.23]	Yes		GCF_000011065.1:WP_011108778.1	glycoside hydrolase family 2 TIM barrel-domain containing protein [Bacteroides thetaiotaomicron]	Vague		EC:3.2.1.23	Low	Yes
Btheta	Bacteroidetes	Bacteroides thetaiotaomicron VPI-5482	353224	BT3698	enzyme	Alpha-amylase susG	MNKHLHFLSLLWLSMLMAFMTACSDDKNITDPAPEPEPPVEGQWTALTASPDTWDETKRADISYQLLLYSFADSDGDGYGDLNGVTQKLDYLNQLGVKALWLSPIHPCMSYHGYDVTDYTKVNPQLGTESDFDRLVTEAHNRGIKIYLDYVMNHTGTAHPWFTEASSSSESPYRNYYSFSEDPKTDIAAGKIAMITQEGAAGYNAAEWFQVSDETAAVKGLLKFTLDWSNAPSPILVVSTGTKADEDNPDTGTDNAKYLYYGEDICKKFYDKGNNIYELTVDFESTWGLLIRTSNASFWPSGTKYGASSSSEKLALNKDFKLTNAGNPANIMFDSQQITYFHSHFCTDWFADLNYGPVDQAGESPAYQAIADAAKGWIARGVDGLRLDAVKHIYHSETS…	sp|Q8A1G3|SUSG_BACTN	100	Alpha-amylase SusG OS=Bacteroides thetaiotaomicron (strain ATCC 29148 / DSM 2079 / JCM 5827 / CCUG 10774 / NCTC 10582 / VPI-5482 / E50) OX=226186 GN=susG PE=1 SV=1	Yes		K01176	AMY, amyA, malS; alpha-amylase [EC:3.2.1.1]	Yes		GCF_000011065.1:WP_011108937.1	alpha-amylase SusG [Bacteroides thetaiotaomicron]	Yes		EC:3.2.1.1	Low	Yes
Burk376	Betaproteobacteria	Paraburkholderia bryophila 376MFSha3.1	H281DRAFT_03961	H281DRAFT_03961	enzyme	xanthine dehydrogenase, small subunit	MAIYVREAGFGATPCVTRARSALSSGFAMTTQTIRFYRQGSVHEVSGVPASRTVLQHLREDLHCTGTKEGCAEGDCGACTVVIGELDAQGALALKAVNACIQFLPTLDGKALFTVEDLRAADGTLHPVQQAMVDCHGSQCGFCTPGFVMSMWALYENQPAAAGLPTRDEINTALSGNLCRCTGYRPIVDASQKMFDYAQYPRVTLDRKAVEETLRALQRNDTFEYRAPDARGAAFGAPAFYAPLTLDAFARLRAEHPQARLVAGSTDVGLWVTKQFRDLGDVLYIGNVRELKTIERDAQTLTIGAAVTLEDAYAALAADYPELAELWTRFASLPIRNAGTLGGNVANGSPIGDSMPALLALGAEVVLRHGTKTRTLPLDGFYLGYQKTALAAGEFVAAL…		NA				K13481	xdhA; xanthine dehydrogenase small subunit [EC:1.17.1.4]	Yes		GCF_000383275.1:WP_020069011.1	xanthine dehydrogenase small subunit [Paraburkholderia caledonica]	Yes		EC:1.2.99.6	Medium	No	carboxylate reductase
Caulo	Alphaproteobacteria	Caulobacter crescentus NA1000	CCNA_00650	CCNA_00650	transporter	prob. Nitrate transport only (similar to nasA) but could be nitrate/nitrite antiporter (29% id to Q9RA46)	MLSREFLKAGHAPTLFAAFLYFDLSFMVWVILGPLGVAIAKDFNLDPAQKGLMVAVPVLAGAVLRLVNGVLVDRIGPKKTGIIGQLIVLAGLVTAWAVGLHNYQQILALGLVLGVAGASFAVALPLASRWYPQEHQGLALGIAGAGNSGTALAALFAPALAKTFGWQNVIGLAAIPLAFAFVAYLVLAKDAPEQPAPKKLAEYLDVLKVPDAWWLMLLYGVTFGGFVGLASSLTMYFNSEYGLDPVIAGFFTAACVFAGSFIRPVGGALADRYGGVRTLGVVYVLAAIGLTVAGFQLPSAGLALAVLLFAMLALGAGNGAVFQLAPQRFRNEIGVMTGLIGMTGGIGGFYLASTLGLAKKMTGSYQSGFIGFALLAVFALIALFSLKARWRAVWPTLHG…	sp|P42432|NASA_BACSU	51.485	Nitrate transporter OS=Bacillus subtilis (strain 168) OX=224308 GN=nasA PE=2 SV=2	Yes		K02575	NRT2, narK, nrtP, nasA; MFS transporter, NNP family, nitrate/nitrite transporter	Close		GCF_000022005.1:YP_002516023.2	MFS superfamily nitrate/nitrite transporter NarK [Caulobacter vibrioides NA1000]	Close	might not be a nitrite transporter
Caulo	Alphaproteobacteria	Caulobacter crescentus NA1000	CCNA_01194	CCNA_01194	transporter	TonB-dependent receptor for sucrose (sucA, see PMID:30054816) and raffinose (raffinose is probably cleaved in the cytoplasm by CCNA_02368)	MNRQKSRLLVGAAVLAMLPLAAHAQQSVTKNDQDVLELDAVVITASRDGATKMNSSISVSALSADQILAQAPRSTAEIFRGLPGVRSEATGGDGNANIAVRGLPVASGGAKFLQLQEDGLPVMEFGDIAFGNADIFLRADQNVARIESVRGGSSSTFASNSPGGVINFISKTGEVEGGEIALTKGLGYDHTRLDFDYGAPLSDTLRFHVGGFYREGEGARKSGYTSEKGGQIKANLTKDFENGFIRLNVKYLNDRAVGYLPMPTRVTGSNGDPDIGSFAGYDIGRDDLQSIYLARNPGLDGDGNRRISKVADGMHPDTLQFGAEAKFDIGGWKIEDRFKVAKTSGRFVAPFPAEVLSAQALATSIGGAGATLRYANGPSAGQAITAPGSLNGNGLAMRI…		NA						Vague		GCF_000022005.1:YP_002516567.1	TonB-dependent receptor SucA [Caulobacter vibrioides NA1000]	Yes	you have to find the paper about SucA to understand
Cola	Bacteroidetes	Echinicola vietnamensis KMM 6221, DSM 17526	Echvi_1890	Echvi_1890	enzyme	this must be moeA, molybdopterin molybdotransferase (EC 2.10.1.1); there’s another protein with this domain but no relevant phenotypes (molybdenum cofactor is required for nitrate reduction)	MITINEALQAVLDQRHAYGTEEITLSKSIGRHLAEDIFTDRDAPPFDRVMMDGIAIQLGHIENPFQSSYAIQGIQAAGAPKMELLGPDHCLEVMTGAILPAGADTIIPYEEIEIKDGNAHIQLEKAAKRYVHYRGSDSMKGEKIISKGKLLTAADIGILATVGKTTVSVAKLPSVAIVSTGDELVDVDQAPLPHQIRKSNVHSLCAALAQQGIHGEMYHINDDKEALQKTLSKLIEEFDVLLLSGGVSKGKFDHIPAVLDDLGVKKLFHRVAQRPGKPFWFGHHDKQSTKIFAYPGNPVSTYVNHLFYFQQWLHASLGNPIRLEVKALGEKVPGNPNLSRFLSVRLDPQTGQALPFNHNGSGDLFSLTETDGFLLLPQRDGDFLAGEQLEFLHVL	sp|Q55368|MOEA_SYNY3	38.287	Molybdopterin molybdenumtransferase OS=Synechocystis sp. (strain PCC 6803 / Kazusa) OX=1111708 GN=moeA PE=3 SV=1	Yes		K03750	moeA; molybdopterin molybdotransferase [EC:2.10.1.1]	Yes		GCF_000325705.1:WP_015265706.1	molybdopterin molybdotransferase MoeA [Echinicola vietnamensis]	Yes		EC:2.10.1.1	High	Yes
Cola	Bacteroidetes	Echinicola vietnamensis KMM 6221, DSM 17526	Echvi_2921	Echvi_2921	enzyme	predicted 3-ketoglycoside hydrolase (DUF1080)	MKLNLLFPVLAGSMLAVPVMAQHDPIQLPPQATEVWEPVPPVVTPGEENHMPPSDAIVLFDGSDLSAWKSVKTGGEAEWTVHDGIFTVKPGTGEIATKEKFGDVQVHIEWKAPDVVKGEGQGRGNSGLFFCERYEVQILDSYQNRTYSNGQAASLYKEGIPLANAMRSPQEWNTYDVFFTAPRFNKDGMVISPAYVTVIHNGVLVQNHYEVKGSTAYIGVHKYEAHETELPIKLQDHGNLVNFRNIWVRKL		NA						Vague		GCF_000325705.1:WP_015266711.1	DUF1080 domain-containing protein [Echinicola vietnamensis]	Vague
Cola	Bacteroidetes	Echinicola vietnamensis KMM 6221, DSM 17526	Echvi_3375	Echvi_3375	enzyme	predicted 3-ketohexose reductase	MTKTIKAAIVGTGFIGPAHLEALRRIPNIEVIALCEVNQELAEEKAKLLGIPQAFTFEEMLKQPEIEVVHICTPNFLHYNQSKAALEAGKHVVCEKPLATKIDEAEALVALAKEKGLVNAVHFNLRYYPMVRQMKTMRENGELGDIYSIMGSYLQDWLYLNTDYNWRLEPDKSGDSRAIADIGSHLLDLTEYVTGLKITEVMADFSTVHKTRLKPLKPIETYSGKMLQESDYEEVPINTEDHATVLLRFDNGNKGSVTVSQVNAGRKNRLNIEIAGSKSNFEWCSERPNEMWIGKRESPNQQLMKDPALFTPEAAGLISFPGGHNEGFPDTSKQMFKEVYAAVAAGKQPENPSFPTFKDGYRELLICERIIESNQKQAWVKI	sp|F0M433|LGDH_PSEPM	31.156	Levoglucosan dehydrogenase OS=Pseudarthrobacter phenanthrenivorans (strain DSM 18606 / JCM 16027 / LMG 23796 / Sphe3) OX=930171 GN=lgdh PE=1 SV=1	No				Vague		GCF_000325705.1:WP_015267141.1	Gfo/Idh/MocA family oxidoreductase [Echinicola vietnamensis]	Vague		EC:1.1.1.371	Low	No	scyllo-inositol 2-dehydrogenase (NADP(+))
Cup4G11	Betaproteobacteria	Cupriavidus basilensis FW507-4G11	RR42_RS23735	RR42_RS23735	enzyme	phenylacetyl-CoA 1,2-epoxidase, structural subunit	MTTPQHLSYVLRLADNALILGQRNSEWCSQGPALEEDIALANISLDLIGQARLLYSHAATLDEALNGARKTEDSYAYFRAEREFANYTLVELPHFGPLAGTARAERDYAVTITRNFLYSALMGHLWTALQSSTDTHLAAIAAKSLKETRYHLTHAADWLIRFGDGTEESHRRAQAALDYLMPYTREFFAADAVETAVAAAGIGPLMADLQPAWQADVAATVAQATLTLPSEAKHITTGKHGEHSEHMGYLLSEMQSLARQHPGATW	sp|P76079|PAAC_ECOLI	43.511	1,2-phenylacetyl-CoA epoxidase, subunit C OS=Escherichia coli (strain K12) OX=83333 GN=paaC PE=1 SV=1	Yes		K02611	paaC; ring-1,2-phenylacetyl-CoA epoxidase subunit PaaC [EC:1.14.13.149]	Yes		GCF_000832305.1:WP_043353526.1	phenylacetate-CoA oxygenase subunit PaaC [Cupriavidus basilensis]	Yes
Cup4G11	Betaproteobacteria	Cupriavidus basilensis FW507-4G11	RR42_RS31785	RR42_RS31785	enzyme	Nitrite reductase (NAD(P)H) (EC 1.7.1.4)	MKLIIIGHGMVGHKFLECLAEAGSQDLEVTVLCEEPRPAYDRVHLSEFFAGKSAEDLSLVEAGFFERSNMLLRLNARATGIDRAAKTVTVSTGETLSYDKLIMATGSYPFVPPLPGKDRKDCFVYRTIEDLEAMQECGARSRTGVVIGGGLLGLECAKALRDMGLQTHVVEFAPRLMAVQVDDGGGAMLRRKIEELGVTAHTRKNTVEIVDGEDGTHRMNFADGSHLDTDMIVFSAGIRPRDELARASGLAIGERGGIAVDNQCLSSDPDVYAIGECALWDGKIYGLVAPGYEMARVAAKHLLGHRAEFAGADMSTKLKLMGVDVASLGDPHGNAPGSRSFQFTDERKQVYKKLVVSECGKYLLGGVLVGDAEEYGTLLQMMLNKIELPESPEFLILPS…	sp|P08201|NIRB_ECOLI	62.23	Nitrite reductase (NADH) large subunit OS=Escherichia coli (strain K12) OX=83333 GN=nirB PE=3 SV=4	Yes		K00362	nirB; nitrite reductase (NADH) large subunit [EC:1.7.1.15]	Yes		GCF_000832305.1:WP_043355847.1	nitrite reductase large subunit NirB [Cupriavidus basilensis]	Yes		EC:1.7.1.4	High	Yes
Cup4G11	Betaproteobacteria	Cupriavidus basilensis FW507-4G11	RR42_RS32065	RR42_RS32065	enzyme	protocatechuate 3,4-dioxygenase, beta subunit [EC: 1.13.11.3]	MADSPIKLPPGLAQYRRHYWDTQPEYRFDPYGSTALRSPNEPLVALNQTLSEVTGPLFGAEFVRNGDSDLTAGHAGEPIGERILVSGRVLDENGRPVPNALIEVWQANAAGRYVHKRDQHDAPLDPNFTGEGRAVTDAQGRYQFKTIKPGAYPWRNHHNAWRPQHIHFSLFGNAYATRLVTQMYFPGDPLLAFDPIFNCVPDAKARDRLVSTFDWETTVPEYALGYRFDIVLRGRDATPME	sp|P15110|PCXB_BURCE	62.241	Protocatechuate 3,4-dioxygenase beta chain OS=Burkholderia cepacia OX=292 GN=pcaH PE=3 SV=1	Yes		K00449	pcaH; protocatechuate 3,4-dioxygenase, beta subunit [EC:1.13.11.3]	Yes		GCF_000832305.1:WP_043355917.1	protocatechuate 3,4-dioxygenase subunit beta [Cupriavidus]	Yes		EC:1.13.11.3	High	Yes
Dino	Alphaproteobacteria	Dinoroseobacter shibae DFL-12	3607308	Dshi_0723	enzyme	Propionyl-CoA carboxylase biotin-containing subunit (EC 6.4.1.3)	MFKKILIANRGEIACRVIKTARKMGIQTVAIYSDADRNALHVRMADEAVHIGPSPANQSYIVIDKVMDAIRQTGAEAVHPGYGFLSENKLFAEALEKEGVAFIGPPANAIEAMGDKITSKKIAQEANVSTVPGYMGLIADADEAVKISGEIGYPVMIKASAGGGGKGMRIAWNDAEAREGFQSSKNEAANSFGDDRIFIEKFVTQPRHIEIQVLADTHGNCIYLGERECSIQRRNQKVVEEAPSPFLDEATRKAMGEQSCALAQAVGYASAGTVEFIVDGDRNFYFLEMNTRLQVEHPVTELITGVDLVEQMIRVAAGEKLPMTQDDVTLTGWAIENRLYAEDPYRNFLPSIGRLTRYRPPVEVAAGPLEANGKWHGDAPSGPTAVRNDTGVYEGGEIS…	sp|Q5LUF3|PCCA_RUEPO	84.728	Propionyl-CoA carboxylase alpha chain OS=Ruegeria pomeroyi (strain ATCC 700808 / DSM 15171 / DSS-3) OX=246200 GN=pccA PE=1 SV=1	Yes		K01965	PCCA, pccA; propionyl-CoA carboxylase alpha chain [EC:6.4.1.3]	Yes		GCF_000018145.1:WP_012177400.1	acetyl/propionyl/methylcrotonyl-CoA carboxylase subunit alpha [Dinoroseobacter shibae]	Vague		EC:6.4.1.3	High	Yes
Dino	Alphaproteobacteria	Dinoroseobacter shibae DFL-12	3608607	Dshi_2000	transporter	xylitol transporter; may also be a glucose transporter (weak phenotypes in Dino, and a close homolog is a glucose transporter) and a xylose transporter (Dino grows poorly on xylose, and no fitness data, but 66% id. to a glucose/xylose transporter from Agrobacterium)	MRKAILAAAIVAAGVTTSAYADVTVGVSWSNFQEERWKTDEAAIKAALEAAGATYVSADAQSSSAKQLSDVESLIAQGVDALIILAQDSQAIGPAVQAAADEGIPVVGYDRLIEDPRAFYLTFDNVEVGRMQARAVLEQAPEGNYVMIKGSPTDPNADFLRGGQQEILQDAIDAGKITIVGEAYTDGWLPANAQRNMEQILTAQDNQVDAVVASNDGTAGGVVAALTAQGMEGIPVSGQDGDHAALNRVAKGTQTVSVWKDARDLGRAAGEIAVAMANGTAMADIEGATSWTSPGGTELTARFLAPVPVTADNLTAVVDAQWITQETLCQGVTDGPAPCN	sp|P37387|XYLF_ECOLI	39.935	D-xylose-binding periplasmic protein OS=Escherichia coli (strain K12) OX=83333 GN=xylF PE=1 SV=1	Close	It may well be a xylose transporter as well	K10543	xylF; D-xylose transport system substrate-binding protein	Close	May well be a xylose tarnsporter as well	GCF_000018145.1:WP_012178670.1	D-xylose ABC transporter substrate-binding protein [Dinoroseobacter shibae]	Close
Dino	Alphaproteobacteria	Dinoroseobacter shibae DFL-12	3609574	Dshi_2958	enzyme	Xanthine dehydrogenase (EC 1.17.1.4)	METTFLLNGETVRVADEAPTRTLLDWLRERRGLTGTKEGCNEGDCGACTVIVSDADGPRTLNACILFLPQLQGKAVRTVEGISGPDGSLHPVQAAMVAHHGSQCGFCTPGFIAAMACAHTRGETDHADQLAGNLCRCTGYAPILRAAEAAAEAPVPDWMAEPALPHIQEDTSFTAVREDTSLNAVREDTTAGAEAGVDALWAQPRSSDALAAWYAEHPDATLVAGATDVGLWVTKQLRELAPIAFLNRCDDLKTIETTDTHWRLGAMVTISALLETVRAEHPSFAEMLRRYGSVQVRNAATLGGNIANGSPIGDSPPPLIALGATLHLRKGDSRREMPLEDFFLAYGNQDRAPGEFVEAITIPRGHDGLRVYKLSKRMDQDISAVCGAFNITLAEGRVT…		NA				K13481	xdhA; xanthine dehydrogenase small subunit [EC:1.17.1.4]	Yes		GCF_000018145.1:WP_012179619.1	xanthine dehydrogenase small subunit [Dinoroseobacter shibae]	Yes
Dino	Alphaproteobacteria	Dinoroseobacter shibae DFL-12	3609821	Dshi_3204	enzyme	allantoinase (EC 3.5.2.5)	MNRYPRDLTGYGATPPTVTWPGGAKIAVQIVLNYEEGGENNILHGDAASEAFLSEITGAAPWPGQRHWNMESIYEYGARAGFWRVHRLLKDLPVTVYGVATALARAPAQVAAMKASGWEIASHGLKWVEHKDMDPEQERAQIREAIQLHTEVTGSAPRGWYTGRCSMNTVDLAAEEADLAYIADSYADDLPYWIRAGGKDQLIVPYTMDCNDMRFAIQAGYTNGDQFESYLKDSFDMLYAEGEAGHPAILSIGLHCRLIGRPGRAMALKRALEHFRKHEGVWFATREQIADHWAQQHPPAAQRRPSEMDRDSFVAAFGGIFEHSPWIAEGAHALELGPTHDNAAGVHNALCRIFRGASEAQRLSVLTAHPDLAGKLAAAGKLTAESTAEQAGAGLDLLT…		NA				K16842	hpxB; allantoinase [EC:3.5.2.5]	Yes		GCF_000018145.1:WP_012179864.1	allantoinase PuuE [Dinoroseobacter shibae]	Yes
DvH	Deltaproteobacteria	Desulfovibrio vulgaris Hildenborough JW710	207726	DVU2242	enzyme	asparaginase	MTRPRIIVHGGAWTIPADRQEAHIAGCRRAVEAAWPLLRDGATAVEAVRAAVNVLEDDPTFDAGRGAVLNRDGVIELDAAIMDGATLDFGGVAAVRRFANPVDIARRLLDTEFCLLVGEGAERFALEQGLKPVDPATLLVERERLLYETLRSRAGYSTHDAFRPVTDTAPAGDVPKGTVGAVALDIHGNVAAATSTGGTPFKLAGRVGDSPLCGAGTYADNETGGASATGFGEGVMRTLMTHCACEHLRECLPDEAARRAIDMLHRRVGGHAGLIMLDRHGRYGVHCNTDHIAHAYARADGTVHASVTPDPVTGE	sp|Q32LE5|ASGL1_BOVIN	40.645	Isoaspartyl peptidase/L-asparaginase OS=Bos taurus OX=9913 GN=ASRGL1 PE=2 SV=1	Close	No idea If the isoaspartyl peptidase activity is likely	K13051	ASRGL1, iaaA; L-asparaginase / beta-aspartyl-peptidase [EC:3.5.1.1 3.4.19.5]	Close		GCF_000195755.1:WP_010939517.1	isoaspartyl peptidase/L-asparaginase family protein [Desulfovibrio vulgaris]	Vague		EC:3.4.19.5	High	No	beta-aspartyl-peptidase
DvH	Deltaproteobacteria	Desulfovibrio vulgaris Hildenborough JW710	208171	DVU2672	transporter	glycine transporter	MQDMLYALDIFGTFAFAVAGALKAARHELDALGVLVLATVTGVGGGMVRDMMLAYGPPAVFHNDAYLLVCLAGGLLVFFFARGVAARRNLVRYADAVGLGVFTAIGGAKAMAFGLGGLPVVFLAVLTATGGGVIRDVLVGEVPAVLRTDFYATASILGAVALLGLAALGRPPLEQLAGSAAVTTGLRLMAIWLRMRLPRIPRVDDDD	sp|O86576|Y5481_STRCO	42.132	UPF0126 membrane protein SCO5481 OS=Streptomyces coelicolor (strain ATCC BAA-471 / A3(2) / M145) OX=100226 GN=SCO5481 PE=3 SV=1	Vague				Vague		GCF_000195755.1:WP_010939941.1	trimeric intracellular cation channel family protein [Desulfovibrio]	Vague
DvH	Deltaproteobacteria	Desulfovibrio vulgaris Hildenborough JW710	209488	DVU0549	transporter	proline and maybe arginine uptake	MQGIIKSLQVGLWFMFLTFPLMVIRVDTLNGTVDWRWQNMVMMGLGTFALSFLWRYMLARKEAGGASARQGNAAAGGLMARVRSDARLRTPALLAVLVVFAVLPMLVSTYQTNIMISALLYVMLGLGLNIVVGLSGQLVLGYVAFYAVGAYAYALLNADFGLGFWTVLPIGGALAAVFGILLGFPVLRLKGDYLAIVTLGFGEIVRLVLENWGSVTRGPSGISKIARPGLFGMELSVSEATTYIYYLILAAVIFTIFAVGRLKDSRIGRAWQALREDEIACEAMGIDLTTTKLTAFALGACWAGFAGVIFAAKTTFINPASFTFLESAMILAMVVLGGMGSTLGVVLGALVLILLPEYLRAFSEYRMLIFGAAMVLMMVFRPQGLVSCRSREYDVNDPE…	sp|P30296|LIVM_SALTY	50.746	High-affinity branched-chain amino acid transport system permease protein LivM OS=Salmonella typhimurium (strain LT2 / SGSC1412 / ATCC 700720) OX=99287 GN=livM PE=3 SV=1	No		K01998	livM; branched-chain amino acid transport system permease protein	No		GCF_000195755.1:WP_010937855.1	high-affinity branched-chain amino acid ABC transporter permease LivM [Desulfovibrio]	No
Dyella79	Gammaproteobacteria	Dyella japonica UNC79MFTsu3.2	N515DRAFT_2015	N515DRAFT_2015	enzyme	Branched-chain amino acid aminotransferase (EC 2.6.1.42)	MAQQYPEWIWQNGQIKPWREATTHVMSHALHYGSSVFEGIRSYATPDGAAIFRLTDHLKRLYQSAKIYDMVLPYSQDQIAAACRDVIKQNGLGAAYLRPVAYRGLGGFGLSAETPIDVAVAAWPMGPYLGPEALESGIDACVSSWQRFAPNTIPAGAKAGGNYLSGQLIAREARRLGFGEGIALANTGLLSEGAGENLFLVFDGVLHTTPASASILTGITRHTLITLAREDGIEVIERDIPREYLYLCDELLMCGTAAEITPIRSVDGKKIGSGKAGRVTRRMQELFFGLFNGKTNDQWGWLEPV	sp|P0AB81|ILVE_ECOL6	57.003	Branched-chain-amino-acid aminotransferase OS=Escherichia coli O6:H1 (strain CFT073 / ATCC 700928 / UPEC) OX=199310 GN=ilvE PE=3 SV=2	Yes		K00826	E2.6.1.42, ilvE; branched-chain amino acid aminotransferase [EC:2.6.1.42]	Yes		GCF_000620485.1:WP_026633763.1	branched-chain amino acid transaminase [Dyella]	Yes
Dyella79	Gammaproteobacteria	Dyella japonica UNC79MFTsu3.2	N515DRAFT_3391	N515DRAFT_3391	enzyme	Alpha-amylase (EC 3.2.1.1)	MPPFRALSRLTVAFALALGATVAYAADSTPPVATSTAPKTQGSGVWYEIFVRAWYDTNGDGIGDLNGVTAKLDYLQSLGVSGIWLMPINPSPTYHGYDVTDYEGINPQYGSMADFEKLVSEAHKRGIEVIIDLVINHSSDQHPWFKSALDPHSQYRHWYTWAGKDTDLKAISAVDGPAWHANGKQHYLGDFTGAMPDLNYDEPAVRREMIAIGKFWLSKGADGFRLDAARHIYDDLKSDNGQPAVIRKNAQWWSEFRQGLRQVRPDVYLVGEVSARQPGELAPYLPALGSVFDFPLAEQLIASAKQEQAGKLPALLTESYAAFHAAAGDDYADAPFLSNHDQERVLSQLGGDLHHMRTAAAMLLTLPGRPYIYYGEEIGMLGRKPDENLREPMRWQRTP…	sp|P20845|AMY_PRIMG	45.49	Alpha-amylase OS=Priestia megaterium OX=1404 PE=1 SV=1	Yes		K01176	AMY, amyA, malS; alpha-amylase [EC:3.2.1.1]	Yes		GCF_000620485.1:WP_051548592.1	alpha-amylase family glycosyl hydrolase [Dyella]	Vague		EC:3.2.1.70	Low	No	exo-1,6-alpha-glucosidase, would not work on cyclodextrin I think
HerbieS	Betaproteobacteria	Herbaspirillum seropedicae SmR1	HSERO_RS04870	HSERO_RS04870	transporter	glycerol transporter SBP	MMQNMRKIKLTVLAAAMVMAGVAGNAWADIKAAEKWVDSEFQPSTLSRPQQVSEMQWFIDAAAKLKAKGVKEIHVVSETLDTHAYESKTLAKAFEEITGIKVIHDVIQEGDVVEKMQTSLQSGKSIYDGWVNDSDLIGTHYRNGQTVVLTDYMAGPGKEYTNPGLDLKDFIGTSFTTAPDGKLYQLPDQQFANLYWFRADWFARKDLQEKFKAKYGYELGVPQNWSAYEDIAAFFTNDVKELDGKKIYGHMDYGKKDPSLGWRFTDAWLSMAGAADKGLPNGLPVDEWGIRVADDKCTPVGASVARGGATNSPAAVYALTKYLDWMKKYAPPEALGMTFSEAGPVPAQGHIAQQIFWYSAFTASMTKQGLPVVNADGSPKWRMAPGPHGPYWKDGMQNG…		NA				K17321	glpV; glycerol transport system substrate-binding protein	Yes		GCF_000143225.1:WP_013233003.1	ABC transporter substrate-binding protein [Herbaspirillum]	Vague
HerbieS	Betaproteobacteria	Herbaspirillum seropedicae SmR1	HSERO_RS05205	HSERO_RS05205	enzyme	L-arabonate dehydratase (EC 4.2.1.25)	MSSDKKDKSRTLRSAGWFGTADKNGFMYRSWMKNQGIPDHEFQGKPVIGICNTWSELTPCNAHFRKIAEHVRRGIIEAGGFPVEFPVFSNGESNLRPTAMLTRNLASMDVEESIRGNPIDAVVLLTGCDKTTPALLMGAASCDVPAIVVTGGPMLNGKHQGRDIGSGTVVWQLSEQVKAGEITIHDFMAAEAGMSRSAGTCNTMGTASTMACMAESLGVSLPHNAAIPAVDARRYVLAHLSGMRIVDMVWEGLTLSKILTRKAFENAIRTNAAIGGSTNAVIHLKAIAGRIGVDLELEDWTRIGRGTPTIVDLQPSGRYLMEEFYYAGGLPAVLRRLGEADLLPHKDALTVNGQTMWDNVKDAPIYNDEVVRPLAKPLIEDGGICILRGNLAPRGAVLK…	sp|Q1JUQ1|ARADA_AZOBR	79.688	L-arabonate dehydratase OS=Azospirillum brasilense OX=192 GN=araC PE=1 SV=1	Yes		K13875	araC; L-arabonate dehydrase [EC:4.2.1.25]	Yes		GCF_000143225.1:WP_013233070.1	dihydroxy-acid dehydratase [Herbaspirillum seropedicae]	No	Dihdyroxy-acid dehydratase would probably mean the enzyme of branched-chain a.a. synthesis (usually named ilvD); L-arabonate dehydratase is specific for the C2/C3 isomers (PMID: 16950779) and probably wouldn’t act on (R)-2,3-dihydroxy-3-methylpentanoate (3-OH has the opposite chirality), the intermediate in isoleucine synthesis	EC:4.2.1.25	High	Yes
HerbieS	Betaproteobacteria	Herbaspirillum seropedicae SmR1	HSERO_RS05250	HSERO_RS05250	transporter	ABC transporter for L-fucose, ATPase component	MQEDKETSTTGVAASSSSSVPVIALRNVCKRFPGVLALDNCQFELAAGEVHALMGENGAGKSTLMKILSGVYQRDSGDILLDGKPVEITEPRQAQALGIGIIHQELNLMNHLSAAQNIFIGREPRKAMGLFIDEDELNRQAAAIFARMRLDMDPSTPVGELTVARQQMVEIAKALSFDSRVLIMDEPTAALNNAEIAELFRIIRDLQAQGVGIVYISHKMDELRQIADRVSVMRDGKYIATVPMQETSMDTIISMMVGRALDGEQRIPPDTSRNDVVLEVRGLNRGRAIRDVSFTLRKGEILGFAGLMGAGRTEVARAIFGADPLEAGEIIIHGGKAVIKSPADAVAHGIGYLSEDRKHFGLAVGMDVQANIALSSMGRFTRVGFMDQRAIREAAQMYV…	sp|A0B297|RGMG2_BURCH	80.868	Putative ribose/galactose/methyl galactoside import ATP-binding protein 2 OS=Burkholderia cenocepacia (strain HI2424) OX=331272 GN=Bcen2424_5039 PE=3 SV=1	No		K10441	rbsA; ribose transport system ATP-binding protein [EC:7.5.2.7]	No		GCF_000143225.1:WP_013233079.1	sugar ABC transporter ATP-binding protein [Herbaspirillum seropedicae]	Vague
HerbieS	Betaproteobacteria	Herbaspirillum seropedicae SmR1	HSERO_RS11490	HSERO_RS11490	transporter	D-ribose ABC transporter, permease component RbsC	MQTSSSTPAASRQAAYLAGFKNYLGLMAALLAMCVMFAFLSENFLSAATFITLSNDIPPLVVMSVGMTFILIIGGIDLSVGSVMALAASMLSMAMVRWGWPLYAAAPLGVVVAALCGTLTGMVSVHWRIPSFIVSLGVLEIARGLAYQVTNSRTEYIGSAVDVISSPILFGMSPAFLSAIAIVIIAQLVLTRTVLGRYWIGIGTNEEAVRLSGVNPNPSKILAFALMGALAGIAALFQVSRLEAADPNGGVGMELQVIAAVVIGGTSLMGGRGSIVSTFIGVLIISVLEAGLAQVGVSEPMKRIITGAVIVVAVILDTYRRRGQRHAR	sp|P44736|RBSC_HAEIN	35.616	Ribose import permease protein RbsC OS=Haemophilus influenzae (strain ATCC 51907 / DSM 11121 / KW20 / Rd) OX=71421 GN=rbsC PE=3 SV=1	Yes		K10440	rbsC; ribose transport system permease protein	Yes		GCF_000143225.1:WP_013234273.1	ABC transporter permease [Herbaspirillum seropedicae]	Vague
HerbieS	Betaproteobacteria	Herbaspirillum seropedicae SmR1	HSERO_RS17015	HSERO_RS17015	enzyme	sorbitol dehydrogenase (EC 1.1.1.14); xylitol dehydrogenase (EC 1.1.1.9)	MQALVLEATRELKLREIDLPQQMGAQDVRIRIHTVGICGSDLHYYTHGSIGPFKVEAPMVLGHEASGTVIEVGSAVSHLKVGDRVCMEPGIPRLDSPATLRGMYNLDPAVRFWATPPIHGCLTGSVVHPAAFTYRLPDNVSFAEGAIVEPLSIGLQAATKARMKPGDTAVVIGAGTIGAMTALAALAGGAARVILADVVAEKLAHFADNPAVITVDVTRETLTDVVRQATDGWGADVVFEASGHAGVYQTLLDLVCPGGCAVLVGMPPAPVALDVVAMQTKEVRLESVFRYANIFPRALALISSGMIDVKPFISRKFPFSQSIRAFEEAASGRPQDVKIQIEMEG	sp|Q98D10|XYLD_RHILO	60.58	Putative D-xylulose reductase OS=Mesorhizobium japonicum (strain LMG 29417 / CECT 9101 / MAFF 303099) OX=266835 GN=mlr4915 PE=3 SV=1	Close	Activity on sorbitol is not mentioned for xylD; HSERO_RS17015 seems to be the sole dehydrogenase for sorbitol utilization	K05351	E1.1.1.9; D-xylulose reductase [EC:1.1.1.9]	Close		GCF_000143225.1:WP_013235341.1	NAD(P)-dependent alcohol dehydrogenase [Herbaspirillum seropedicae]	Vague
HerbieS	Betaproteobacteria	Herbaspirillum seropedicae SmR1	HSERO_RS20590	HSERO_RS20590	enzyme	fused 3-oxo-5,6-dehydrosuberyl-CoA semialdehyde dehydrogenase and oxepin-CoA hydrolase (EC 3.3.2.12; EC 1.2.1.91; EC 4.2.1.55)	MTAHPPLLQSFIAGRWLGQRPSQALHSAVNGSAVASTHEESIDFGEALEHARKTGLPALMALDFQQRAAILKALAKYLMEHKEVLYAVSAHTGATRADSWIDIEGGSGTLFTYASIGANEFPSSNLVHEGPAMRLGKQGRFAGTHILVPRGGVAVHINAFNFPVWGMLEKFAPTFLAGMPCIVKPATATSYLAEAAVRLIQQSGLLPEGSLQLVIGSTGDLLERLQAQDVVTFTGSADTAAKLRAHPNLIANSIPFNAEADSLNCAILGPDITADDEEFDLFVKEVAREMTTKAGQKCTAIRRAIVPRRHVDAVAERLAARLSKIVVGDPALETVRMGPLASRAQQRDVEERVALLRHSADLILGAGSAFAPQGQGVGEGAFFAPTLLLARDTAAGSPV…	sp|P77455|PAAZ_ECOLI	59.057	Bifunctional protein PaaZ OS=Escherichia coli (strain K12) OX=83333 GN=paaZ PE=1 SV=1	Yes		K02618	paaZ; oxepin-CoA hydrolase / 3-oxo-5,6-dehydrosuberyl-CoA semialdehyde dehydrogenase [EC:3.3.2.12 1.2.1.91]	Yes		GCF_000143225.1:WP_013236050.1	phenylacetic acid degradation bifunctional protein PaaZ [Herbaspirillum seropedicae]	Yes		EC:3.3.2.12 EC:1.2.1.91	High	Yes
HerbieS	Betaproteobacteria	Herbaspirillum seropedicae SmR1	HSERO_RS22235	HSERO_RS22235	enzyme	rhamnulose-1-phosphate aldolase (EC 4.1.2.19) / lactaldehyde dehydrogenase (EC 1.2.1.22)	IASAWDEAYAATLDEPQLLLYRSNLLGADKEITNFGGGNTSAKIAMPDPLTGQTVEVLWVKGSGGDLGSIKLDGFATLYMDKLEALRSRYRGLEHEDEMVGYLPHCTYNLNARAASIDTPLHAYIPRRHVDHMHPDAVIAIAACKNSRDLTARIFEGELGWLPWQRPGYDLGLKLEQLVRAQPHLKGIVLEGHGLFTWGDSARECYENTLNVIRRADAWLAANSRTPAFGGARYQALPKAERAALAARIMPLLRGKISKGEYKLGHFDDSQAVLDFVCSNDLAALAALGTSCPDHFLRTKIRPLVLDFSPQQPDLAALEASLDAALEAYRQDYAAYYQRCARPNSPAMRDPNPVIYLIPGVGMLSFAKDKATARIAGEFYINAVNVMRGANGVDSYVGL…	sp|P40747|YUXG_BACSU	41.474	Uncharacterized oxidoreductase YuxG OS=Bacillus subtilis (strain 168) OX=224308 GN=yuxG PE=3 SV=2	Vague	Closest homolog with a substrate annotated is a different one			Vague		GCF_000143225.1:WP_013236368.1	bifunctional rhamnulose-1-phosphate aldolase/short-chain dehydrogenase [Herbaspirillum seropedicae]	Vague		EC:4.1.2.19	Low	No	missing the second activity
Keio	Gammaproteobacteria	Escherichia coli BW25113	14882	b0757	enzyme	galactokinase	MSLKEKTQSLFANAFGYPATHTIQAPGRVNLIGEHTDYNDGFVLPCAIDYQTVISCAPRDDRKVRVMAADYENQLDEFSLDAPIVAHENYQWANYVRGVVKHLQLRNNSFGGVDMVISGNVPQGAGLSSSASLEVAVGTVLQQLYHLPLDGAQIALNGQEAENQFVGCNCGIMDQLISALGKKDHALLIDCRSLGTKAVSMPKGVAVVIINSNFKRTLVGSEYNTRREQCETGARFFQQPALRDVTIEEFNAVAHELDPIVAKRVRHILTENARTVEAASALEQGDLKRMGELMAESHASMRDDFEITVPQIDTLVEIVKAVIGDKGGVRMTGGGFGGCIVALIPEELVPAVQQAVAEQYEAKTGIKETFYVCKPSQGAGQC	sp|A7ZJD2|GAL1_ECO24	100	Galactokinase OS=Escherichia coli O139:H28 (strain E24377A / ETEC) OX=331111 GN=galK PE=3 SV=1	Yes		K00849	galK; galactokinase [EC:2.7.1.6]	Yes		GCF_000750555.1:WP_000053415.1	galactokinase [Enterobacteriaceae]	Yes		EC:2.7.1.6	High	Yes
Keio	Gammaproteobacteria	Escherichia coli BW25113	15311	b1189	enzyme	D-amino acid dehydrogenase small subunit	MRVVILGSGVVGVASAWYLNQAGHEVTVIDREPGAALETSAANAGQISPGYAAPWAAPGVPLKAIKWMFQRHAPLAVRLDGTQFQLKWMWQMLRNCDTSHYMENKGRMVRLAEYSRDCLKALRAETNIQYEGRQGGTLQLFRTEQQYENATRDIAVLEDAGVPYQLLESSRLAEVEPALAEVAHKLTGGLQLPNDETGDCQLFTQNLARMAEQAGVKFRFNTPVDQLLCDGEQIYGVKCGDEVIKADAYVMAFGSYSTAMLKGIVDIPVYPLKGYSLTIPIAQEDGAPVSTILDETYKIAITRFDNRIRVGGMAEIVGFNTELLQPRRETLEMVVRDLYPRGGHVEQATFWTGLRPMTPDGTPVVGRTRFKNLWLNTGHGTLGWTMACGSGQLLSDLLS…	sp|A7ZZC3|DADA_ECOHS	100	D-amino acid dehydrogenase OS=Escherichia coli O9:H4 (strain HS) OX=331112 GN=dadA PE=3 SV=1	Yes		K00285	dadA; D-amino-acid dehydrogenase [EC:1.4.5.1]	Yes		GCF_000750555.1:WP_001266908.1	D-amino acid dehydrogenase [Enterobacteriaceae]	Yes		EC:1.4.5.1	Low	Yes
Keio	Gammaproteobacteria	Escherichia coli BW25113	15537	b1415	enzyme	Lactaldehyde dehydrogenase	MSVPVQHPMYIDGQFVTWRGDAWIDVVNPATEAVISRIPDGQAEDARKAIDAAERAQPEWEALPAIERASWLRKISAGIRERASEISALIVEEGGKIQQLAEVEVAFTADYIDYMAEWARRYEGEIIQSDRPGENILLFKRALGVTTGILPWNFPFFLIARKMAPALLTGNTIVIKPSEFTPNNAIAFAKIVDEIGLPRGVFNLVLGRGETVGQELAGNPKVAMVSMTGSVSAGEKIMATAAKNITKVCLELGGKAPAIVMDDADLELAVKAIVDSRVINSGQVCNCAERVYVQKGIYDQFVNRLGEAMQAVQFGNPAERNDIAMGPLINAAALERVEQKVARAVEEGARVAFGGKAVEGKGYYYPPTLLLDVRQEMSIMHEETFGPVLPVVAFDTLED…	sp|P25553|ALDA_ECOLI	100	Lactaldehyde dehydrogenase OS=Escherichia coli (strain K12) OX=83333 GN=aldA PE=1 SV=2	Yes		K07248	aldA; lactaldehyde dehydrogenase / glycolaldehyde dehydrogenase [EC:1.2.1.22 1.2.1.21]	Yes	glycolaldehyde is a known substrate	GCF_000750555.1:WP_000115943.1	aldehyde dehydrogenase [Enterobacteriaceae]	Vague		EC:1.2.1.21	High	No	glycolaldehyde dehydrogenase
Keio	Gammaproteobacteria	Escherichia coli BW25113	17057	b2979	enzyme	glycolate dehydrogenase, putative FAD-linked subunit	MSILYEERLDGALPDVDRTSVLMALREHVPGLEILHTDEEIIPYECDGLSAYRTRPLLVVLPKQMEQVTAILAVCHRLRVPVVTRGAGTGLSGGALPLEKGVLLVMARFKEILDINPVGRRARVQPGVRNLAISQAVAPHNLYYAPDPSSQIACSIGGNVAENAGGVHCLKYGLTVHNLLKIEVQTLDGEALTLGSDALDSPGFDLLALFTGSEGMLGVTTEVTVKLLPKPPVARVLLASFDSVEKAGLAVGDIIANGIIPGGLEMMDNLSIRAAEDFIHAGYPVDAEAILLCELDGVESDVQEDCERVNDILLKAGATDVRLAQDEAERVRFWAGRKNAFPAVGRISPDYYCMDGTIPRRALPGVLEGIARLSQQYDLRVANVFHAGDGNMHPLILFD…	sp|P0AEP9|GLCD_ECOLI	100	Glycolate oxidase subunit GlcD OS=Escherichia coli (strain K12) OX=83333 GN=glcD PE=1 SV=1	Yes		K00104	glcD; glycolate dehydrogenase FAD-linked subunit [EC:1.1.99.14]	Yes		GCF_000750555.1:WP_000026117.1	glycolate oxidase subunit GlcD [Enterobacteriaceae]	Yes		EC:1.1.99.14	High	Yes	glycolate dehydrogenase
Keio	Gammaproteobacteria	Escherichia coli BW25113	17589	b3528	transporter	C4 dicarboxylate/orotate:H+ symporter	MKTSLFKSLYFQVLTAIAIGILLGHFYPEIGEQMKPLGDGFVKLIKMIIAPVIFCTVVTGIAGMESMKAVGRTGAVALLYFEIVSTIALIIGLIIVNVVQPGAGMNVDPATLDAKAVAVYADQAKDQGIVAFIMDVIPASVIGAFASGNILQVLLFAVLFGFALHRLGSKGQLIFNVIESFSQVIFGIINMIMRLAPIGAFGAMAFTIGKYGVGTLVQLGQLIICFYITCILFVVLVLGSIAKATGFSIFKFIRYIREELLIVLGTSSSESALPRMLDKMEKLGCRKSVVGLVIPTGYSFNLDGTSIYLTMAAVFIAQATNSQMDIVHQITLLIVLLLSSKGAAGVTGSGFIVLAATLSAVGHLPVAGLALILGIDRFMSEARALTNLVGNGVATIVVA…	sp|Q3YVR0|DCTA_SHISS	100	C4-dicarboxylate transport protein OS=Shigella sonnei (strain Ss046) OX=300269 GN=dctA PE=3 SV=1	Yes		K11103	dctA; aerobic C4-dicarboxylate transport protein	Yes		GCF_000750555.1:WP_000858214.1	C4-dicarboxylate transporter DctC [Enterobacteriaceae]	Yes
Keio	Gammaproteobacteria	Escherichia coli BW25113	17604	b3543	transporter	dipeptide ABC transporter membrane subunit DppB	MLQFILRRLGLVIPTFIGITLLTFAFVHMIPGDPVMIMAGERGISPERHAQLLAELGLDKPMWQQYLHYIWGVMHGDLGISMKSRIPVWEEFVPRFQATLELGVCAMIFATAVGIPVGVLAAVKRGSIFDHTAVGLALTGYSMPIFWWGMMLIMLVSVHWNLTPVSGRVSDMVFLDDSNPLTGFMLIDTAIWGEDGNFIDAVAHMILPAIVLGTIPLAVIVRMTRSSMLEVLGEDYIRTARAKGLTRMRVIIVHALRNAMLPVVTVIGLQVGTLLAGAILTETIFSWPGLGRWLIDALQRRDYPVVQGGVLLVATMIILVNLLVDLLYGVVNPRIRHKK	sp|P0AEF8|DPPB_ECOLI	100	Dipeptide transport system permease protein DppB OS=Escherichia coli (strain K12) OX=83333 GN=dppB PE=1 SV=1	Yes		K12369	dppB; dipeptide transport system permease protein	Yes		GCF_000750555.1:WP_000938855.1	dipeptide ABC transporter permease DppB [Enterobacteriaceae]	Yes
Keio	Gammaproteobacteria	Escherichia coli BW25113	17660	b3599	transporter	Mannitol PTS IIA/IIB/IIC	MSSDIKIKVQSFGRFLSNMVMPNIGAFIAWGIITALFIPTGWLPNETLAKLVGPMITYLLPLLIGYTGGKLVGGERGGVVGAITTMGVIVGADMPMFLGSMIAGPLGGWCIKHFDRWVDGKIKSGFEMLVNNFSAGIIGMILAILAFLGIGPIVEALSKMLAAGVNFMVVHDMLPLASIFVEPAKILFLNNAINHGIFSPLGIQQSHELGKSIFFLIEANPGPGMGVLLAYMFFGRGSAKQSAGGAAIIHFLGGIHEIYFPYVLMNPRLILAVILGGMTGVFTLTILGGGLVSPASPGSILAVLAMTPKGAYFANIAGVCAAMAVSFVVSAILLKTSKVKEEDDIEAATRRMQDMKAESKGASPLSAGDVTNDLSHVRKIIVACDAGMGSSAMGAGVLR…	sp|P00550|PTM3C_ECOLI	100	PTS system mannitol-specific EIICBA component OS=Escherichia coli (strain K12) OX=83333 GN=mtlA PE=1 SV=1	Yes		K02800	mtlA, cmtA; mannitol PTS system EIICBA or EIICB component [EC:2.7.1.197]	Yes		GCF_000750555.1:WP_000093247.1	PTS mannitol transporter subunit IICBA [Enterobacteriaceae]	Yes
Korea	Alphaproteobacteria	Sphingomonas koreensis DSMZ 15582	Ga0059261_1166	Ga0059261_1166	enzyme	Beta-glucosidase (EC 3.2.1.21)	MVPTGKPKLMFRLLSSAMLASLPVVMAATASARDDAAQAHPAMWPERRPTVPLDPAVELRVADLLAKMSLEQKVGQIIQADIASVTPADVHRYHLGSVLNGGNSDPGGRYNAPPRDWLAAADAFYAASMQPNGALPRIPVIWGSDAVHGHNNVVGATLFPHNIGLGAARNPDLIRRIGEATAIEMRVTGLDWTFAPTLAVVRDDRWGRTYEGFGETPEIATAYAAPLIEGLQGKIGDKDWLRGPHIIATAKHFLGDGGTRNGKDQGDTEIGEAGLRDLFSPPYLPALDAGVQSVMVSFSGWNGAKMHGNKSLLTGVVKQRWNFDGFLVGDWNGHGQVAGCTATNCPQSAIAGLDMYMAPDSWKALYEATLGQARDGTLPIDRLDDAVRRILRVKIRAGL…	sp|A7LXU3|BGH3B_BACO1	30.055	Beta-glucosidase BoGH3B OS=Bacteroides ovatus (strain ATCC 8483 / DSM 1896 / JCM 5824 / BCRC 10623 / CCUG 4943 / NCTC 11153) OX=411476 GN=BACOVA_02659 PE=1 SV=1	Yes		K05349	bglX; beta-glucosidase [EC:3.2.1.21]	Yes		GCF_002797435.1:WP_241230614.1	exo 1,3/1,4-beta-D-glucan glucohydrolase [Sphingomonas koreensis]	Yes	the mutant phenotype on cellobiose fits the refseq description	EC:3.2.1.37	Medium	No	xylan 1,4-beta-xylosidase
Korea	Alphaproteobacteria	Sphingomonas koreensis DSMZ 15582	Ga0059261_1647	Ga0059261_1647	transporter	PTS system, N-acetylglucosamine-specific IIBC component	MRKILETLQPLGRALMLPIAVLPVAGLLLRIGQPDLLDIAFVSAAGTAIFGNLGILFAIGVAVGFARDGNGAAALAGVTCYLVSTTGAQTFLIAPPEVVAGLPDAAAKVVAQAWATGQIDRLEVPIGIISGLIGGKFYNRFATIALPEYLAFFGGRRFVPIAAGIAGLLLAGVLGYGYAHISSALDAASHAVVESGGAGMFVYGVLNRLLLVTGLHHLLNNVAWFLVGDFGGATGDLGRFFAGDPNAGAFMSGFFPVMMFGLPAACLAMYHEARPERRKAVGGMLFSLAFTSFLTGVTEPIEFTFMFLAPVLYAIHAVLTGVAMTLMDMLGIKLGFGFSAGLFDYVLNFKLSTRPWMLLPVGAAYAVIYYTLFRFFIRKLDLATPGREKGEAVAAAGET…	sp|O34521|PTWCB_BACSU	46.008	PTS system N-acetylglucosamine-specific EIICB component OS=Bacillus subtilis (strain 168) OX=224308 GN=nagP PE=1 SV=1	Yes		K02804	nagE; N-acetylglucosamine PTS system EIICBA or EIICB component [EC:2.7.1.193]	Yes		GCF_002797435.1:WP_066579739.1	N-acetylglucosamine-specific PTS transporter subunit IIBC [Sphingomonas koreensis]	Yes
Korea	Alphaproteobacteria	Sphingomonas koreensis DSMZ 15582	Ga0059261_1776	Ga0059261_1776	enzyme	Fructokinase (EC 2.7.1.4)	MPLDSFGQAGLMGDEPLLLGAVEAGGTKFLCGIADRTGSVLAQTRIPTTTPAETLDAATAFFAEHVARHGPLSAFSVGSFGPLSLDPIAPDYGSITSTPKPGWQDVDLLGYFRQMIDAPMALDTDVNCAAVGERLFGSGRGLDTFCYVTVGTGIGVGLLVGGAPHGGANHPEAGHIRLPRAPGDHDFAGICPFHGDCLEGLACGPAMKARWGAAAETLPGDHPAWDIEADYLAGLCATLTYIVRPDRIILGGGVMESHLMHARVRRTLVAKLAGYDASMRSLDMDEYVVPPTAGPSAGLTGAFALAYRIVTRQWPMHWAATGSLIAPSITEFANA	sp|P43468|SCRK_PEDPE	43.793	Fructokinase OS=Pediococcus pentosaceus OX=1255 GN=scrK PE=3 SV=1	Yes		K00847	E2.7.1.4, scrK; fructokinase [EC:2.7.1.4]	Yes		GCF_002797435.1:WP_241910306.1	ROK family protein [Sphingomonas koreensis]	Vague
Koxy	Gammaproteobacteria	Klebsiella michiganensis M5al	BWI76_RS00670	BWI76_RS00670	enzyme	Rhamnulose-1-phosphate aldolase (EC 4.1.2.19)	MQTIIDAWFVQGMIKATSDAWLKGWDERNGGNLTLRLDEADIEPYAADFHAKPRYIALSQPMPTLANQPFIVTGSGKFFRNVQLDPAANLGVVKVDSDGAGYHILWGLTNDAVPTSELPAHFLSHSERIKLTNGKDRVIMHCHATNLIALTYVLENSSDLFTRKLWEGSTECLVVFPDGVGILPWMVPGTDEIGQATAEAMQKHSLVLWPFHGVFGSGPNLDETFGLIDTAEKSAEVLVKVYSMGGMKQTITREELIALGKRFNVHPLQSALDLYQ	sp|A6TGA6|RHAD_KLEP7	97.091	Rhamnulose-1-phosphate aldolase OS=Klebsiella pneumoniae subsp. pneumoniae (strain ATCC 700721 / MGH 78578) OX=272620 GN=rhaD PE=3 SV=1	Yes		K01629	rhaD; rhamnulose-1-phosphate aldolase [EC:4.1.2.19]	Yes		GCF_002090195.1:WP_004870621.1	rhamnulose-1-phosphate aldolase [Klebsiella]	Yes
Koxy	Gammaproteobacteria	Klebsiella michiganensis M5al	BWI76_RS00675	BWI76_RS00675	enzyme	L-rhamnose isomerase (EC 5.3.1.14)	MTTQLEQAWEIAKQRYASVGVDVEEALRQLDRLPVSMHCWQGDDVVGFENPEGSLTGGIQATGNYPGKARNASELRADLEQAMSLIPGPKRLNLHALYLESDTPVSRNEIKPEHFKNWVEWAKTNKLGLDFNPSCFSHPLSADGFTLSHANDEIRQFWIDHCKASRRISAYFGEQLGTPSVMNIWIPDGMKDITVDRFAPRQRLLNALDEVISEKLDPAHHIDAVESKLFGIGAESYTVGSNEFYMGYATSRQTALCLDAGHFHPTEVISDKISAAMLYIPRLLLHVSRPVRWDSDHVVLLDDETQAIASEIIRHDLFDRVHIGLDFFDASINRIAAWVIGTRNMKKALLRALLEPTAQLRQLEVDGDYTARLALLEEQKCLPWHAIWEMYCQRHDTPA…	sp|B5XZ52|RHAA_KLEP3	96.181	L-rhamnose isomerase OS=Klebsiella pneumoniae (strain 342) OX=507522 GN=rhaA PE=3 SV=1	Yes		K01813	rhaA; L-rhamnose isomerase [EC:5.3.1.14]	Yes		GCF_002090195.1:WP_004870619.1	L-rhamnose isomerase [Klebsiella]	Yes
Koxy	Gammaproteobacteria	Klebsiella michiganensis M5al	BWI76_RS01295	BWI76_RS01295	enzyme	Uridine phosphorylase (EC 2.4.2.3)	MSKSDVFHLGLTKNDLQGATLAIVPGDPERVEKIAALMDKPVKLASHREFTTWRAELDGKAVIVCSTGIGGPSTSIAVEELAQLGIRTFLRIGTTGAIQPHINVGDVLVTTASVRLDGASLHFAPMEFPAVADFECTTALVEAAKSIGATTHIGVTASSDTFYPGQERYDTFSGRVVSRFKGSMEEWQAMGVMNYEMESATLLTMCASQGLRAGMVAGVIVNRTQQEIPNAETMKQTESHAVKIVVEAARRLL	sp|P0A1F7|UDP_SALTI	97.628	Uridine phosphorylase OS=Salmonella typhi OX=90370 GN=udp PE=3 SV=2	Yes		K00757	udp, UPP; uridine phosphorylase [EC:2.4.2.3]	Yes		GCF_002090195.1:WP_004097583.1	uridine phosphorylase [Klebsiella]	Yes
Koxy	Gammaproteobacteria	Klebsiella michiganensis M5al	BWI76_RS19555	BWI76_RS19555	transporter	Beta-glucoside PTS, IIA/B/C components	MEYKALAQDILTRVGGRENIVSLVHCATRLRFKLKDSKKADAEGLKANPGVIMVVESGGQFQVVIGNHVHDVWLAVRSEAGLTDDSEPVAVKGEKVSLIGQLIDIVSGIFTPFIGVLAASGILKGLLALAVVCGWLTTQQATYKIWFAASDALFFFFPLFLGYTAGKKFGGNPFITMVIGGALTHPLMIQAFDASMAPGAATEYFLGIPVTFINYSSSVIPIILASWVSCWIEKRSNAILPSSMKNFFTPAICLAVVVPLTFLIIGPVATWLSQLLANGYQLIYQVAPWLAGAAMGALWQVCVIFGLHWGLIPLMINNLAVLGHDSMMPMLLPAVMGQVGAALGIFLRTRDARQKVLAGSAVSAGIFGVTEPAIYGLNLPLRRPFIFGCVAGAIGGAMV…	sp|P26207|PTV3B_DICCH	57.188	PTS system beta-glucoside-specific EIIBCA component OS=Dickeya chrysanthemi OX=556 GN=arbF PE=3 SV=1	Yes		K02757	bglF, bglP; beta-glucoside PTS system EIICBA component [EC:2.7.1.-]	Yes		WP_224357475.1	Beta-glucoside PTS, IIA/B/C components	Yes
Koxy	Gammaproteobacteria	Klebsiella michiganensis M5al	BWI76_RS24235	BWI76_RS24235	enzyme	Branched-chain-amino-acid transaminase (EC 2.6.1.42)	MHDRRLAARAGELKPSAVRELLKHSKLPGVISLGGGIPAPELFDTEGLNLAVQQVMNGRFNDAFQYGLTEGYPPLRQAVSELCQARGVACPASHVYITSGSQQSLDIVARTLLDPGDAIVVERPTYLAALQVFQLAQANILSVDTDDDGMLVEQLADLLETTRVKAVYLVPTFGNPGGKTLSEARRRRLVELAKKHDFVIIEDDPYGEISFTDEVRRPLYQYAVELGCEDQVVYTSTFSKILAPGMRIGWIVMPDWLAQQTVIVKQAADLHTNMLSQVITAEYLSMNRLESQIALIREDYRKKCVALADALESQLGEHLEFSRPKGGMFLWARFRYPFDTMEWMKKTLENGVVYVPGEAFYNDNPDTRTLRLSYSTVSADGLMTAVERLAKSL	sp|H3ZPL1|ARAT1_THELN	40.852	Aromatic-amino-acid aminotransferase 1 OS=Thermococcus litoralis (strain ATCC 51850 / DSM 5473 / JCM 8560 / NS-C) OX=523849 GN=OCC_04335 PE=1 SV=1	No	Function: “Shows virtually no activity towards aspartic acid, alanine, valine or isoleucine”	K05825	LYSN; 2-aminoadipate transaminase [EC:2.6.1.-]	No		GCF_002090195.1:WP_004135794.1	PLP-dependent aminotransferase family protein [Klebsiella]	Vague		EC:2.6.1.57	Medium	No	aromatic-amino-acid transaminase
Koxy	Gammaproteobacteria	Klebsiella michiganensis M5al	BWI76_RS26615	BWI76_RS26615	transporter	gluconate:H+ symporter	MPLVIVAIGVALLLLLMIRFKLNGFIALVLVALAVGLMQGMPLDKVIVSIKNGVGGTLGSLALIMGFGAMLGKMLADCGGAQRIATTLIAKFGKQHIQWAVVLTGFTVGFALFYEVGFVLMLPLVFTIAASAGIPLLYIGVPMAAALSVTHGFLPPHPGPTAIATIFHADMGKTLLFGTILAIPTVILAGPVYARFLKGIDKPIPEGLHNPKTFTEEEMPGFGVSVWTSLVPVILMAMRAVAEMVLPKGHAFLPIAEFFGDPVMATLIAVLIAMFTFGLNRGRSMEQINDTLTSSIKIIAMMLLIIGGGGAFKQVLVDSGMDKYIASIMHESNMSPLFMAWSIAAVLRIALGSATVAAITAGGIAAPLIATTGVSPELMVIAVGSGSVIFSHVNDPGFW…	sp|P39835|GNTT_ECOLI	93.151	High-affinity gluconate transporter OS=Escherichia coli (strain K12) OX=83333 GN=gntT PE=1 SV=3	Yes		K06155	gntT; Gnt-I system high-affinity gluconate transporter	Yes		GCF_002090195.1:WP_004134706.1	gluconate transporter [Klebsiella]	Yes
Koxy	Gammaproteobacteria	Klebsiella michiganensis M5al	BWI76_RS26760	BWI76_RS26760	transporter	C4-dicarboxylate transport protein (dctA)	MKISFFKSLYVQVLSAIAIGILLGHFYPELGAQMKPLGDAFVKLIKMIIAPVIFCTVVTGIAGMESMKAVGRTGAVALLYFEIVSTIALIIGLIIVNVVQPGAGMNVDPATLDAKAVAVYAEQAKDQGIVAFLLDIIPGSVIGAFASGNILQVLMFAVLFGFALHRLGSKGQLIFNVIESFSQVIFGIINMIMRLAPIGAFGAMAFTIGKYGVGTLVQLGQLIVCFYITCILFVVVVLGSIAKATGFSIFKFIRYIREELLIVLGTSSSESALPRMLDKMEKLGCRKSVVGLVIPTGYSFNLDGTSIYLTMAAVFIAQATNSHMDIFHQITLLVVLLLSSKGAAGVTGSGFIVLAATISAVGHLPVAGLALILGIDRFMSEARALTNLVGNGVATIVVA…	sp|B5XN31|DCTA_KLEP3	95.794	C4-dicarboxylate transport protein OS=Klebsiella pneumoniae (strain 342) OX=507522 GN=dctA PE=3 SV=1	Yes		K11103	dctA; aerobic C4-dicarboxylate transport protein	Yes		GCF_002090195.1:WP_004126321.1	dicarboxylate/amino acid:cation symporter [Klebsiella]	Yes
Koxy	Gammaproteobacteria	Klebsiella michiganensis M5al	BWI76_RS27185	BWI76_RS27185	transporter	L-lactate/D-lactate permease (some homologs also transport glycolate)	MNLWQQNYDPAGNIWLSSLIASLPILFFFFALIKLKLKGYVAATWTVVIALSVALLFYKMPVDHALASVVYGFFYGLWPIAWIIIAAVFVYKISVKTGQFDIIRSSILSITPDQRLQMLIVGFSFGAFLEGAAGFGAPVAITAALLVGLGFNPLYAAGLCLIVNTAPVAFGAMGIPILVAGQVTGLDSFEIGQMVGRQLPFLTIIVLFWIMAIMDGWRGIKETWPAVMVAGGSFAIAQYLSSNFLGPELPDIISSLVSLVCLTLFLKRWQPVRIFRFGDMGASQVDMNLARTRYTPGQVIRAWSPFLFLTATVTLWSVPPFKALFAPGGAMYDFVINISVPFLDKMVARMPPVVNEATPYAAVYKFDWLSATGTAILFAALLSIVWLRMKPKDAISTFG…	sp|Q8ZL63|LLDP_SALTY	94.918	L-lactate permease OS=Salmonella typhimurium (strain LT2 / SGSC1412 / ATCC 700720) OX=99287 GN=lldP PE=3 SV=1	Yes	Function: “Can also transport D-lactate and glycolate”. But if you just use the description you’d miss this	K00427	lldP, lctP; L-lactate permease	Close		GCF_002090195.1:WP_004137756.1	L-lactate permease [Klebsiella]	Close
Koxy	Gammaproteobacteria	Klebsiella michiganensis M5al	BWI76_RS27785	BWI76_RS27785	transporter	hexose-6-phosphate transporter (important on glucose-6-phosphate); the phenotype on dAMP implies transport of dAMP or deoxyribose-5-phosphate as well	MLAFLNQVRKPTLDLPLEARRKMWFKPFMQSYLVVFIGYLTMYLIRKNFNIAQNDMISTYGLSMTQLGMIGLGFSITYGVGKTLVSYYADGKNTKQFLPFMLILSAICMLGFSASMGAGSTSLFLMIAFYALSGFFQSTGGSCSYSTITKWTPRRKRGTFLGFWNISHNLGGAGAAGVALFGANYLFDGHVIGMFIFPSIIALIVGFIGLRFGSDSPESYGLGNAEELFGEEISEEDKETEENAMTKWQIFVEYVLKNKVIWLLCFSNIFLYVVRIGIDQWSTVYAFQELKLSKEVAIQGFTLFEVGALVGTLLWGWLSDLANGRRALVACVALALIIATLGVYQHASNQYVYLASLFALGFLVFGPQLLIGVAAVGFVPKKAIGAADGIKGTFAYLIG…	sp|P27670|UHPT_SALTY	96.976	Hexose-6-phosphate:phosphate antiporter OS=Salmonella typhimurium (strain LT2 / SGSC1412 / ATCC 700720) OX=99287 GN=uhpT PE=2 SV=2	Yes		K07784	uhpT; MFS transporter, OPA family, hexose phosphate transport protein UhpT	Yes		GCF_002090195.1:WP_004126843.1	hexose-6-phosphate:phosphate antiporter [Klebsiella]	Yes
Marino	Gammaproteobacteria	Marinobacter adhaerens HP15	GFF3085	HP15_3028	transporter	L-lactate uptake protein (The mutant is possibly polar on D-lactate oxidase HP15_3024, but role is confirmed by similarity to Q5SK82)	MSACAGVAIDADKNKANGDVSMNSKNNIRNSCDTGETPPRRSFLKTIAMGATLAGAMLMGAGQAQAATTWKIQSTWDAGTVGYTLFEEWCKSIEAKSGGELKFQCFPAKAVAADNNALFDAVRNGVLQGMNPFTLYWAGKIPASVFLSSYPAGPDQPHQWDTMFYSMGMLEKTREIYKKFGLFYVGPIQHDANIIHSKQPVNSLDDLKGMKIRVPGGMVAEVFQQFGVSTVSLPGSDIFPALEKGTIDAADFVGPAVNYELGFSQVTDYIIFGPPGVMSIYQPVDLMDLTVSLRAWNSISPELQQLVEDEVRIYSQKHYLAIQARNIEAMEKFKADGDTVTRLSQEDLETWRKAAIPIWFNWANKNDDARAILDIQLKYMMNDTVGYITEEDIKGF	sp|Q5SK82|TLBP_THET8	51.261	Lactate-binding periplasmic protein TTHA0766 OS=Thermus thermophilus (strain ATCC 27634 / DSM 579 / HB8) OX=300852 GN=TTHA0766 PE=1 SV=1	Yes				Vague		GCF_000166295.1:WP_041645585.1	TRAP transporter substrate-binding protein DctP [Marinobacter]	Vague
Marino	Gammaproteobacteria	Marinobacter adhaerens HP15	GFF3193	HP15_3135	enzyme	ethanol oxidation regulatory protein ercA	MSHDISSLRKFVSPEIVFGAGSRKSVANFASNFGARHVFLVSDPGVAAAGWVDEIVTLLTDAGIRSTVYTGVSPNPKVDEVMTGAELYKSNECDVIVAIGGGSPMDCAKGIGIVATHGRSILEFEGVDTITNPSPPLILIPTTAGTSADVSQFAIISDPNRRFKFSIISKAVVPDVSLIDPEVTETMDAYLTACTGVDALVHAIEAYVSTGSGPLTDTHALEAIRLINRNLEPLVDNTADPYLREQIMLASMQAGLAFSNAILGAVHAMSHSLGGFLDLPHGLCNALLLEHVVAYNFQSAEDRFRRVAEAMDIDTRGMAKPEIKKRLMNRIVELKRRVGLEARLAQLGVSVSDIPHLSGFALQDPCILTNPRKSSLRDVQVVYEEAL	sp|F8DVL8|ADH2_ZYMMA	41.351	Alcohol dehydrogenase 2 OS=Zymomonas mobilis subsp. mobilis (strain ATCC 10988 / DSM 424 / LMG 404 / NCIMB 8938 / NRRL B-806 / ZM1) OX=555217 GN=adhB PE=3 SV=1	No	ercA does have some dehydrogenase activity but that is not its main role			Vague		GCF_000166295.1:WP_014578345.1	alcohol dehydrogenase-like regulatory protein ErcA [Marinobacter]	Yes		EC:1.1.1.77 EC:1.1.1.1	Low	No	1.1.1.1 is ethanol dehydrogenase, which it does have some activity for, but mostly ercA is regulatory
Marino	Gammaproteobacteria	Marinobacter adhaerens HP15	GFF879	HP15_858	enzyme	phenylalanine aminotransferase (EC 2.6.1.57)	MFEALQPLPQDPILQLMQTFLEDDRPDKVDLGIGVYKDDAGNTPIMAAVHEAERRLLEGETTKSYVGPAGSAGFNSAMAELILGSNSPLVRDGRVSVIQTPGGCGALRMAAEFLRLCKADTKVWVSTPTWANHLPLLGGAGLTIREYPYLNPETLQVDFGAMLETLERADAGDVVLLHGCCHNPSGADLSLAQWQEVTSLIQRKGLLPFVDMAYQGLGEGLDADAAGLRHLASAVPEMLIAASCSKNFGLYRERTGALALVSETATVNAAATSQLLSVIRSHYSMPPAHGASIVETILGDDDLRAQWQQELNGMCKRILHLRHAFADALSPVGDFDFIARQRGMFSFLGISPEQVGRLRKEHGIHMLESSRVNVAGLNDHVLPQVASALREVLGK	sp|P00509|AAT_ECOLI	49.242	Aspartate aminotransferase OS=Escherichia coli (strain K12) OX=83333 GN=aspC PE=1 SV=1	No		K00813	aspC; aspartate aminotransferase [EC:2.6.1.1]	No		GCF_000166295.1:WP_014576347.1	amino acid aminotransferase [Marinobacter adhaerens]	Vague
MR1	Gammaproteobacteria	Shewanella oneidensis MR-1	200295	SO1115	enzyme	dipeptidase	MTALSQLYPQPLWQWFEQICAIPHPSKHEQSLSQHIQAWAKQKQLDVVEDAVGNVIIRKAATPGMEDRKVVVIQAHIDMVPQKNADKVHDFIKDPIEAYVDGDWVKAKGTTLGADNGIGMASALAILGSDDIKHGPLEVLLTIDEEAGMTGAFGLQAGMLNAEILINTDSEQEGEIYMGCAGGVDAQITLPMVWQASEQSYASFSLHLSGLKGGHSGVNIHLGRGNANKILARFLFENADELALELTQFTGGSLRNAIPREANISFMLPAENIDALKEKVHAFEALMRAELAIADPDLRLVLSNIATPKRVMSENSQNTLIDLLHVCPNGVMRMSDEVTGVTETSLNVGVISTNDEEVGILCLIRSLIDSGRSQVEGMLNALTNLAGADVEFSGAYPGW…	sp|P15288|PEPD_ECOLI	60	Cytosol non-specific dipeptidase OS=Escherichia coli (strain K12) OX=83333 GN=pepD PE=1 SV=3	Yes		K01270	pepD; dipeptidase D [EC:3.4.13.-]	Yes		GCF_000146165.2:WP_011071358.1	aminoacyl-histidine dipeptidase [Shewanella oneidensis]	No	May well have the histidine dipeptidase activity, but the mutant phenotype is on Gly-Asp	EC:3.4.13.18	High	Yes
MR1	Gammaproteobacteria	Shewanella oneidensis MR-1	201539	SO2395	enzyme	Acyl-CoA dehydrogenase (EC 1.3.8.7) (but not sure about preferred substrate length)	MNPYQAPLADMRFLLEQVFDAPNTWSQLPDIAEMVDMDTANAILEEAAKISAQLIHPLNRAGDEQGVLHQDNCVITPEGYKAVYDQYSQGGWVGLCGEPEFGGMGMPKMLGVLVDEMAYSACNAFTLYGSLTAGAALCINAHGSEVLKQAYLPKLYSGEWAGAMDMTEPQAGSDLRNIRTRAVPQEDGSYAISGSKIFITGGDHDLTENVIHLVLAKLPESKGISLFLVPKITVNKDGCLGGTNGVSVGSIEHKMGLKGSATCVMNFDEAKGYLIGEPNRGLVCMFTMMNYERLAIGIQGLGSAQAAYQMATDYAKERSQGVAAGGSPTGSDSDPIIVHGDVRRMLLTIRAMTEAGRALSVFTGKQLDLAKYAQDDVKAKAARYVGLLTPVAKAFLTDR…	sp|Q5LLW7|DMDC_RUEPO	44.77	3-methylmercaptopropionyl-CoA dehydrogenase OS=Ruegeria pomeroyi (strain ATCC 700808 / DSM 15171 / DSS-3) OX=246200 GN=dmdC PE=1 SV=1	No		K20035	dmdC; 3-(methylsulfanyl)propanoyl-CoA dehydrogenase [EC:1.3.99.41]	No		GCF_000146165.2:WP_011072374.1	acyl-CoA dehydrogenase family protein [Shewanella oneidensis]	Vague		EC:1.3.8.8	Medium	Yes	long-chain-acyl-CoA dehydrogenase could well be correct
MR1	Gammaproteobacteria	Shewanella oneidensis MR-1	202607	SO3506	enzyme	Glucosamine-6-phosphate deaminase [isomerizing], alternative (EC 3.5.99.6)	MTNTIMEQEARTAPQKIAGQLAANADLMQQLGEKLRAFDPRFVMIVGRGSSDHAGVFAKYLFEIEVGVPTFAAAPSVASVYGKTLKLEGGLVIVISQSGRSPDILAQARMAKNAGAFCVALVNDETAPIKDIVDVVVPLRAGEEKAVAATKSYLATLSAILQLASAWTQSESLAAAVSSLPQALQTAVVAEPQLTPESVENVKNLVVLGRGLGYAVSKEIALKLKEVCSIHAEAFSSAEFLHGPVTLVEKKLTIVDVCIGDESYASHIEQIENVSQRGADLVHLNQTSTDIHPRVAPLALLQRFYIDVAAVAIARGIDPDQPAGLKKVTQTL	sp|Q5JDU3|GLMD_THEKO	26.295	Glucosamine-6-phosphate deaminase OS=Thermococcus kodakarensis (strain ATCC BAA-918 / JCM 12380 / KOD1) OX=69014 GN=glmD PE=1 SV=1	Yes		K00820	glmS, GFPT; glutamine---fructose-6-phosphate transaminase (isomerizing) [EC:2.6.1.16]	Yes		GCF_000146165.2:WP_011073345.1	SIS domain-containing protein [Shewanella oneidensis]	Vague
MR1	Gammaproteobacteria	Shewanella oneidensis MR-1	202865	SO3774	enzyme	proline dehydrogenase/delta-1-pyrroline-5-carboxylate dehydrogenase (gelatin contains a lot of proline)	MFKASEVLAGRYDSANLDELFKAVTDNYIVDEEQYLSELIKLVPSSDEAIERVTRRAHELVNKVRQFEKKGLMVGIDAFLQQYSLETQEGIILMCLAEALLRIPDAATADALIEDKLSGAKWDEHLSKSDSVLVNASTWGLMLTGKIVSLDKKIDGSSSNLLGRLVNRLGEPVIRQAMMAAMKIMGKQFVLGRTMKEALKNSEDKRKLGYTHSYDMLGEAALTRKDAEKYFTDYANAITELGAQSYNESESPRPTISIKLSALHPRYEVANEDRVLTELYDTVIRLIKLARGLNIGISIDAEEVDRLELSLKLFQKLFNSEATKGWGLLGIVVQAYSKRALPVLVWLTRLAKEQGDEIPVRLVKGAYWDSELKWAQQAGEAAYPLYTRKAGTDVSYLAC…	sp|O52485|PUTA_KLEAE	48.317	Bifunctional protein PutA OS=Klebsiella aerogenes OX=548 GN=putA PE=3 SV=1	Yes		K13821	putA; RHH-type transcriptional regulator, proline utilization regulon repressor / proline dehydrogenase / delta 1-pyrroline-5-carboxylate dehydrogenase [EC:1.5.5.2 1.2.1.88]	Yes		GCF_000146165.2:WP_193378418.1	bifunctional proline dehydrogenase/L-glutamate gamma-semialdehyde dehydrogenase PutA [Shewanella oneidensis]	Yes		EC:1.2.1.88	Low	No	Has L-glutamate gamma-semialdehyde dehydrogenase only
Pedo557	Bacteroidetes	Pedobacter sp. GW460-11-11-14-LB5	CA265_RS15435	CA265_RS15435	transporter	glycine transporter	MLHILYIIAITAEAMTAALSAGRRDMDWVGVCIIAWVTALGGGTVRNVLFGHYPMSWVEHPEYLVITAVAALLAAFIASIMTKLKKLFLYLDALGLVVFTIIGCQVAQQIHLPYLIVLFSGMITGCAGGVLRDVLCNEVPFLFRKEIYASAAIVTGAVYIGIEHFHGSEMLATITAAIIGLTLRLLSIRFEWHMPKFVYRDEWH	sp|P45122|Y1240_HAEIN	50.732	UPF0126 membrane protein HI_1240 OS=Haemophilus influenzae (strain ATCC 51907 / DSM 11121 / KW20 / Rd) OX=71421 GN=HI_1240 PE=3 SV=1	Vague				Vague		WP_089912722.1	trimeric intracellular cation channel family protein	Vague
Phaeo	Alphaproteobacteria	Phaeobacter inhibens BS107	GFF712	PGA1_c07270	enzyme	Myo-inosose-2 dehydratase (EC 4.2.1.44)	MTIRIGNAPCSWGVEFAQDPRNPDWRSVLKDCAEAGYKGIELGPVGYMPEDPAILRDALAEYDLELIGGVVFRAFHDPDQWDDVLDGAHRTCKALQAHGAQHLVLIDSISPRRAPTAGRASEAEQMNHAEWSAFRDRLATVAQIGTEEYGLTVGIHAHAAGFMDFEPELERLLNEVDDKILKICFDTGHHSYAGFDPVAFMKRHMDRISYMHFKDIDPKVKADVIAKRTNFYDACGQGIFCNLGEGDVDFPAVRQLLVDTGFSGWCTVEQDCDPTLDPDPVGDARANREYLESIGFN	sp|Q5KYR1|IOLE_GEOKA	29.276	Inosose dehydratase OS=Geobacillus kaustophilus (strain HTA426) OX=235909 GN=iolE PE=3 SV=1	Yes	Terminology is confusing, but same EC number	K03335	iolE; inosose dehydratase [EC:4.2.1.44]	Yes		GCF_003443575.1:WP_014879340.1	TIM barrel protein [Phaeobacter inhibens]	Vague		EC:4.2.1.44	Low	Yes
Phaeo	Alphaproteobacteria	Phaeobacter inhibens BS107	GFF717	PGA1_c07320	transporter	Inositol transport system ATP-binding protein	MSMSQPLIRMQGIEKHFGSVIALAGVSVDVFPGECHCLLGDNGAGKSTFIKTMSGVHKPTKGDILFEGQPLHFADPRDAIAAGIATVHQHLAMIPLMSVSRNFFMGNEPIRKIGPLKLFDHDYANRITMEEMRKMGINLRGPDQAVGTLSGGERQTVAIARAVHFGAKVLILDEPTSALGVRQTANVLATIDKVRKQGVAVVFITHNVRHALAVGDRFTVLNRGKTLGTAQRGDISAEELQDMMAGGQELATLEGSLGGTV	sp|Q9F9B0|FRCA_RHIML	40.8	Fructose import ATP-binding protein FrcA OS=Rhizobium meliloti OX=382 GN=frcA PE=1 SV=1	No	Function: also a high-affinity transporter for ribose and mannose	K02056	ABC.SS.A; simple sugar transport system ATP-binding protein [EC:7.5.2.-]	Vague		GCF_003443575.1:WP_014873821.1	ATP-binding cassette domain-containing protein [Phaeobacter]	Vague
Phaeo	Alphaproteobacteria	Phaeobacter inhibens BS107	GFF2754	PGA1_c27970	transporter	N-Acetyl-D-glucosamine ABC transport system, ATPase component	MTALQLTNVCKSFGPVEVLKDINLTVEDGEFVVFVGPSGCGKSTLLRVISGLEDATAGEISIGGQTVTTTPPAKRGIAMVFQSYALYPHLSVRENMALALKQERQPKEEIAARVAEASRMLSLEDYLDRRPSELSGGQRQRVAIGRAVVREPKLFLFDEPLSNLDAALRMNTRLEIARLHRQLSASMIYVTHDQIEAMTLADKIVVLRDGRIEQVGTPMELYNNPANRFVAEFIGAPAMNFVPAQRLGGNPGQFIGIRPEYARISPVGPLAGEVIHVEKLGGDTNILVDMGEDLTFTARLFGQHDTNVGETLQFDFDPANCLSFDEAGQRI	sp|P54933|SMOK_CERSP	57.143	ATP-binding transport protein SmoK OS=Cereibacter sphaeroides OX=1063 GN=smoK PE=3 SV=2	No	No indication as to substrate in UniProt, but smoK is a polyol transporter (PMC10433430)	K10111	malK, mtlK, thuK; multiple sugar transport system ATP-binding protein [EC:7.5.2.-]	Vague		GCF_003443575.1:WP_014880984.1	ABC transporter ATP-binding protein [Phaeobacter inhibens]	Vague
Phaeo	Alphaproteobacteria	Phaeobacter inhibens BS107	GFF2923	PGA1_c29700	enzyme	D-lactate dehydrogenase, iron-sulfur subunit GlcF (EC 1.1.99.6)	MQTTFSEKQLRDPGTQRANEILRSCVHCGFCTATCPTYQVLGDELDSPRGRIYLIKDMLENERVPDAKTVKHIDRCLSCLACMTTCPSGVHYMHLVDHARAYIDKHYNRPWSDRALRWLLARILPYPGRFRLALIGAKLAQPFKRLVPDARLRAMLDMAPRHIPPVSRNDDPQSFAAKAPRRKRVALMTGCAQKALNTDINDATIRLLTRLGCEVVVAAGAGCCGALTHHMGREEESHATAAKNIRAWTDEIDGQGLDAIVINTSGCGTTVKDYGHMFRNDALAEDAARVSAIAMDISELLMQLDLPEGEDKETTVAYHAACSLQHGQQIKTHPKTLLKRAGFTVVEPADSHLCCGSAGTYNLLQPEISAELKARKVTSLEARQPDLIAAGNIGCMMQI…	sp|P52074|GLCF_ECOLI	42.757	Glycolate oxidase iron-sulfur subunit OS=Escherichia coli (strain K12) OX=83333 GN=glcF PE=1 SV=1	Close	Function: “Is also able to oxidize D-lactate ((R)-lactate) with a similar rate”	K11473	glcF; glycolate dehydrogenase iron-sulfur subunit [EC:1.1.99.14]	No		GCF_003443575.1:WP_014881125.1	glycolate oxidase subunit GlcF [Phaeobacter inhibens]	No		EC:1.1.99.14	High	Close	glycolate dehydrogenase, “also acts on (R)-lactate” = D-lactate
pseudo1_N1B4	Gammaproteobacteria	Pseudomonas fluorescens FW300-N1B4	Pf1N1B4_2262		transporter	Putrescine/lysine transporter component (conserved phenotype on lysine; close homologs are very important for putrescine utilization)	MNLRKFKRRLNRIIPGGRQLVIGVPFIWLFMFFMLPFFIVLKISFAEADVAIPPYTEIYSFIDQKLQVLLNLSNYAMLGDDELYIAAYLGSLKMALISTVLCLLIGYPMAYAIASARKELQTVLVLLIMMPTWTAILIRVYAWMGILSNNGLLNGFLMSMGWIDEPLQILNTNLAVYIGVVYSYLPFMILPLYANLVKHDTSLLEAASDLGSSTFNSFWKITVPLSKNGIIAGCMLVFIPVVGEFVIPELLGGPETLMIGKVLWQEFFNNRDWPVASALAVVMLAILIVPIILFNRSQAKEMEGKE	sp|P31135|POTH_ECOLI	59.732	Putrescine transport system permease protein PotH OS=Escherichia coli (strain K12) OX=83333 GN=potH PE=1 SV=1	Close	No indication that lysine is a substrate	K11075	potH, spuG; putrescine transport system permease protein	Close		GCF_001625455.1:WP_177319477.1	ABC transporter permease subunit [Pseudomonas]	Vague
pseudo1_N1B4	Gammaproteobacteria	Pseudomonas fluorescens FW300-N1B4	Pf1N1B4_2454		enzyme	Serine hydroxymethyltransferase (EC 2.1.2.1)	MFSKQDQIKGYDDALLAAMNAEEQRQEDHIELIASENYTSKRVMEAQGSGLTNKYAEGYPGKRYYGGCEHVDKVEALAIERAKQLFGADYANVQPHSGSSANSAVYLALLQAGDTILGMSLAHGGHLTHGAKVSSSGKLYNAVQYGIDTKTGLIDYDEVERLAVECKPKMIVAGFSAYSKTLDFPRFRQIADKVGALLFVDMAHVAGLVAAGLYPNPLPYADVVTTTTHKTLRGPRGGLILAKANEEIEKKLNAAVFPGAQGGPLMHVIAGKAVCFKEALEPGFKAYQQQVIDNAQAMAGVFIKRGYDVVSGGTDNHLFLVSLIRQGLTGKEADAALGRAHITVNKNAVPNDPQSPFVTSGLRIGTPAVTTRGFKVTQCVELAGWICDILDNLGDADVE…	sp|Q3K5K9|GLYA3_PSEPF	98.561	Serine hydroxymethyltransferase 3 OS=Pseudomonas fluorescens (strain Pf0-1) OX=205922 GN=glyA3 PE=3 SV=1	Yes		K00600	glyA, SHMT; glycine hydroxymethyltransferase [EC:2.1.2.1]	Yes		GCF_001625455.1:WP_008076466.1	serine hydroxymethyltransferase [Pseudomonas]	Yes
pseudo1_N1B4	Gammaproteobacteria	Pseudomonas fluorescens FW300-N1B4	Pf1N1B4_5116		enzyme	Sucrose alpha-glucosidase (EC 3.2.1.48)	MSAALEIAQHALSDGLSRVTDDYRPGYHLAPPAGWMNDPNGVVYFRGEYHVFYQHHPFDAKWGPMYWGHAKSADLVHWQHLPIALAPGDDFDRDGCFSGSAVVCGDTLALIYTGHTWLGEVGDERYIRQVQCLATSTDGIQFVKHGAVIDTAPQDTIMHFRDPKVWQEDDGWYLIAGARLGDVPLLPLYRSTDLHSWEFLDYVSSGSEGDGYMWECPDLFRLNGRDVLLYSPQGMQPEGYERLNKYQTGYRVGRLDSQWHFTGGPFIELDNGHDFYAAQTLLAADGRRLVWAWLDMWESPMPSQAHHWCGMLGVPRELELHADRLCVYPARELTALRMAPLPGVSWWEGSGSRWVPEVNGDMLEIHVHLDLRGCTSGHLGIALRCSDDGHEETLLYYDA…	sp|F8DVG5|SCR_ZYMMA	45.203	Sucrose-6-phosphate hydrolase OS=Zymomonas mobilis subsp. mobilis (strain ATCC 10988 / DSM 424 / LMG 404 / NCIMB 8938 / NRRL B-806 / ZM1) OX=555217 GN=sacA PE=3 SV=1	No		K01193	INV, sacA; beta-fructofuranosidase [EC:3.2.1.26]	Yes	both annotations include sucrose hydrolysis	GCF_001625455.1:WP_081235342.1	glycoside hydrolase family 32 protein [Pseudomonas]	Vague		EC:3.2.1.26	High	Yes	beta-fructofuranosidase
pseudo13_GW456_L13	Gammaproteobacteria	Pseudomonas fluorescens GW456-L13	PfGW456L13_1868		enzyme	Glycine dehydrogenase (aminomethyl-transferring) (EC 1.4.4.2)	MTQINLTTANEFIARHIGPRAGDEQAMLNSLGFDSLEALSASVIPDSIKGTSVLGLEDGLSEADALALIKSIATKNQLFKTFIGQGYYGTHTPSPILRNLLENPAWYTAYTPYQPEISQGRLEALLNFQTLISDLTGLPIANASLLDEATAAAEAMTFCKRLSKNKGSHAFFASVHCHPQTLDVLRTRAEPLGIDVVVGDERELTDVTPFFGALLQYPASNGDVFDYRELTERFHAANALVAVAADLLALTVLTAPGEFGADVAIGSAQRFGVPLGFGGPHAAYFSTKDAFKRDMPGRLVGVSVDRFGNPALRLAMQTREQHIRREKATSNICTAQVLLANIASMYAVYHGPKGLTQIANRVHHLTAILAKGLSALGLSVEQASFFDTLTVKAGAQTAA…	sp|Q3K7X5|GCSP1_PSEPF	95.263	Glycine dehydrogenase (decarboxylating) 1 OS=Pseudomonas fluorescens (strain Pf0-1) OX=205922 GN=gcvP1 PE=3 SV=1	Yes		K00281	GLDC, gcvP; glycine cleavage system P protein (glycine dehydrogenase) [EC:1.4.4.2]	Yes		GCF_001440325.1:WP_057713525.1	aminomethyl-transferring glycine dehydrogenase [Pseudomonas]	Yes
pseudo13_GW456_L13	Gammaproteobacteria	Pseudomonas fluorescens GW456-L13	PfGW456L13_2982		enzyme	3-ketoacyl-CoA thiolase (EC 2.3.1.16)	MTMSNDPIVIVSAVRTPMGGFQGELKSLTAPQLGAAAIKAAVERAGVASDSVDEVLFGCVLPAGLGQAPARQAALGAGLDKSTRCTTLNKMCGSGMEAAILAHDMLLAGSADVVVAGGMESMSNAPYLLDRARAGYRMGHGRVQDSMFLDGLEDAYDKGRLMGTFAEDCAETNGFSREAQDAFAIASTTRAQQAIKDGSFKAEIVPLTVTVGKEQVVISNDEQPPKARLDKIASLKPAFREGGTVTAANSSSISDGAAALVLMRQSQAQKQGLKPLAVIHGHAAFADTPGLFPVAPIGAIKKLMKKTGWSLNDVDLVEVNEAFAVVGMAAMTHLEIPHEKLNVHGGACALGHPIGASGARILVTLLSALRQKGLKRGVAAICIGGGEATAMAVECLY	sp|Q4WCL5|ER10B_ASPFU	51.88	Acetyl-CoA acetyltransferase erg10B, cytosolic OS=Aspergillus fumigatus (strain ATCC MYA-4609 / CBS 101355 / FGSC A1100 / Af293) OX=330879 GN=erg10B PE=1 SV=1	No	2-methylacetoacetyl-CoA is the relevant substrate (isoleucine degradation), not acetoacetyl-CoA (ergosterol biosynthesis)	K00626	ACAT, atoB; acetyl-CoA C-acetyltransferase [EC:2.3.1.9]	No		GCF_001440325.1:WP_057714715.1	acetyl-CoA C-acyltransferase [Pseudomonas]	Yes		EC:2.3.1.9	High	Close	2.3.1.9 prefers acetoacetyl-COA, but it’s basically the same
pseudo13_GW456_L13	Gammaproteobacteria	Pseudomonas fluorescens GW456-L13	PfGW456L13_2985		transporter	isobutyryl-CoA dehydrogenase (EC 1.3.8.5) (modest phenotype, but conserved, and some homologs have a much stronger phenotype)	MHDIELSEEQVMIRDMARDFARGEIAPHAQAWEKAGWIDDGLVAKMGELGLLGMVVPEEWGGTYVDYVAYALAVEEISAGDGATGAFMSIHNSVGCGPVLNYGSEEQKQTWLADLASGQVIGCFCLTEPQAGSEAHNLRTRAELRDGQWVINGAKQFVSNGKRAKLAIVFAVTDPDLGKRGISAFLVPTDTAGFIVDRTEHKMGIRASDTCAVTLNNCTIPEANLLGERGKGLAIALSNLEGGRIGIAAQALGIARAAFEAALAYSRDRVQFGKAINEHQSIANLLADMHMQLNAARLMILHAARLRTAGKPCLSEASQAKLFASEMAEKVCSSAIQIHGGYGYLEDYPVEKYYRDARITQIYEGSSEIQRMVIARELKNYLI	sp|P45857|ACDB_BACSU	50.667	Acyl-CoA dehydrogenase OS=Bacillus subtilis (strain 168) OX=224308 GN=mmgC PE=1 SV=3	Close	Acyl-CoA is a bit vague			Vague		GCF_001440325.1:WP_057714718.1	acyl-CoA dehydrogenase family protein [Pseudomonas]	Vague
pseudo13_GW456_L13	Gammaproteobacteria	Pseudomonas fluorescens GW456-L13	PfGW456L13_2986		enzyme	3-hydroxyisobutyryl-CoA hydrolase (EC 3.1.2.4)	MDAMQNEVLAEVRNHIGHLTLNRPAGLNALTLDMVRNLHRQLDAWAQDSQVHAVVLRGAGEKAFCAGGDIRSLHDSFKSGDTLHEDFFVEEYALDLAIHHYRKPVLALMDGFVLGGGMGLVQGADLRVVTEKSRLAMPEVGIGYFPDVGGSYFLSRIPGELGIYLGVSGVQIRAADALYCGLADWYLESGKLGVLDEKLDQLEWHDTPLKDLQGLLAKFAVQQLPDAPLATLRPAIDHFFAQPDVPSIVEQLRQVTVADSHEWAVTTADLLETRSPLAMAVTLEMLRRGRELPLEQCFALELHLDRQWFERGDLIEGVRALLIDKDKTPRWNPPTLQALDAEHVASFFSEFDRSES	sp|Q58EB4|HIBCH_DANRE	40.171	3-hydroxyisobutyryl-CoA hydrolase, mitochondrial OS=Danio rerio OX=7955 GN=hibch PE=2 SV=1	Yes				Vague		GCF_001440325.1:WP_057714719.1	enoyl-CoA hydratase/isomerase family protein [Pseudomonas]	Vague		EC:3.1.2.4	Medium	Yes
pseudo13_GW456_L13	Gammaproteobacteria	Pseudomonas fluorescens GW456-L13	PfGW456L13_2740		enzyme	Anthranilate 1,2-dioxygenase (deaminating, decarboxylating) (EC 1.14.12.1)	MNSAKSITQWQEYIQGCLDFRPAEGIYRVARDMFTEPELFDLEMELIFEKNWIYACHESEIANPNDFLTMRAGRQPMIITRDGNNQLHALINACQHRGATLTRVSKGNQSTFTCPFHAWCYKSDGRLVKVKAPGEYPEGFDKATRGLKKARIESYKGFVFISLDVNGSDSLEDYLGDAKVFFDMMVAQSPTGELEILPGKSTYSYDGNWKLQHENGLDGYHVSTVHYNYVSTVQHRQQVNAANGGVSDTLDYSKLGAGDAETDDGWFSFKNGHSLLFSDMPNPTVRAGYATVMPRLIEEYGQQQAEWMMHRLRNLNIYPSLFFMDQISSQLRIVRPVAWNKTEITSQCIGVKGESDADRENRIRQFEDFFNVSGMGTPDDLVEFREAQRGFQARLERWN…	sp|O85673|ANTDA_ACIAD	76.253	Anthranilate 1,2-dioxygenase large subunit OS=Acinetobacter baylyi (strain ATCC 33305 / BD413 / ADP1) OX=62977 GN=antA PE=1 SV=1	Yes		K05599	antA; anthranilate 1,2-dioxygenase (deaminating, decarboxylating) large subunit [EC:1.14.12.1]	Yes		GCF_001440325.1:WP_057714248.1	anthranilate 1,2-dioxygenase large subunit [Pseudomonas]	Yes		EC:1.14.12.1	High	Yes
pseudo13_GW456_L13	Gammaproteobacteria	Pseudomonas fluorescens GW456-L13	PfGW456L13_3320		enzyme	L-arabonate dehydratase (EC 4.2.1.25)	MSDKKPTLRSAQWFGTADKNGFMYRSWMKNQGIADHQFHGKPIIGICNTWSELTPCNAHFRQIAEHVKRGVIEAGGFPVEFPVFSNGESNLRPTAMLTRNLASMDVEEAIRGNPIDGVVLLTGCDKTTPALLMGAASCDVPAIVVTGGPMLNGKHKGKDIGSGTVVWQLSEQVKAGTISIDDFLAAEGGMSRSAGTCNTMGTASTMACMAEALGTSLPHNAAIPAVDARRYVLAHMSGMRAVEMVREDLKLSKILTKEAFENAIRVNAAIGGSTNAVIHLKAIAGRIGVELDLDDWTRIGRGMPTIVDLQPSGRFLMEEFYYAGGLPAVLRRLGEANLIPNPNALTVNGKSIGENTRDAPIYGEDEVIRTLDNPIRADGGICVLRGNLAPLGAVLKPSA…	sp|Q1JUQ1|ARADA_AZOBR	79.966	L-arabonate dehydratase OS=Azospirillum brasilense OX=192 GN=araC PE=1 SV=1	Yes		K13875	araC; L-arabonate dehydrase [EC:4.2.1.25]	Yes		GCF_001440325.1:WP_057715018.1	IlvD/Edd family dehydratase [Pseudomonas]	Vague		EC:4.2.1.25	High	Yes
pseudo13_GW456_L13	Gammaproteobacteria	Pseudomonas fluorescens GW456-L13	PfGW456L13_3503		enzyme	Beta-ureidopropionase (EC 3.5.1.6)	MNAAVDVLQSSHQHINRDRLWQSLMELARLGATVKGGVCRLALTDLDRQARDIFVKWCIDAGCTVSIDAVGNIFARRPGRNPDLPPVMTGSHIDTQPTGGKFDGCFGVLAGVEVLRTLNDLNIETEAPLEVVVWTNEEGSRFAPCMMGSGVFAEKFTLEETLAKVDAEGVTVGQALNAIGYAGPRKVSGHKVGAYFEAHIEQGPILEDERKTIGVVMGALGQKWFDLKLRGVEAHAGPTPMHLRKDALVGAAVIVGALNRAALSHQPHACGTVGCLQAYPGSRNVIPGEVRMTLDFRHLEPARLDSMIAEVREVIETTCDEHGLTFELTPTADFPPLYFDKGCVEAVRGAAQSLGLSHMDIVSGAGHDAIFLAELGPAGMIFVPCEGGISHNEIENAAP…	sp|Q6DTN4|HYUC_RHIML	48.883	N-carbamoyl-L-amino-acid hydrolase OS=Rhizobium meliloti OX=382 GN=hyuC PE=1 SV=1	No	Both substrates have N-carbamoyl, but there’s no adjacent carboxylate group in 3-ureidopropanoate (part of uracil degradation)	K06016	pydC; beta-ureidopropionase / N-carbamoyl-L-amino-acid hydrolase [EC:3.5.1.6 3.5.1.87]	Yes	Beta-ureidopropionases often have the second activity as well, so it’s quite possibly correct	GCF_001440325.1:WP_057715181.1	Zn-dependent hydrolase [Pseudomonas]	Vague		EC:3.5.1.87	Medium	No	N-carbamoyl-L-amino-acid hydrolase
pseudo13_GW456_L13	Gammaproteobacteria	Pseudomonas fluorescens GW456-L13	PfGW456L13_3505		transporter	uridine/cytosine permease	MQQIRSQVTERDGLFELEAGSDVLDSPRYNHDIAPTKVRERTWNKWHITALWVGMAICVPTYTLGGVLTAYFGLTVGEALLAILFANIIVLIPLTLNAFPGTKYGIPFPVLLRSSFGVLGSNIPCLIRALVACGWFGIQTMFGGLAIHLFLGSVFEGWKSLGGTGEVIGFMVFWALNLWVVIRGAESIKWLETLSAPLLVLVGVGLLVWAMPNVSMTELLAIPAKRPEGAGVASYFAAGLTAMVGFWATLSLNIPDFSRYAKSQKDQIVGQIIGLPLTMFLFASLGVVMTAASVKLVGVTVSDPVTLIGHIQSPVWVALAMALIIIATLSTNTAANIVSPTNDFQNIAPKAINRTKAVILTGLVGLALMAHELLKKLGLIVSDLSLETVYSNWLLGYSS…	sp|P94575|ALLP_BACSU	35.417	Allantoin permease OS=Bacillus subtilis (strain 168) OX=224308 GN=pucI PE=2 SV=1	Close	Function mentions some activity on “ range of nucleobases and nucleosides”	K03457	TC.NCS1; nucleobase:cation symporter-1, NCS1 family	Vague	nucleobase is a bit vague, and, uridine is not one	GCF_001440325.1:WP_057715182.1	NCS1 family nucleobase:cation symporter-1 [Pseudomonas]	Vague	Vague nucleobase is a bit vague, and, uridine is not one
pseudo13_GW456_L13	Gammaproteobacteria	Pseudomonas fluorescens GW456-L13	PfGW456L13_161		transporter	putative transporter, required for glycine utilization	MLLMLYLIAITTEAMTGALSAGRRGMDWFGVVLIACVTALGGGSVRDVLLGHYPLTWVKHPEYLVLTTAAAMITVFTARWMRHLRSLFLVLDAMGLVAFTLIGCITALEMGHGMLVASVSGVITGVFGGILRDIFCNDIPLIFRRELYASVSFAAAWCYMLCIYLQLPDEQSILITLFGGFLLRLLAIRFHWEMPKFVYNDEA	sp|P45122|Y1240_HAEIN	54.634	UPF0126 membrane protein HI_1240 OS=Haemophilus influenzae (strain ATCC 51907 / DSM 11121 / KW20 / Rd) OX=71421 GN=HI_1240 PE=3 SV=1	Vague				Vague		GCF_001440325.1:WP_057712247.1	trimeric intracellular cation channel family protein [Pseudomonas]	Vague
pseudo13_GW456_L13	Gammaproteobacteria	Pseudomonas fluorescens GW456-L13	PfGW456L13_805		enzyme	gamma-glutamyl-gamma-aminobutyraldehyde dehydrogenase (EC 1.2.1.99); 4-guanidinobutyraldehyde dehydrogenase (EC 1.2.1.54)	MTTLTRADWEQRARDLKIEGRAYINGEYTDAVSGETFECISPVDGRLLGKIASCDAADAQRAVENARATFNSGVWSRLAPTKRKSTMIRFAGLLKQHAEELALLETLDMGKPISDSLYIDVPGAAQALSWSGEAIDKIYDEVAATPHDQLGLVTREPVGVVGAIVPWNFPLMMACWKLGPALSTGNSVILKPSEKSPLTAIRIAELAVEAGIPKGVLNVLPGYGHTVGKALALHNDVDTLVFTGSTKIAKQLLIYSGESNMKRVWLEAGGKSPNIVFADAPNLQDAAEAAAGAIAFNQGEVCTAGSRLLVERSIKDKFLPLVIEALKAWKPGNPLDPATNVGALVDTQQMNTVLSYIESGHADGARLVAGGKRTLQETGGTYVEPTIFDGVSNAMKIAQ…	sp|P23883|PUUC_ECOLI	57.841	NADP/NAD-dependent aldehyde dehydrogenase PuuC OS=Escherichia coli (strain K12) OX=83333 GN=puuC PE=1 SV=2	Close	Function: Also involved in the breakdown of putrescine through the oxidation of gamma-Glu-gamma-aminobutyraldehyde to gamma-Glu-gamma-aminobutyrate (gamma-Glu-GABA) (but you have to read pretty far down)	K12254	kauB; 4-guanidinobutyraldehyde dehydrogenase / NAD-dependent aldehyde dehydrogenase [EC:1.2.1.54 1.2.1.-]	Close		GCF_001440325.1:WP_057712751.1	aldehyde dehydrogenase [Pseudomonas]	Vague
pseudo13_GW456_L13	Gammaproteobacteria	Pseudomonas fluorescens GW456-L13	PfGW456L13_1869		enzyme	glycine cleavage system H protein	MSELRFTEDHEWLRTEADGSVTVGITAFAQNALGDVVFVQLPELQSYDKGAEAATVESVKAASGVYMPLDGEVLEVNPALDSSPELVNEDPLGEGWFFRFKPSDAAAVGQLLDQDAYDRLIKAQAEA	sp|Q88P64|GCSH1_PSEPK	82.677	Glycine cleavage system H protein 1 OS=Pseudomonas putida (strain ATCC 47054 / DSM 6125 / CFBP 8728 / NCIMB 11950 / KT2440) OX=160488 GN=gcvH1 PE=3 SV=1	Yes		K02437	gcvH, GCSH; glycine cleavage system H protein	Yes		GCF_001440325.1:WP_007996035.1	glycine cleavage system protein GcvH [Pseudomonas]	Yes		EC:2.3.1.12	Low	No	2.3.1.12 is part of pyruvate dehydrogenase not glycine cleavage
pseudo13_GW456_L13	Gammaproteobacteria	Pseudomonas fluorescens GW456-L13	PfGW456L13_1977		enzyme	Succinylglutamate desuccinylase (EC 3.5.1.96)	MLALGKLLELTLAGREPAEKTQLTVEGVRMRWLSEGALEVRPPEARDNGLDLLLSAGIHGNETAPIELLDRLLHDIARGDLKPRARILFLFGNPEAIRKGERFVEQDVNRLFNGRHEQSSGCEALRACELERLAASFFSLPDRQRLHYDLHTAIRGSKIEQFALYPWKEDRQHSRQELARLRAAGMEAVLLQNKPSIVFSSYTYDKLGAEAFTLELGKARPFGQNDGVNVSLLEKRLKQIIEGTEPELTEDALDGLQLYSVAREIIKHSDSFRLNLPADIENFSELEVGYLLAEDIANTRWIIEEEGARIIFPNPRVKNGLRAGILVVPTTDENLA	sp|Q3K888|ASTE_PSEPF	94.643	Succinylglutamate desuccinylase OS=Pseudomonas fluorescens (strain Pf0-1) OX=205922 GN=astE PE=3 SV=1	Yes		K05526	astE; succinylglutamate desuccinylase [EC:3.5.1.96]	Yes		GCF_001440325.1:WP_057713614.1	succinylglutamate desuccinylase [Pseudomonas]	Yes		EC:3.5.1.96	High	Yes
pseudo13_GW456_L13	Gammaproteobacteria	Pseudomonas fluorescens GW456-L13	PfGW456L13_2016		transporter	C4-dicarboxylate transporter	MTTRQPLYKSLYFQVIVAIAIGILLGHFYPQTGVALKPLGDGFIKLIKMVIAPIIFCTVVSGIAGMQNMKSVGKTGGYALLYFEIVSTLALLIGLVVVNVVQPGAGMHIDVSTLDTSKIAGFISAGKDQSIIAFVLNVIPNTIVGAFANGDILQVLMFSVIFGFALHRLGAYGKPVLDFIDRFAHVMFNIINMIMKLAPVGAFGAMAFTIGAYGVGSLVQLGQLMICFYITCILFVLLVLGAICRAHGFSVIKLIRYIREELLIVLGTSSSESALPRMLIKLERLGAQKSVVGLVIPTGYSFNLDGTSIYLTMAAVFIAQATDTPMDLTAQITLLLVLLLSSKGAAGVTGSGFIVLAATLSAVGHLPVAGLALILGIDRFMSEARALTNLVGNAVATLV…	sp|Q848I3|DCTA_PSECL	93.243	C4-dicarboxylate transport protein OS=Pseudomonas chlororaphis OX=333 GN=dctA PE=3 SV=1	Yes		K11103	dctA; aerobic C4-dicarboxylate transport protein	Yes		GCF_001440325.1:WP_057713642.1	dicarboxylate/amino acid:cation symporter [Pseudomonas]	Yes
pseudo13_GW456_L13	Gammaproteobacteria	Pseudomonas fluorescens GW456-L13	PfGW456L13_740		enzyme	L-asparaginase (EC 3.5.1.1)	MNSSTYPAAQHVMVLYTGGTIGMQASANGLAPASGFEARMRDYLHSQPELVVPQWRFREMSPLIDSANMTPTYWQQLREAVVDAVDVQGCDSVLILHGTDTLAYSAAAMSFQLLGLHARVCFTGSMLPAGVTDSDAWENLGGALVAMGQGLAPGVHLYFHGELLDPTRCAKVRSFGRHPFKRLVRQGGGVKAASIPAQLNYNQPKQLAKVAVLPLFPGISAEVLDGLLDSGIQGLVLECYGSGTGPSDNPEFLASLGRARDNGVVVVAVTQCHEGGVKLDVYEAGSRLRGVGVLSGGGMTREAAFGKLHGLLGAGLEAAEVRRLVELDLCGELS	sp|P0A963|ASPG1_ECO57	35.821	L-asparaginase 1 OS=Escherichia coli O157:H7 OX=83334 GN=ansA PE=3 SV=1	Yes		K01424	E3.5.1.1, ansA, ansB; L-asparaginase [EC:3.5.1.1]	Yes		GCF_001440325.1:WP_057712712.1	asparaginase [Pseudomonas]	Yes		EC:3.5.1.1	High	Yes
pseudo13_GW456_L13	Gammaproteobacteria	Pseudomonas fluorescens GW456-L13	PfGW456L13_3649		transporter	D-serine permease	MHSGPTLLVVLFSAIILIVFLIVKVRVHAFLALTAASFVVGIGSGMPLAQMASSYEKGVGGTLGFLATIIGLGGILGKMLEESGGAERIAQTLLSTLGKERASWAMMLVGFIAGIPVFFEVGFVLLIPLIYVVAKETRINLLYLGVPLAVSLMAVHCMLPPHPAAMAITGLLGADVGKVIVYGLIIALPTAIIAGPLWIKLVCKSEAPDTQEAFLDEHCVDSATRDLPGLGLTLLTILLPLLLMVGKSFAAGLPHDSGLFSIVSFLGTPLIALSIAVVFAYWALGLRRGLSMPDLLAHTQKSFPPLASILLIIGAGGAFNGILVDSGVGNALSGSLTQLNMNPIVLAWLVAGLMHFAVGSATVAMISAAGMVMPMLSAHPTVSKEIICIAIGAGAIGWT…	sp|P08555|DSDX_ECOLI	51.22	D-serine transporter DsdX OS=Escherichia coli (strain K12) OX=83333 GN=dsdX PE=1 SV=2	Yes		K13629	dsdX; D-serine transporter	Yes		GCF_001440325.1:WP_057715308.1	gluconate:H+ symporter [Pseudomonas]	No
pseudo13_GW456_L13	Gammaproteobacteria	Pseudomonas fluorescens GW456-L13	PfGW456L13_4527		transporter	tricarboxylate transporter component TctB	MLLQRIFASVLLLACLSLVAMAWPYQAPFSYEPIGPRAFPLLMLGLMGLALVYMVYRPSPIKHTDEEPPLDRETLTKIGVCVLLLLVFAGLFEPLGFILSSMLVGIPMARLYGGRWLPGAIIISLMSVGLYLLFDKVMDVPLPLGLLDVLEN		NA				K07794	tctB; putative tricarboxylic transport membrane protein	Yes		GCF_001440325.1:WP_057716032.1	tripartite tricarboxylate transporter TctB family protein [Pseudomonas]	Yes
pseudo13_GW456_L13	Gammaproteobacteria	Pseudomonas fluorescens GW456-L13	PfGW456L13_4770		transporter	ABC transporter for L-Asparagine and possibly other L-amino acids, periplasmic substrate-binding component	MRIVPHILGAAIAAALISTPVFAAELTGTLKKIKESGTITLGHRDASIPFSYIADASGKPVGYSHDIQLKVVEALKKDLDMPNLQVKYNLVTSQTRIPLVQNGTVDLECGSTTNNVERQQQVDFSVGIFEIGTRLLSKADSKYKDFPDLAGKNVVTTAGTTSERILKAMNADKQMGMNVISAKDHGESFQMLETGRAVAFMMDDALLAGEAAKAKKASDWAVTGTPQSYEIYGCMVRKGDEPFKKAVDDAIKATYASGEINKIYEKWFMQPIPPKGLNLNFPMSDELKALIAKPTDKAADDKKS	sp|Q9I402|GASBP_PSEAE	79.667	L-glutamate/L-aspartate-binding protein OS=Pseudomonas aeruginosa (strain ATCC 15692 / DSM 22644 / CIP 104116 / JCM 14847 / LMG 12228 / 1C / PRS 101 / PAO1) OX=208964 GN=PA1342 PE=1 SV=1	No	Note that the main asparaginase is expected to be cytoplasmic (PfGW456L13_740) so aspartate is not the substrate during growth on asn	K10001	gltI, aatJ; glutamate/aspartate transport system substrate-binding protein	No		GCF_001440325.1:WP_046041277.1	glutamate/aspartate ABC transporter substrate-binding protein [Pseudomonas]	No
pseudo13_GW456_L13	Gammaproteobacteria	Pseudomonas fluorescens GW456-L13	PfGW456L13_3038		enzyme	mannitol 2-dehydrogenase (mannose is apparently converted to fructose via mannitol); very simlar to O08355	MKLNQLNLNRLAPEVVLPAYALGETRQGIAHIGVGGFHRAHQAYYTDALMNTGEGLDWAICGVGLRAEDRRARDDLKDQDYLFTLFELGDSGDTEVRVIGALRDMLLAEDSAQALIDKLASPEIRIVSLTITEGGYCIDDSTGEFMAHLPQIQHDLAHPGAPKTVFGFLCAALAKRRAAGTAAFTLMSCDNLPHNGAVTRKALLAFAALHDSQLRDWIDTNVSFPNAMVDRITPMTSTLHRLQLADRHGVDDAWPVVCEPFAQWVLEDRFVNGRPAWEKVGVQFTDDVTPYEEMKIKLLNGSHLALTYLGFLKGYRFVHEAMNDPLFVRYMRAYMDLDVTPQLPAVPGIDLAEYKNTLVARFSNQAIADQLERVCSDGSSKFPKFTVPTINRLIADGCD…	sp|Q0UEB6|M2DH_PHANO	44.877	Mannitol 2-dehydrogenase OS=Phaeosphaeria nodorum (strain SN15 / ATCC MYA-4574 / FGSC 10173) OX=321614 GN=SNOG_09898 PE=3 SV=1	Yes		K00045	E1.1.1.67, mtlK; mannitol 2-dehydrogenase [EC:1.1.1.67]	Yes		GCF_001440325.1:WP_057714763.1	mannitol dehydrogenase family protein [Pseudomonas]	Vague		EC:1.1.1.67	High	Yes
pseudo13_GW456_L13	Gammaproteobacteria	Pseudomonas fluorescens GW456-L13	PfGW456L13_5118		enzyme	D-lactate dehydrogenase, FeS subunit; phenotype on glycerol is not explained but maybe there is a side alcohol/aldehyde dehydrogenase pathway?	MSLPAAFLRDAQQLIPQERRFDDPLSTLAFGTDASFYRLIPQLVIRVESEDEVVALLQLAQRDQVPVTFRAAGTSLSGQAISDSVLIVLGDNWNGREIRGQGTQIRLQPGVIGAQANAWLAPFGRKIGPDPASINACKIGGIVANNASGMCCGTAQNTYHTLAGIRLVLADGSRLDTEDAASVTAFRQSHAALLERLAILGRETRANTELAAKIRHKYRLKNTTGLSLNALVDFDEPVDILSHLLVGSEGTLGFISAVTYDTVIDHPNKASALIVFPDVETCCNAVTVLKSQPVSAVELLDRRSLRSVQNKPGMPAFVQHLSNNACALLIESRAASSTLLHEQLAQIMASLKAFPVEKQVDFTEDPQENARLWAIRKDTFPAVGAVRKTGTTVIIEDVT…	sp|A0A0H3KZS3|D2HDH_PANAA	23.566	D-2-hydroxyglutarate dehydrogenase OS=Pantoea ananatis (strain AJ13355) OX=932677 GN=ydiJ PE=1 SV=1	No	Function mentions “no detectable activity on L-2-hydroxyglutarate, L-malate, D-malate, L-lactate, D-lactate, L-tartrate, D-tartrate, L-glycerate, D-glycerate, glutarate, or pyruvate”	K18930	dld; D-lactate dehydrogenase	Yes		GCF_001440325.1:WP_057716494.1	FAD-binding and (Fe-S)-binding domain-containing protein [Pseudomonas]	Vague		EC:1.1.99.14	Medium	Close	“Also acts on (R)-lactate. “
pseudo13_GW456_L13	Gammaproteobacteria	Pseudomonas fluorescens GW456-L13	PfGW456L13_3540		enzyme	branched-chain alpha-ketoacid dehydrogenase, E1 component alpha subunit (EC 1.2.4.4)	MTQAYEPLRLHVPEPSGRPGCKTDFSYLHLTDAGTVRKPPIDVEPADTADLARGLIRVLDDQGNALGPWAENVPVEILRKGMRAMLKTRIYDNRMVVAQRQKKMSFYMQSLGEEAIGSAQALALNIDDMCFPTYRQQSILMARDVPLVDLICQLLSNERDPLKGRQLPIMYSVKDSGFFTISGNLATQFVQAVGWGMASAIKGDTKIASAWIGDGATAESDFHTALTFAHVYRAPVILNVVNNQWAISTFQAIAGGEATTFAGRGVGCGIASLRVDGNDFYAVYAASAWAAERARRNLGPTMIEWVTYRAGPHSTSDDPSKYRPADDWSHFPLGDPIARLKQHLIKIGQWSEEEHAAVSAELEAQVIAAQKEAEQYGTLAGGQIPSAATMFEDVYKEMP…	sp|P09060|ODBA_PSEPU	86.978	2-oxoisovalerate dehydrogenase subunit alpha OS=Pseudomonas putida OX=303 GN=bkdA1 PE=1 SV=2	Yes		K00166	BCKDHA, bkdA1; 2-oxoisovalerate dehydrogenase E1 component subunit alpha [EC:1.2.4.4]	Yes		GCF_001440325.1:WP_057715213.1	3-methyl-2-oxobutanoate dehydrogenase (2-methylpropanoyl-transferring) subunit alpha [Pseudomonas]	Yes		EC:1.2.4.4	High	Yes
pseudo3_N2E3	Gammaproteobacteria	Pseudomonas fluorescens FW300-N2E3	AO353_26885	AO353_26885	enzyme	2-dehydro-6-phosphogluconate reductase, involved in utilization of gluconate and glucose (with alternate N sources), see PMC1951859	MKKQVVLYKKLSAPLMARLHEQAEVTLIDSLDAEGLKRLREALPSAHGLLGASLKLDAELLDLAPRLEAIASVSVGVDNYDIDYLNRRQILLSNTPDVLTETTADTGFALILATARRVVELANLVRAGQWNRNIGPAHFGTDVHGKTLGIIGMGRIGEALAQRGHFGFGMPILYHSHSVKPAVEQRFNAQYRSLPALLQQADFICLTLPLTAETEGLIGAEQFALMRPESIFINISRGKVVDETALIEALRQGQIRAAGLDVFEREPLAYDSPLLQLNNVVATPHIGSATHETREAMARCAVDNLLAALAGERPANLVNGQVWETQNL	sp|B7LTG7|GHRB_ESCF3	60.87	Glyoxylate/hydroxypyruvate reductase B OS=Escherichia fergusonii (strain ATCC 35469 / DSM 13698 / CCUG 18766 / IAM 14443 / JCM 21226 / LMG 7866 / NBRC 102419 / NCTC 12128 / CDC 0568-73) OX=585054 GN=ghrB PE=3 SV=1	No		K00090	ghrB; glyoxylate/hydroxypyruvate/2-ketogluconate reductase [EC:1.1.1.79 1.1.1.81 1.1.1.215]	No	K00032 is correct	GCF_001307155.1:WP_054597706.1	NAD(P)-dependent oxidoreductase [Pseudomonas]	Vague
pseudo3_N2E3	Gammaproteobacteria	Pseudomonas fluorescens FW300-N2E3	AO353_29320	AO353_29320	transporter	putrescine transporter	MNRFGFSRMMLVLGLLFIYMPMLILVIYSFNASKLVTVWGGWSVKWYVGLLDNTQLMGSVVRSLEIACYTSIAAVALGTLAAFVLTRVTRFKGRTLFGGLVTAPLVMPEVITGLSLLLLFVAMAQMIGWPQERGIVTIWIAHTTFCAAYVAVVVSARLRELDLSIEEAAMDLGARPLKVFFLITIPMIAPSLAAGGMMSFALSLDDLVLASFVSGPGSTTLPMEVFSAVRLGVKPEINAVASLILLAVSIVTFMVWYFSRKAEATRKRAIQEAMDQTASESWKQPASQRPATQQIDATA	sp|P0AFL1|POTI_ECOLI	64.906	Putrescine transport system permease protein PotI OS=Escherichia coli (strain K12) OX=83333 GN=potI PE=1 SV=1	Yes		K11074	potI, spuH; putrescine transport system permease protein	Yes		GCF_001307155.1:WP_054598126.1	ABC transporter permease subunit [Pseudomonas]	Vague
pseudo3_N2E3	Gammaproteobacteria	Pseudomonas fluorescens FW300-N2E3	AO353_05935	AO353_05935	enzyme	Kynureninase (EC 3.7.1.3)	MITRNDCLALDAQDPLAHLRHQFALPEGVIYLDGNSLGARPVAALERAQAVIAEEWGNGLIRSWNSAGWRDLPERLGNRLAGLIGAGEGEVVVTDTTSINLFKVLGAALRVQAMRAPTRRVIVSESSNFPTDLYIAEGLMDLLQQGYSLRLVDSPEELAQAIDQDTAVVMLTHVNYKTGYMHDMQAVTALIHECGALAIWDLAHSAGAVPVDLRQAGADYAIGCTYKYLNGGPGSQAFVWVAPQLCDLVTQPLSGWFGHSRQFDMASGYEPSSGIARYLCGTQPITSLAMVECGLEIFAQTDMPSLRRKSLALTDLFIQLVEQRCAAHDLKLITPREHARRGSHVSFEHPQGYAVIQALIAQGVIGDYREPRIMRFGFTPLYTSFTEVFDAVQILGEIL…	sp|P83788|KYNU_PSEFL	89.183	Kynureninase OS=Pseudomonas fluorescens OX=294 GN=kynU PE=1 SV=1	Yes		K01556	KYNU, kynU; kynureninase [EC:3.7.1.3]	Yes		GCF_001307155.1:WP_054594118.1	kynureninase [Pseudomonas]	Yes		EC:3.7.1.3	High	Yes
pseudo3_N2E3	Gammaproteobacteria	Pseudomonas fluorescens FW300-N2E3	AO353_05990	AO353_05990	enzyme	Methylmalonate-semialdehyde dehydrogenase (EC 1.2.1.27)	MNASLTPETTVQKVKLLIDGQWVESQTTEWHDIVNPATQQVLAKVPFATPAEVDAAISAAHRAFQTWKLTPIGARMRIMLKLQALIREHSKRIAVVLSAEQGKTIADAEGDIFRGLEVVEHACSIGSLQMGEFAENVAGGVDTYTLRQPIGVCAGITPFNFPAMIPLWMFPMAIACGNTFVLKPSEQDPMSTMLLVELAIEAGIPAGVLNVVHGGKDVVDALCTHKDIKAVSFVGSTAVGTHVYDLAGKHGKRVQSMMGAKNHAVVLPDANREQALNALVGAGFGAAGQRCMATSVVVLVGAAKQWLPDLKALAQKLKVNAGSEPGTDVGPVISKRAKARILDLIESGIKEGAKLELDGRDITVPGYEKGNFVGPTLFSGVTTDMQIYTQEIFGPVLVV…	sp|Q0WM29|MMSA_ARATH	60.729	Methylmalonate-semialdehyde dehydrogenase [acylating], mitochondrial OS=Arabidopsis thaliana OX=3702 GN=ALDH6B2 PE=1 SV=2	Yes		K00140	mmsA, iolA, ALDH6A1; malonate-semialdehyde dehydrogenase (acetylating) / methylmalonate-semialdehyde dehydrogenase [EC:1.2.1.18 1.2.1.27]	Yes		GCF_001307155.1:WP_054594128.1	CoA-acylating methylmalonate-semialdehyde dehydrogenase [Pseudomonas]	Yes		EC:1.2.1.27 EC:1.2.1.18	High	Yes	1..2.1.18 (forming acetyl-CoA instead of propionyl-CoA) seems questionable, but I’m not sure
pseudo3_N2E3	Gammaproteobacteria	Pseudomonas fluorescens FW300-N2E3	AO353_07660	AO353_07660	enzyme	sarcosine oxidase (5,10-methylenetetrahydrofolate-forming), beta subunit, EC 1.5.3.24	MQRYSGFGLFKHSLSHHENWQRMWRTPTPKKVYDVVIVGGGGHGLATAYYLAKEHGITNVAVVEKGWLGGGNTARNTTIVRSNYLWDESAHLYEHAMKLWEGLSQDLNYNVMFSQRGVYNLCHTLQDIRDSERRVSANRLNGVDGELLTAQQVADEIPYLDCSKNTRYPVMGATVQRRGGVARHDAVAWGFARAADALGVDLIQQTEVIGFRKENGVCIGVETNKGFIGAKRVGVVTAGNSGHMAKLAGFRLPIESHPLQALVSEPIKPIIDSVIMSNAVHGYISQSDKGDLVIGAGIDGYNGYGQRGSYPVIEHTIQAIVEMFPVLSRVRMNRQWGGIVDTTPDACPIISKTPVPNMFFNCGWGTGGFKATPGSGNVFAASLAKGEMHPLAAPFSIDR…	sp|P40875|SOXB_CORS1	62.155	Sarcosine oxidase subunit beta OS=Corynebacterium sp. (strain P-1) OX=69006 GN=soxB PE=1 SV=2	Yes		K00303	soxB; sarcosine oxidase, subunit beta [EC:1.5.3.24 1.5.3.1]	Yes		GCF_001307155.1:WP_019693993.1	sarcosine oxidase subunit beta [Pseudomonas]	Yes		EC:1.5.3.1	High	No	Wrong product, formaldehyde vs. methyleneTHF
pseudo3_N2E3	Gammaproteobacteria	Pseudomonas fluorescens FW300-N2E3	AO353_07665	AO353_07665	enzyme	Serine hydroxymethyltransferase	MFSKQDQIKGYDDALLAAMNAEELRQEDHIELIASENYTSKRVMEAQGSGLTNKYAEGYPGKRYYGGCEHVDKVEALAIERAKLLFGADYANVQPHSGSSANSAVYLALLQAGDTILGMSLAHGGHLTHGAKVSSSGKLYNAVQYGIDTKTGLIDYDEVERLAVECKPKMIVAGFSAYSKTLDFPRFRQIADKVGALLFVDMAHVAGLVAAGLYPNPLPYADVVTTTTHKTLRGPRGGLILAKANEEIEKKLNAAVFPGAQGGPLMHVIAGKAVCFKEALEPGFKAYQQQVIDNAQAMASVFIKRGYDVVSGGTDNHLFLVSLIRQGLTGKEADAALGRAHITVNKNAVPNDPQSPFVTSGLRIGTPAVTTRGFKVTQCIELAGWICDILDNLGDADVE…	sp|Q3K5K9|GLYA3_PSEPF	97.362	Serine hydroxymethyltransferase 3 OS=Pseudomonas fluorescens (strain Pf0-1) OX=205922 GN=glyA3 PE=3 SV=1	Yes		K00600	glyA, SHMT; glycine hydroxymethyltransferase [EC:2.1.2.1]	Yes		GCF_001307155.1:WP_054594371.1	serine hydroxymethyltransferase [Pseudomonas]	Yes		EC:2.1.2.1	High	Yes
pseudo3_N2E3	Gammaproteobacteria	Pseudomonas fluorescens FW300-N2E3	AO353_07780	AO353_07780	transporter	carnitine SBP	MKIGSPSLLLAAMLSLPLLAHAAEPAQCSTVNFSDVGWTDITATTATTSVVLDALGYKTKTTMISVPVTYKSLADGKNMDVFLGNWMPTMENDIKAYRDAGTVETVRTNLKGAKYTLAVPQALYDKGLHDFADITKFKKELDGKIYGIEPGNDGNRLIQSMIDKNAFGLKDAGFKVVESSEAGMLSQVDRAQKRDTAVVFLGWAPHPMNKRFKIQYLTGGDDYFGPDFGAATVLTNTRKGYTQECSNVGQLLKNLEFTVDMESSLMGNILDDKMKPEAAAKAWLKKNPQVLDTWLAGVTTIDGKPGLEAVKAKLAK		NA				K02002	proX; glycine betaine/proline transport system substrate-binding protein	No		GCF_001307155.1:WP_019694015.1	choline ABC transporter substrate-binding protein [Pseudomonas]	No
pseudo3_N2E3	Gammaproteobacteria	Pseudomonas fluorescens FW300-N2E3	AO353_15995	AO353_15995	transporter	trehalose-specific PTS system, I, HPr, and IIA components	MTLTQPLQLLAPLSGVLMPLDHVPDPVFASRVIGDGLCIDPTSQVLCAPLAGVVSNLQHSGHAISITDDSGVQVLLHIGLDTVNLKGQGFSALVEQGQRVEAGQPLIEFDADYVALHARSLLTLMLVVSGEPFSLLTPDSGLVACAQPVLRLSLGDPRTVVAQEEGEALFSKPVHLPNPNGLHARPAAVFAQAAKGFAASICLHKQQDSANAKSLVAIMALQTVHGDALQVSAVGEDAELAISTLAQLLADGCGEAVTPVAVVAPVVEAQEVSTKLLRGVCASAGSAFGYVVQVAERTLEMPEFAADQQLERESLERALMHATQALQRLRDNAAGEAQADIFKAHQELLEDPSLLEQAQALIAEGKSAAFAWNSATEATATLFKSLGSTLLAERALDLM…	sp|P23388|PTFAX_RHOCA	42.365	Multiphosphoryl transfer protein OS=Rhodobacter capsulatus OX=1061 GN=fruB(HI) PE=3 SV=1	No	Function says “he enzyme II FruAB PTS system is involved in fructose transport.” which is a different substrate and confusing given that both proteins have an EIIA domain.	K23993	fruB; multiphosphoryl transfer protein [EC:2.7.3.9 2.7.1.202]	No		GCF_001307155.1:WP_054595825.1	phosphoenolpyruvate--protein phosphotransferase [Pseudomonas]	No	EIIA domain doesn’t fit
pseudo3_N2E3	Gammaproteobacteria	Pseudomonas fluorescens FW300-N2E3	AO353_16285	AO353_16285	transporter	ABC transporter for L-aspartate, L-asparagine, L-glutamate, and L-glutamine, permease component 2	MNYNWDWGVFFKSTGVGSETYLDWFITGLGWTIAIAIVAWIIALMLGSVLGVMRTVPNRLVSGIATCYVELFRNVPLLVQLFIWYFLVPDLLPQNLQDWYKQDLNPTTSAYLSVVVCLGLFTAARVCEQVRTGIQALPRGQESAARAMGFKLPQIYWNVLLPQAYRIVIPPLTSEFLNVFKNSSVASLIGLMELLAQTKQTAEFSANLFEAFTLATLIYFTLNMSLMLLMRMVEKKVAVPGLISVGGK	sp|P0AER3|GLTJ_ECOLI	53.226	Glutamate/aspartate import permease protein GltJ OS=Escherichia coli (strain K12) OX=83333 GN=gltJ PE=1 SV=1	Close	No role for gln/asn uptake reported for GltJ. Also the Pseudomonas asparaginase (AO353_09960) is expected to be cytoplasmic	K10003	gltJ, aatQ; glutamate/aspartate transport system permease protein	Close		GCF_001307155.1:WP_054595878.1	amino acid ABC transporter permease [Pseudomonas]	Vague
pseudo3_N2E3	Gammaproteobacteria	Pseudomonas fluorescens FW300-N2E3	AO353_17195	AO353_17195	enzyme	3-oxoadipate CoA-transferase (EC 2.8.3.6)	MAEILSLHDAVKQFVNDGDTVALEGFTHLIPTAAGHEIIRQGKKDLTLVRMTPDLVYDQLIGAGCARKLIFSWGGNPGVGSLHRLRDAVEKQWPHALEIEEHSHADLANAYVAGASGLPFAVLRAYAGSDLPKVNPLIKSVTCPFTGEVLAAVPSVRPDVTVIHAQKADRKGNVLLWGILGVQKEAALAAKRCIVTVEEIVDDLKAPMNACVLPTWALSAVCHVPGGAHPSYAHGYTERDNRFYQAWDPIARDRETFTAWINEYIHGSADFSEFQAKLAKASEAQ	sp|Q8VPF3|CATI_PSEKB	89.324	3-oxoadipate CoA-transferase subunit A OS=Pseudomonas knackmussii (strain DSM 6978 / LMG 23759 / B13) OX=1301098 GN=catI PE=1 SV=1	Yes		K01039	gctA; glutaconate CoA-transferase, subunit A [EC:2.8.3.12]	No		GCF_001307155.1:WP_054596031.1	CoA transferase subunit A [Pseudomonas]	Vague		EC:2.8.3.6	High	Yes
pseudo3_N2E3	Gammaproteobacteria	Pseudomonas fluorescens FW300-N2E3	AO353_18575	AO353_18575	enzyme	tyrosine aminotransferase (EC 2.6.1.57)	MHFDAIGRVPGDPILGLMEAYAQDSNPCKFDLGVGVYKDAQGLTPIPQSVKLAELRLVDRQTTKTYIGGHGDPAFGKVINELVLGADSALIAEQRVGATQTPGGTGALRLSADFIAHCLPGRGIWLSNPTWPIHETIYATAGLKVSHYPYVGSDNRLDVEAMLATLNLIPKGDVVLLHACCHNPTGFDLSHDDWRRVLEVVRSRELLPLIDFAYQGFGDGLEQDAWAVRLFAAELPELLITSSCSKNFGLYRDRTGALIVCAKDAEKLVDIRSQLANIARNLWSTPPDHGAAVVATILGDPELKQLWADEVEAMRLRIAQLRSGLVEALEPHGLGERFAHIGVQRGMFSYTGLTPAQVKNLRDHHSVYMVSSGRANVAGIDATRLDLLAQAFADVCK	sp|P43336|PHHC_PSEAE	77.975	Aromatic-amino-acid aminotransferase OS=Pseudomonas aeruginosa (strain ATCC 15692 / DSM 22644 / CIP 104116 / JCM 14847 / LMG 12228 / 1C / PRS 101 / PAO1) OX=208964 GN=phhC PE=3 SV=2	Close	AO353_18575 could well be active on other aromatic a.a., but, the phenotype is very specific in various Pseudomonas, and, expression of a close homolog is induced by phe/tyr (phe is catabolized via tyr), PMID:9846749	K00813	aspC; aspartate aminotransferase [EC:2.6.1.1]	No		GCF_001307155.1:WP_162491285.1	aspartate/tyrosine/aromatic aminotransferase [Pseudomonas]	Close		EC:2.6.1.107 EC:2.6.1.57	High	Close	2.6.1.57 is tyrosine; .107 is beta-methylphenylalanine, unlikely
pseudo3_N2E3	Gammaproteobacteria	Pseudomonas fluorescens FW300-N2E3	AO353_18585	AO353_18585	enzyme	Phenylalanine 4-monooxygenase (EC 1.14.16.1)	MKQTQYVAREPDAQGFIHYTAEEHAVWNTLITRQLKVLEGRACQEYMDGIEKLGLPHDRIPQLDEINKVLGETTGWQVARVPALIPFQTFFELLASKQFPVATFIRTREELDYLQEPDIFHEIFGHCPLLTNPWFAEFTHTYGKLGLQASKEERVYLARLYWMTIEFGLVDTPQGKRIYGGGILSSPKETVYSLSGEPEHQAFDPLEAMRTPYRIDILQPLYFVLPNLKRLFDLAHEDIMGMVHQGMQLGLHAPKFPPKPKAA	sp|P43334|PH4H_PSEAE	86.26	Phenylalanine-4-hydroxylase OS=Pseudomonas aeruginosa (strain ATCC 15692 / DSM 22644 / CIP 104116 / JCM 14847 / LMG 12228 / 1C / PRS 101 / PAO1) OX=208964 GN=phhA PE=3 SV=2	Yes		K00500	phhA, PAH; phenylalanine-4-hydroxylase [EC:1.14.16.1]	Yes		GCF_001307155.1:WP_054596268.1	phenylalanine 4-monooxygenase [Pseudomonas]	Yes		EC:1.14.16.1	High	Yes
pseudo3_N2E3	Gammaproteobacteria	Pseudomonas fluorescens FW300-N2E3	AO353_21340	AO353_21340	enzyme	Myo-inosose-2 dehydratase (EC 4.2.1.44)	MPAIRIGINPISWSNDDLPALGGETPLSTALSEGKEIGYEGFELNGKFPKDAKGVGDVLRPYDLALVSGWYSSRLARRSVAEEIEAIGSHVELLAKNGAKVLVYGEVADSIQGQRIPLVERPRFHTEQAWQEYADKLNELARFTLSQGVRLAYHHHMGAYVESPADIDKLMSLTGSEVGLLFDSGHCYMGGGEPLEVLRKHIGRICHVHFKDVRKPVVQLARNNLWSFPDCIINGTFTVPGDGDIDFAALLDVLLAADYHGWLVVEAEQDPAVAPSYVYAKKGYETLRALLDQRTGQ	sp|P49304|MOCC_RHIML	48.951	Rhizopine catabolism protein MocC OS=Rhizobium meliloti OX=382 GN=mocC PE=3 SV=1	Yes	Role of MocC seems not to be known but slightly more distant homologs are annotated as inosose dehydratase (same EC)	K03335	iolE; inosose dehydratase [EC:4.2.1.44]	Yes		GCF_001307155.1:WP_054596733.1	myo-inosose-2 dehydratase [Pseudomonas]	Yes		EC:4.2.1.44	High	Yes
pseudo5_N2C3_1	Gammaproteobacteria	Pseudomonas fluorescens FW300-N2C3	AO356_17550	AO356_17550	enzyme	N-acetylglucosamine-6-phosphate deacetylase (EC 3.5.1.25)	MSEDNILTCDGWVRGRLLHEHGRVVAIEGQPCDPASNDLPYLLPGFIDLHVHGGGGKDIMQGASAFETIARTHLRFGTTALLATTMTAPSEEIASVLQALGEFCEQRPNGSARVLGVHLEGPYINPGKLGAQPNFAHTALLAEVESYLALAPIRVITIAPEIAGHDALIRALSARGVRMQIGHTLGSYEEGVAALAAGASSFTHLYNAMSPLHHREPGIVGAALAHAQYAELIPDLLHVHPGAMRVALRSIPCLYCVTDSTAAAGMPDGEYKLGSHTVTKCLGGVRLADGTLAGSTLTMDQALRNLVKIGLPIAEASQRLSQFPADYLGLPERGRLQPGAWADCVRLDRSLTLTDVMVEGEAIDFQNA	sp|Q8XAC3|AGAA_ECO57	39.362	N-acetylgalactosamine-6-phosphate deacetylase OS=Escherichia coli O157:H7 OX=83334 GN=agaA PE=1 SV=2	Yes		K01443	nagA, AMDHD2; N-acetylglucosamine-6-phosphate deacetylase [EC:3.5.1.25]	Yes		GCF_001307275.1:WP_060740821.1	N-acetylglucosamine-6-phosphate deacetylase [Pseudomonas]	Yes		EC:3.5.1.25	High	Yes
pseudo5_N2C3_1	Gammaproteobacteria	Pseudomonas fluorescens FW300-N2C3	AO356_20280	AO356_20280	enzyme	2-dehydro-3-deoxygalactonokinase DgoK (EC 2.7.1.58)	MQAQLIALDWGTTSLRAYKLAAGGEVLEQRSLSSGIMQLPSGPRNVAGQVCIDGFELAFDEACGDWLDAQPGLPVIACGMVGSAQGWREAPYCDTPANVANLGHSLQTVRSLRGVDVHIVPGVIQRSRLPNVMRGEETQVLGALHSLPDEAVLIGLPGSHSKWVEVADGRIVHFDTFMTGEIFAVLSDHSILGRTQQRSVTFDGVAFDRGVQVALSVDGQIGPLSTVFSARSLGLTGELGASAQADYLSGLLIGHELTALAQVQRRRRDSLHLPTVVLIGNSQLCVRYQRALDACGFARVVLAEQATERGLWQLAVAAGLLDSTAP	sp|Q92RN7|DGOK_RHIME	36.129	Probable 2-dehydro-3-deoxygalactonokinase DgoK1 OS=Rhizobium meliloti (strain 1021) OX=266834 GN=dgoK1 PE=1 SV=1	Yes		K00883	dgoK; 2-dehydro-3-deoxygalactonokinase [EC:2.7.1.58]	Yes		GCF_001307275.1:WP_060741252.1	2-dehydro-3-deoxygalactonokinase [Pseudomonas]	Yes		EC:2.7.1.58	Medium	Yes
pseudo5_N2C3_1	Gammaproteobacteria	Pseudomonas fluorescens FW300-N2C3	AO356_00020	AO356_00020	transporter	ABC transporter for D-Sorbitol, permease component 2	MNTSIIRAQLAASAPSRARRLINPGWFLVSPSVALLLLWMIVPLAMTVYFSVIRYNLLNPGENEFVGLENFAYFVTDSGFLPGALNTLILVGSVLLISVIFGVLIAALLEASEFFGRGIVRVLLISPFFIMPTVGSLIFKNLIFHPVSGILAAVWKFFGAQPVDWLAHYPLFSIIVIVSWQWLPFAILLLMTAMQSLDQEQKEAARLDGAGALAIFWHLTLPHLARPIAVVVMIETIFLLSVFAEIFTTTNGGPGFASTNLAYLIYNQALVQFDVGMASAGGLIAVVIANIAAIVLVRMIGKNLTDKA	sp|P55602|Y4OQ_SINFN	36.742	Probable ABC transporter permease protein y4oQ OS=Sinorhizobium fredii (strain NBRC 101917 / NGR234) OX=394 GN=NGR_a02190 PE=3 SV=1	Vague	Next-best hits do not have specific annotations either	K10228	smoF, mtlF; polyol transport system permease protein	Yes		GCF_001307275.1:WP_013692785.1	sugar ABC transporter permease [Pseudomonas]	Vague
pseudo5_N2C3_1	Gammaproteobacteria	Pseudomonas fluorescens FW300-N2C3	AO356_07325	AO356_07325	transporter	fructose PTS, IIB/IIC components	MKLAIVTACPNGMVTSVLCARLLDAAAQRQGWSTSVEVHDAAHPERQLSAATLEAAEWVLLVASGPVDLSRFVGKRVFRSTPALALQDVDAVLRRGAVEAEVLGEADASAQVPAASAERAPRLVAITACPTGVAHTFMAAEALQQAATKLGYDLQVETQGSVGARNPLSAEAIAEADVVLLATDIEVATERFAGKKIYRCGTGIALKQAEATLNKALVEARQESASSGASAPAKSEKTGAYKHLLTGVSFMLPMVVAGGLMIALSFVFGIEAFKEPGTLAAALMQIGGETAFKLMVPLLAGYIAYSIADRPGLAPGMIGGMLASTLGAGFIGGIIAGFLAGYAAKAISRYARLPQSLEALKPILIIPLLASLFTGLVMIYIVGKPVAGMLEALTHFLDS…	sp|Q9KM72|PTFBC_VIBCH	61.336	PTS system fructose-specific EIIB'BC component OS=Vibrio cholerae serotype O1 (strain ATCC 39315 / El Tor Inaba N16961) OX=243277 GN=fruA PE=2 SV=1	Yes	I missed the B’ component (but the reannotated ortholog, AZOBR_RS32335, is correct)	K02770	fruA; fructose PTS system EIIBC or EIIC component [EC:2.7.1.202]	Yes		GCF_001307275.1:WP_060739203.1	PTS fructose-like transporter subunit IIB [Pseudomonas]	Vague
pseudo5_N2C3_1	Gammaproteobacteria	Pseudomonas fluorescens FW300-N2C3	AO356_08365	AO356_08365	enzyme	helps incorporate Ni into urease; important for utilization of urease as N source	MNLPVCSLAPSALFTPSWHAELELGYARFGECTRPVQRRHKGPLRVQKHLYAEGPEVCQHIIVHPPGGIAGGDRLDISAHVGPGAWAQLTSPGAAKWYRAAGPAYQQLSLSVAPGATLEWLPQETIVFSAAQAELGTSIDLQGDARLFYWDMVALGRPASGERFDLGHFQSRLDIRRDGQLLWHERQRIVGGDGLLDSPIGLDGNPVFATLLVTGEIDSEQLEHCRSLGHAVRGDLTQLPGLVVARCLASEALLARGWLIELWRLLRPALLGREAMPPRIWST	sp|Q3KIS7|URED_PSEPF	86.572	Urease accessory protein UreD OS=Pseudomonas fluorescens (strain Pf0-1) OX=205922 GN=ureD PE=3 SV=1	Yes		K03190	ureD, ureH; urease accessory protein	Yes		GCF_001307275.1:WP_060739378.1	urease accessory protein UreD [Pseudomonas]	Yes		EC:2.4.2.3 EC:2.3.1.184	Low	No	uridine phosphorylase or acyl-homoserine-lactone synthase
pseudo5_N2C3_1	Gammaproteobacteria	Pseudomonas fluorescens FW300-N2C3	AO356_09615	AO356_09615	transporter	ABC transporter for L-Histidine, permease component	MFPESFTFSIADWVNGWVDSLVTNYGDVFRHISDTLLWAIVNLEGLLRMAPWWLMLAIVGGIAWHATRKVLATAVIVGLLFLVGAVGLWDKLMQTLALMLVATLISVLIGIPLGILSARSNRLRSVLMPLLDIMQTMPSFVYLIPVLMLFGLGKVPAIFATVIYAAPPLIRLTDLGIRQVDGEVMEAINAFGANRWQQLFGVQLPLALPSIMAGINQTTMMALSMVVIASMIGARGLGEDVLVGIQTLNVGRGLEAGLAIVILAVVIDRITQAYGRPRHEVSK	sp|P46921|OPUAB_BACSU	44.487	Glycine betaine transport system permease protein OpuAB OS=Bacillus subtilis (strain 168) OX=224308 GN=opuAB PE=1 SV=1	No		K02001	proW; glycine betaine/proline transport system permease protein	No		GCF_001307275.1:WP_060739588.1	proline/glycine betaine ABC transporter permease [Pseudomonas]	No
pseudo5_N2C3_1	Gammaproteobacteria	Pseudomonas fluorescens FW300-N2C3	AO356_09645	AO356_09645	enzyme	Formiminoglutamic iminohydrolase (EC 3.5.3.13)	MSAFFAERALLPSGWAHDVRLEVDAKGVLTHIQAGSHADGAERLGGPLLPGMPNLHSHAFQRAMAGLAEVAGNPNDSFWTWRDLMYRLVGKISPDQLGIIARQLYIEMLKAGYTSVAEFHYVHHDTDGAPYADPAELALRISHAASAAGIGLTLLPVLYSHSGFGGQAPNDGQRRFINSTENYLKLQSRLQPILAGQPAQALGLCFHSLRAVTPGQIQDVLAASDRDCPVHIHIAEQQKEVDDCLSWSGARPLQWLYENTEVDQRWCLVHATHANAQEVSLMAKSRAIAGLCLTTEANLGDGIFPAVDFLAQGGRLGIGSDSHVSLSVVEELRWLEYGQRLRDQRRNRLYRADQPMVGRTLFDAALEGGAQALGQPVGALDIGKRADWLVLDGNDPYLA…	sp|Q9HU77|HUTF_PSEAE	78.855	Formimidoylglutamate deiminase OS=Pseudomonas aeruginosa (strain ATCC 15692 / DSM 22644 / CIP 104116 / JCM 14847 / LMG 12228 / 1C / PRS 101 / PAO1) OX=208964 GN=hutF PE=1 SV=1	Yes		K05603	hutF; formimidoylglutamate deiminase [EC:3.5.3.13]	Yes		GCF_001307275.1:WP_060739592.1	formimidoylglutamate deiminase [Pseudomonas]	Yes		EC:3.5.4.3	Low	No	guanine deaminase
pseudo5_N2C3_1	Gammaproteobacteria	Pseudomonas fluorescens FW300-N2C3	AO356_09910	AO356_09910	transporter	ABC transporter for L-Lysine, permease component 2	MNWDVIIKWLPKLAQGATLTLELVAIAVIAGLLLAIPLGIARSSRLWQVRALPYAYIFFFRGTPLLVQLFLVYYGLAQFDAVRSSALWPYLRDPFWCATVTMTLHTAAYIAEILRGAIQAIPKGEIEAARALGMSRPKALFYIMLPRAARIGLPAYSNEVILMLKASALASTVTLLELTGMARTIIARTYLPVEIFFAAGMFYLLMSFLLVQGFKQLERWLRVDACQGR	sp|P35114|OCCM_RHIRD	49.515	Octopine transport system permease protein OccM OS=Rhizobium radiobacter OX=358 GN=occM PE=2 SV=2	No		K23057	K23057; putative lysine/arginine/ornithine/histidine/octopine transport system permease protein	Yes		GCF_001307275.1:WP_060739629.1	ABC transporter permease [Pseudomonas]	Vague
pseudo5_N2C3_1	Gammaproteobacteria	Pseudomonas fluorescens FW300-N2C3	AO356_13160	AO356_13160	transporter	SBP for putrescine (possibly spermidine too, given homolog in P.aeruginosa)	VPVFSLLRNALLVGAGLTLAVSVQAASTVHIYNWSDYIGETTLADFEKATGIKPVYDVFDSNETLEGKLLAGRTGYDVVVPSNHFLGKQIKAGAFQKLDKAQLPNYANLDPVLLKRLEKNDPGNQYAVPYLWGTNGIGYNVEKIKAVLGVEKIDSWAMLFEPENIKKLSSCGVSFLDSGDEMIPAMLNYLGLNPNSEDPEDYKKAEAQLLKIRPYVTYFNSSKYISDLANGEICVAAGFSGDIFQARARASEAGKGVNIAYVIPKEGGNLWFDMLAIPRDATNVKQAHAFINYVLKPEVIAQVSDVVGYANPNPKAGELMDQKVRTDEAVYPPQAVVDKLYVNSELPPKIQRLMTRSWTKVKSGK	sp|Q9I6J0|SPUE_PSEAE	67.956	Spermidine-binding periplasmic protein SpuE OS=Pseudomonas aeruginosa (strain ATCC 15692 / DSM 22644 / CIP 104116 / JCM 14847 / LMG 12228 / 1C / PRS 101 / PAO1) OX=208964 GN=spuE PE=1 SV=1	No	Function: “Does not bind putrescine”	K11073	potF, spuD, spuE; putrescine transport system substrate-binding protein	Yes		GCF_001307275.1:WP_060740158.1	polyamine ABC transporter substrate-binding protein [Pseudomonas]	Close
pseudo5_N2C3_1	Gammaproteobacteria	Pseudomonas fluorescens FW300-N2C3	AO356_13815	AO356_13815	transporter	ABC transporter for Carnitine, periplasmic substrate-binding component 1	MKGSKPLLLAAMLSLPMLANAADPEKCSTVNFSDVGWTDITVTTATTSVVLDALGYKTKTTMISVPVTYKSLADGKNMDVFLGNWMPTMENDIKAYREAGTVETVRTNLKGAKYTLAVPQALYDKGLHDFADIPKFKKELDGKIYGIEPGNDGNRLIQSMIEKNAFGLKDAGFKVVESSEAGMLSQVDRASKRGTDVVFLGWAPHPMNTRFKIQYLTGGDDFFGPDFGAATVATNTRKGYSQECSNVGQLLKNLEFTVDMESQLMGNVLDDKMKPEAAAKAWLKKNPQVLDTWLAGVTTIDGKPGLEAVKAKLAQ		NA				K02002	proX; glycine betaine/proline transport system substrate-binding protein	No		GCF_001307275.1:WP_060740270.1	choline ABC transporter substrate-binding protein [Pseudomonas]	No
pseudo5_N2C3_1	Gammaproteobacteria	Pseudomonas fluorescens FW300-N2C3	AO356_13845	AO356_13845	enzyme	Carnitine 3-dehydrogenase (EC 1.1.1.108)	MSFITDIKTFAALGSGVIGSGWVSRALAHGLDVVAWDPAPGAEAALRKRVANAWGALEKQGLAPGASQDRLRFVATIEECVRDADFIQESAPERLELKLELHGQISAAAKPNALIGSSTSGLLPSEFYEGCTHPERCVVGHPFNPVYLLPLVEVVGGKHTAPEAVQAAMQVYESLGMRPLHVRKEVPGFIADRLLEALWREALHLVNDGVATTGEIDDAIRFGAGLRWSFMGTFLTYTLAGGDAGMRHFMAQFGPALQLPWTYLPAPELTEKLIDDVVDGTSEQLGSHSISALERYRDDCLLAVLEAVKTTKAKHGMAFEE	sp|Q4ZSC0|LCDH_PSEU2	89.937	L-carnitine dehydrogenase OS=Pseudomonas syringae pv. syringae (strain B728a) OX=205918 GN=lcdH PE=3 SV=1	Yes		K17735	lcdH, cdhA; carnitine 3-dehydrogenase [EC:1.1.1.108]	Yes		GCF_001307275.1:WP_060740276.1	L-carnitine dehydrogenase [Pseudomonas]	Yes		EC:1.1.1.108	High	Yes
pseudo5_N2C3_1	Gammaproteobacteria	Pseudomonas fluorescens FW300-N2C3	AO356_14110	AO356_14110	transporter	D-serine transporter (conserved phenotype)	MQAANPRRGYILGLSAYIIWGLFPIYFKAIASVPSVEIIIHRVLWSALFGAALLLVWKHPGWWRELRDNPQRLAILALSGTLIAANWLTYVWAVNNERMLEASLGYYINPLVNVLLGMVILGERLRRMQWLAVGLAAVGVAQQVWQVGSLPWVSLVLALTFGFYGLIRKQAPVKALPGLVVETWMLVPIAIAWLLFNPTATSAQAAFWTTSEAWWLVAAGPVTLVPLVCFNAATRHLPYTTIGFLQYIAPTLVLLLAVLLFGEHLSSSTLVAFLFIWAGLAVYSVDAVISMRRRS	sp|Q9I633|Y485_PSEAE	74.061	Uncharacterized transporter PA0485 OS=Pseudomonas aeruginosa (strain ATCC 15692 / DSM 22644 / CIP 104116 / JCM 14847 / LMG 12228 / 1C / PRS 101 / PAO1) OX=208964 GN=PA0485 PE=3 SV=1	Vague		K05786	rarD; chloramphenicol-sensitive protein RarD	No		GCF_001307275.1:WP_060740322.1	EamA family transporter RarD [Pseudomonas]	No
pseudo5_N2C3_1	Gammaproteobacteria	Pseudomonas fluorescens FW300-N2C3	AO356_16835	AO356_16835	enzyme	Maleylacetoacetate isomerase (EC 5.2.1.2)	MELYTYYRSTSSYRVRIALALKGLDYQALPVNLIAAPGGEHRQPAYLAINPQGRVPALRTDEGALLVQSPAIIEYLEERYPQVPLLSADLAVRAHERGVAALIGCDIHPLHNVSVLNQLRQWGHDEAQVTEWIGHWISQGLAAVEQLIGDDGYCFGALPGLADVFLIPQLYAAERFNVSLQGYPRIRRVAALAAVHPAFQQAHPAKQPDTP	sp|P57109|MAAI_PSEAE	81.043	Maleylacetoacetate isomerase OS=Pseudomonas aeruginosa (strain ATCC 15692 / DSM 22644 / CIP 104116 / JCM 14847 / LMG 12228 / 1C / PRS 101 / PAO1) OX=208964 GN=maiA PE=3 SV=1	Yes		K01800	maiA, GSTZ1; maleylacetoacetate isomerase [EC:5.2.1.2]	Yes		GCF_001307275.1:WP_060740709.1	maleylacetoacetate isomerase [Pseudomonas]	Yes		EC:5.2.1.2	High	Yes
pseudo5_N2C3_1	Gammaproteobacteria	Pseudomonas fluorescens FW300-N2C3	AO356_22970	AO356_22970	enzyme	Branched-chain amino acid aminotransferase (EC 2.6.1.42)	MGNESINWDKLGFDYIKTDKRYLSHWRDGAWDAGTLTDDNVLHISEGSTALHYGQQCFEGLKAYRCKDGSINLFRPDQNAARMQRSCARLLMPQVETEQFVEACKQVVRANERFIPPYGTGGALYLRPFVIGVGDNIGVRTAPEFIFSIFCIPVGAYFKGGLTPHNFLISSFDRAAPQGTGAAKVGGNYAASLMPGSQAKKASFADCIYLDPMTHSKIEEVGSANFFGITHDNTFVTPRSPSVLPGITRLSLIELAKSRLGLEVIEGDVFIDKLSDFKEAGACGTAAVITPIGGISYKDKLHVFHSETEVGPITQKLYKELTGVQTGDVEAPAGWIVKV	sp|P54689|ILVE_HAEIN	68.915	Branched-chain-amino-acid aminotransferase OS=Haemophilus influenzae (strain ATCC 51907 / DSM 11121 / KW20 / Rd) OX=71421 GN=ilvE PE=3 SV=1	Yes		K00826	E2.6.1.42, ilvE; branched-chain amino acid aminotransferase [EC:2.6.1.42]	Yes		GCF_001307275.1:WP_060741700.1	branched-chain amino acid aminotransferase [Pseudomonas]	Yes		EC:2.6.1.42	High	Yes
pseudo5_N2C3_1	Gammaproteobacteria	Pseudomonas fluorescens FW300-N2C3	AO356_22990	AO356_22990	enzyme	branched-chain alpha-ketoacid dehydrogenase, E1 component alpha subunit (EC 1.2.4.4)	MNPAYEPLRLHVPEPSGRPGCKTDFSYLHLSDAGTVRKPPIDVEPADTADLARSLIRVLDDQGNALGDWAADIPVEILRKGMRAMLKTRIYDNRMVVAQRQKKMSFYMQSLGEEAIGSAQALALNIDDMCFPTYRQQSILMAREVPLVDLICQLLSNERDPLKGRQLPIMYSVKDAGFFTISGNLATQFIQGVGWGMASAIKGDTKIASAWIGDGATAESDFHTALTFAHVYRAPVILNVVNNQWAISTFQAIAGGEATTFAGRGVGCGIASLRVDGNDFMAVYAASRWAAERARRNLGPALIEWVTYRAGPHSTSDDPSKYRPADDWSHFPLGDPIARLKQHMVKIGQWSEEEHAAVSAELEAEVIAAQKEAEQYGTLAGGQIPSAATMFEDVYKEMP…	sp|P09060|ODBA_PSEPU	86.486	2-oxoisovalerate dehydrogenase subunit alpha OS=Pseudomonas putida OX=303 GN=bkdA1 PE=1 SV=2	Yes		K00166	BCKDHA, bkdA1; 2-oxoisovalerate dehydrogenase E1 component subunit alpha [EC:1.2.4.4]	Yes		GCF_001307275.1:WP_060741704.1	3-methyl-2-oxobutanoate dehydrogenase (2-methylpropanoyl-transferring) subunit alpha [Pseudomonas]	Yes		EC:1.2.4.4	High	Yes
pseudo6_N2E2	Gammaproteobacteria	Pseudomonas fluorescens FW300-N2E2	Pf6N2E2_5403		transporter	ABC transporter for D-Alanine, permease component 2; may also uptake histidine	VRAWVFQVVTVVAVIALGWFLFDNTQTNLQHRGITSGFGFLERSAGFGIAQHLIDYTEADSYARVFLIGLLNTLLVTFIGVILATILGFIIGVARLSQNWIISKLATVYVEVFRNIPPLLQILFWYFAVFLSMPGPRAAHNFGDTFFVSSRGLNMPAALVAEGFWPFVISVVLAIVAIVLMTRWANKRFEATGEPFHKFWVGLALFLVIPALSALLFGAPVHWEMPELKGFNFVGGWVLIPELLALTLALTVYTAAFIAEIVRSGIKSVSHGQTEAARSLGLRNGPTLRKVIIPQALRVIIPPLTSQYLNLAKNSSLAAGIGYPEMVSLFAGTVLNQTGQAIEVIAITMSVYLAISISISLLMNWYNKRIALIER	sp|P45767|YHDX_ECOLI	63.032	Putative amino-acid ABC transporter permease protein YhdX OS=Escherichia coli (strain K12) OX=83333 GN=yhdX PE=3 SV=3	Vague	Also similar to AAPQ_RHIL3 which has broad specificity	K09970	aapQ, bztB; general L-amino acid transport system permease protein	Vague		GCF_001623525.1:WP_063324518.1	amino acid ABC transporter permease [Pseudomonas]	Vague
pseudo6_N2E2	Gammaproteobacteria	Pseudomonas fluorescens FW300-N2E2	Pf6N2E2_5486		transporter	Alpha-ketoglutarate permease	MDNSNALPLGSAAVPARERTTASRIKSIFSGSVGNMVEWYDWYVYAAFSLYFAKVFFPKGDTTAQLLNTAAIFAVGFLMRPIGGWLMGLYADRAGRKRALMASVYLMCFGSLIIALSPSYETIGVGAPILLVFARLLQGLSVGGEYGTSATYLSEMATKERRGFFSSFQYVTLISGQLIALGVLIVLQQFLTTEQLYAWGWRIPFAIGALCAIVALYLRRGMEETESFTKKEKAKESAMRTLLRHPKELMTVVGLTMGGTLAFYTYTTYMQKYLVNTVGMSISDSTTISAATLFLFMCLQPVIGGLSDKIGRRPILIAFGILGTLFTVPILTTLHTIQTWWGAFFLIMAALIIVSGYTSINAVVKAELFPTEIRALGVGLPYALTVSIFGGTAEYIALW…	sp|P0AEX4|KGTP_SHIFL	54.63	Alpha-ketoglutarate permease OS=Shigella flexneri OX=623 GN=kgtP PE=3 SV=1	Yes		K03761	kgtP; MFS transporter, MHS family, alpha-ketoglutarate permease	Yes		GCF_001623525.1:WP_063324580.1	MFS transporter [Pseudomonas]	Vague
pseudo6_N2E2	Gammaproteobacteria	Pseudomonas fluorescens FW300-N2E2	Pf6N2E2_1965		enzyme	Fructokinase (EC 2.7.1.4)	MNMQLPSVVVFGEALTDVVQHSPGRWQGYPGGAPWNVARAMSRLGVPTAFAGSISTDSLGDELAQQSKAAGLDMRFLQRVDADPLVAIVPSSHPPRYFFAGEADLLFDVDQLPAGWLDAARLCHFSCISLARQPLGDRLVEVARRVKEEDKLISYDPNWRNLMDTRYRELTFPAMVELADIIKLSDEDLRQIYPGLNEEQALHTLRTMNASAQILFTRGAKGMALYAADVKFEQPAIAVEVADTVGAGDSSMAGWLASTLLGIQEPHARLEFSAACASVSCSHAGAYAPSREEVEDLLSNRMQHQR	sp|Q9C524|SCRK6_ARATH	29.63	Probable fructokinase-6, chloroplastic OS=Arabidopsis thaliana OX=3702 GN=At1g66430 PE=2 SV=1	Yes		K00847	E2.7.1.4, scrK; fructokinase [EC:2.7.1.4]	Yes		GCF_001623525.1:WP_063321906.1	carbohydrate kinase [Pseudomonas]	Vague
pseudo6_N2E2	Gammaproteobacteria	Pseudomonas fluorescens FW300-N2E2	Pf6N2E2_2376		transporter	nitrate transporter only, probably (see B.subtilis nasA, defect on nitrate only, like this)	MNSSFWKSGHTPTLFAAFLYFDLSFMVWYLLGPLAVQISADLHLTTQQRGLMVATPILAGAVLRLFMGLLADRISPKTAGMVGQVIVIGALFCAWKLGIHSYEQALLLGLFLGVAGASFAVALPLASQWYPPQHQGKAMGIAGAGNSGTVLAALIAPVMAVAFGWSNVFGFALIPLVLTLVLFAWLAKNAPERPKAKSMADYLKALGDRDSWWFMFFYSVTFGGFIGLASALPGYFNDQYGLSPVTAGYYTAACVFGGSLMRPLGGALADRFGGIRTLLGMYTVAAVCIAAVGFNLPSSYAALALFVCTMLGLGAGNGAVFQLVPQRFRREIGVMTGLIGMAGGIGGFALAAGMGAIKQSTGSYQLALWLFASLGVLAWFGLHGVKRRWRTTWGSAAVT…	sp|P42432|NASA_BACSU	47.619	Nitrate transporter OS=Bacillus subtilis (strain 168) OX=224308 GN=nasA PE=2 SV=2	Yes		K02575	NRT2, narK, nrtP, nasA; MFS transporter, NNP family, nitrate/nitrite transporter	Close		GCF_001623525.1:WP_039589025.1	nitrate/nitrite transporter [Pseudomonas]	Close
pseudo6_N2E2	Gammaproteobacteria	Pseudomonas fluorescens FW300-N2E2	Pf6N2E2_2630		enzyme	Phenylalanine 4-monooxygenase (EC 1.14.16.1)	MKQTQYVAREPDAQGFIHYTAEEHAVWNTLITRQLKVIEGRACQEYLDGIDKLGLPHDRIPQLDEINKVLGETTGWQVARVPALIPFQTFFELLASKQFPVATFIRTREELDYLQEPDIFHEIFGHCPLLTNPWFAEFTHTYGKLGLQASKEERVYLARLYWMTIEFGLVQTPQGRRIYGGGILSSPKETVYCLSDEPEHQAFDPLEAMRTPYRIDILQPVYFVLPELKRLFDLAHEDIMGMVKRGRELGLHAPKFPPKAA	sp|P43334|PH4H_PSEAE	85.441	Phenylalanine-4-hydroxylase OS=Pseudomonas aeruginosa (strain ATCC 15692 / DSM 22644 / CIP 104116 / JCM 14847 / LMG 12228 / 1C / PRS 101 / PAO1) OX=208964 GN=phhA PE=3 SV=2	Yes		K00500	phhA, PAH; phenylalanine-4-hydroxylase [EC:1.14.16.1]	Yes		GCF_001623525.1:WP_053120239.1	phenylalanine 4-monooxygenase [Pseudomonas]	Yes		EC:1.14.16.1	High	Yes
pseudo6_N2E2	Gammaproteobacteria	Pseudomonas fluorescens FW300-N2E2	Pf6N2E2_3577		transporter	ABC transporter for L-leucine/L-isoleucine/L-phenylalanine/D-alanine, ATPase component 1 LivG	MSEVVLKVENLMMQFGGIKALSDVSLQVKRNSIFALIGPNGAGKTTVFNCLTGFYKASGGKIELNVRGEQTNVIKLLGEAFRPTDFVSPKSFASRLYYKMFGGTHLVNRAGLARTFQNIRLFKEMSVLENLLVAQHMWVNRSMVAGILNTKGYRKAESDALDHAFYWLEVVDLVDCANRLAGELSYGQQRRLEIARAMCTRPQIICLDEPAAGLNPQETEALSAMIRLLRDEHDLTVVLIEHDMGMVMSISDHIVVLDHGNVIAEGGPEAIRNDPKVIAAYLGADEEELV	sp|P21629|BRAF_PSEAE	51.59	High-affinity branched-chain amino acid transport ATP-binding protein BraF OS=Pseudomonas aeruginosa (strain ATCC 15692 / DSM 22644 / CIP 104116 / JCM 14847 / LMG 12228 / 1C / PRS 101 / PAO1) OX=208964 GN=braF PE=3 SV=1	Yes	Function field mentions alanine as well	K01995	livG; branched-chain amino acid transport system ATP-binding protein	Close		GCF_001623525.1:WP_063323162.1	ATP-binding cassette domain-containing protein [Pseudomonas]	Vague
pseudo6_N2E2	Gammaproteobacteria	Pseudomonas fluorescens FW300-N2E2	Pf6N2E2_3799		enzyme	Histidine ammonia-lyase (EC 4.3.1.3)	MTALNLIPGQLSLAQLRDIYQQPVTLSLDASASAQIEASVACVEQILAENRTAYGINTGFGLLASTRIASEDLENLQRSLVLSHAAGVGEPISDALVRLVMVLKVNSLSRGFSGIRRQVIDALIALINAEVYPHIPLKGSVGASGDLAPLAHMSLVLLGEGKARYKGEWLPAVEALKVAGLAPLTLAAKEGLALLNGTQVSTAFALRGLFEGEDLFAGALALGGLTVEAVLGSRSPFDARIHAARGQKGQIDAAAAYRDLLGERSEVSDSHQNCDKVQDPYSLRCQPQVMGACLTQFRQAAEVLVIEANAVSDNPLVFAAEGDVISGGNFHAEPVAMAADNMALAIAEIGSLSERRISLMMDKHMSQLPPFLVANGGVNSGFMIAQVTAAALASENKAL…	sp|Q3KJE6|HUTH_PSEPF	94.51	Histidine ammonia-lyase OS=Pseudomonas fluorescens (strain Pf0-1) OX=205922 GN=hutH PE=3 SV=1	Yes		K01745	hutH, HAL; histidine ammonia-lyase [EC:4.3.1.3]	Yes		GCF_001623525.1:WP_063323336.1	histidine ammonia-lyase [Pseudomonas]	Yes
pseudo6_N2E2	Gammaproteobacteria	Pseudomonas fluorescens FW300-N2E2	Pf6N2E2_4704		enzyme	DgcB Dimethylglycine demethylase subunit B (EC 1.5.3.-)	MLNTLLPILLFAALGLAVLGALRRVNMWRRGRPSKVDLIGGLFAMPKRYMVDLHHVVARDKYIANTHVATAGGAVASVVLAILVHGFGLHNRFLGYALLLMTAVMFVGAIFVYLRRRNPPARLSKGPWMRLPKSLLAFSASFFLVTLPVAGILPENFGGWLVAAVLGVGVLWGVSELFFGMTWGGPMKHAFAGALHLAWHRRAERFGGGRSTGLKPLDLNDPAAPLGVEKPRDFTWNQLLGFDACVQCGKCEAACPAFAAGQPLNPKKLIQDMVVGLAGGTDAKFAGSPYPGKPVGEHGGNPHQPIVNGLVDAETLWSCTTCRACVEECPMMIEHVDAIVDMRRHLTLEKGATPNKGAEVLENLIATDNPGGFAPGGRMNWAADLNLNLLSEKKSTDVL…	sp|Q1QYW0|ETFFR_CHRSD	72.061	Probable membrane-anchored ferredoxin csal_0991 OS=Chromohalobacter salexigens (strain ATCC BAA-138 / DSM 3043 / CIP 106854 / NCIMB 13768 / 1H11) OX=290398 GN=Csal_0991 PE=3 SV=1	Yes	Function: “Probably transfers the electrons from N,N-dimethylglycine/sarcosine dehydrogenase (DMGDH) to the electron transfer flavoprotein”	K21834	dgcB; N,N-dimethylglycine/sarcosine dehydrogenase ferredoxin subunit	Yes		GCF_001623525.1:WP_063324040.1	dimethylglycine demethylation protein DgcB [Pseudomonas]	Yes		EC:1.8.98.1	Medium	No	CoB--CoM heterodisulfide reductase
pseudo6_N2E2	Gammaproteobacteria	Pseudomonas fluorescens FW300-N2E2	Pf6N2E2_496		enzyme	Dihydropyrimidine dehydrogenase (NADP(+)) (EC 1.3.1.2)	MADLSIVFAGIKAPNPFWLASAPPTDKAYNVVRAFEAGWGGVVWKTLGEDPAAVNVSSRYSAHYGANREVLGINNIELITDRSLEINLREITQVKKDWPDRALIVSLMVPCVEESWKRILPLVEATGADGIELNFGCPHGMPERGMGAAVGQVPEYVEQVTRWCKTYCSLPVIVKLTPNITDIRVAARAAHRGGADAVSLINTINSITSVDLDRMVALPSVGSQSTHGGYCGSAVKPIALNMVAEIARDPQTQGLPICGIGGIGSWRDAAEFIALGSGAVQVCTAAMLHGFRIVDEMKDGLSRWMDEHGHANLQAFSGRAVSNTTDWKYLDINYQVIAKIDQEACIGCGRCHIACEDTSHQAIASLKQADGTRKYEVIDEECVGCNLCQITCPVQDCIE…	sp|Q8ZNL7|PREA_SALTY	43.704	NAD-dependent dihydropyrimidine dehydrogenase subunit PreA OS=Salmonella typhimurium (strain LT2 / SGSC1412 / ATCC 700720) OX=99287 GN=preA PE=3 SV=1	Close	Logically, the catabolic (reductive) enzyme should be NADP dependent, but the E. coli enzyme does prefer NAD and seems to have a different role.	K17723	preA; dihydropyrimidine dehydrogenase (NAD+) subunit PreA [EC:1.3.1.1]	Close		GCF_001623525.1:WP_063320663.1	NAD-dependent dihydropyrimidine dehydrogenase subunit PreA [Pseudomonas]	Close		EC:1.3.1.1	Medium	Close	NADH vs. NADPH cofactor
pseudo6_N2E2	Gammaproteobacteria	Pseudomonas fluorescens FW300-N2E2	Pf6N2E2_512		enzyme	5-dehydro-2-deoxygluconokinase (EC 2.7.1.92); possible 5-dehydro-2-deoxyphosphogluconate aldolase DUF2090 (EC 4.1.2.29)	MGQTRFASGRQLDVICLGRLGVDLYAQQVGARLEDVASFAKYLGGSSANIAFGTARLGLRSAMLSRVGDDHMGRFLVESLAREGCDVSGIKVDPERLTAMVLLGIKDRETFPLVFYRENCADMALRVEDIDETFIASSKALLITGTHFSTDGVYKASTQALDYAEKHNVKCVLDIDYRPVLWGLAGKADGETRFVADQKVSQHVQGILPRFDLIVGTEEEFLIAGGSEDLLSALRTVRSLTAATLVVKLGAQGCTVIHGAIPARLEDGALYPGVRVEVLNVLGAGDAFMSGFLAGWLEDASDERCCQLANACGGLVVSRHACAPAMPTRAELDYLFKSPVPITRPDQDAVLQRLHQVSVPRKTWKQLFIFAFDHRWQLVELAQKGGRDLNCIGDLKQLF…		NA				K03338	iolC; 5-dehydro-2-deoxygluconokinase [EC:2.7.1.92]	No		GCF_001623525.1:WP_063320675.1	5-dehydro-2-deoxygluconokinase [Pseudomonas]	No		EC:2.7.1.4	Low	No	fructokinase
pseudo6_N2E2	Gammaproteobacteria	Pseudomonas fluorescens FW300-N2E2	Pf6N2E2_5305		transporter	Fe(3+) dicitrate transport protein FecA	MPQQPTRLTPLARTVRQWLLGASLSFVALPCVQAADAKAYHIAPSSLENALNQFGREAGVLISFGSQTTAGLQSRGLEGSYSPEQGLSALLEGTGLQARPEGDNAFSLQPATTTALDIGTTTVVGDWLGDAAQANVFEHPGARDVIRRETFERQGATQARDVLNRIPGVNAPENNGTGSHDMALNFGIRGLNPRLASRSTVLMDGIPVPFAPYGQPQLSFAPVSMGNMDAVDVVRGGGAVRYGPQNVGGVVNFVTRAIPDAPTVKGGLQTETSPSSSHDGFKTSSNLLAGGTADNGLGGALLYSGTRGGDWREHSDTQIDDLILKGNYQLDEANSFNAMAQYYEGEADMPGGLNVADYNADPYQSTRPNDRFWGRRTLVNVGYRYQQDRREFTASTFFT…	sp|P13036|FECA_ECOLI	63.742	Fe(3+) dicitrate transport protein FecA OS=Escherichia coli (strain K12) OX=83333 GN=fecA PE=1 SV=2	Yes		K16091	fecA; Fe(3+) dicitrate transport protein	Yes		GCF_001623525.1:WP_063324451.1	TonB-dependent receptor family protein [Pseudomonas]	Vague
pseudo6_N2E2	Gammaproteobacteria	Pseudomonas fluorescens FW300-N2E2	Pf6N2E2_6061		enzyme	Methylisocitrate lyase (EC 4.1.3.30)	MSNSTPGQRFRDAVANEHPLQVVGTINANHALLAKRAGFKAIYLSGGGVAAGSLGVPDLGITGLDDVLTDVRRITDVCDLPLLVDVDTGFGSSAFNVARTVKSMIKFGAAAIHIEDQVGAKRCGHRPNKEIVSQQEMVDRIKAAVDARTDDSFVIMARTDALAVEGLESALDRAAACIEAGADMIFPEAITELEMYKLFASRVKAPILANITEFGATPLYTTEQLAGADVSLVLYPLSAFRAMNKAAENVYTAIRRDGTQQNVIDTMQTRMELYDRIDYHTFEQKLDALFAAKK	sp|Q937P0|PRPB_CUPNE	80.69	2-methylisocitrate lyase OS=Cupriavidus necator OX=106590 GN=prpB PE=1 SV=1	Yes		K03417	prpB; methylisocitrate lyase [EC:4.1.3.30]	Yes		GCF_001623525.1:WP_047228278.1	methylisocitrate lyase [Pseudomonas]	Yes		EC:4.1.3.30	High	Yes
psRCH2	Gammaproteobacteria	Pseudomonas stutzeri RCH2	GFF2012	Psest_2055	enzyme	cytochrome c550 (electron acceptor for quinoprotein ethanol dehydrogenase)	MNNKIFLRSLLAAGVLGMSGLVMAHGDVTPQAVNTKGLPALGEEWLEENPYRAPSEHHDLAVQIGSSAYNQNCARCHGLEAISGGIAPDLRELEASYDGDEWYKERVINGAVRDGAVYMPRMADTLSQEALWAIRTYIESEAAKQ	sp|Q9I2C5|CY550_PSEAE	71.429	Cytochrome c550 OS=Pseudomonas aeruginosa (strain ATCC 15692 / DSM 22644 / CIP 104116 / JCM 14847 / LMG 12228 / 1C / PRS 101 / PAO1) OX=208964 GN=exaB PE=1 SV=1	Yes				Vague		GCF_000327065.1:WP_015276878.1	cytochrome c-550 PedF [Pseudomonadaceae]	Yes
psRCH2	Gammaproteobacteria	Pseudomonas stutzeri RCH2	GFF204	Psest_0205	transporter	tricarboxylate porin	MLTAVRRSPAPARLALAVAAASLAPLAQAAFIEDSSATLQTQNIYLNRDFREGSGQSKREEWTQGFILDVQSGFTEGTVGVGLDALGMLGIKLDSGGGRTGTDLLPVHDDGSTPDEFSRLGLTAKAKIAETELRYGSHIPEMPVVKASDSRTLPQVFEGGTATSKDIEGLTLIGGRLDKVIDRASTNSQDLQLNNKNSRFAGAAEADHLTFAGAEYAFNKNLTGRYYYGELDDVYRQHFFGLLAVKPLTDNSALSADLRVMFSDDTGAANAGKIDNQAWNGMLGYSLGGHKVSLGYQQMRGDTGYAYIDGSDPFLVNFVQINDFANADERSWQARYDYNFAAMGIPGLTFLTRYVSGDNAEYNGGSNGSEWERDIELKYVVQSGPLKNVAVRMRNAMFR…	sp|Q88JX6|GALP_PSEPK	40.865	Porin-like protein GalP OS=Pseudomonas putida (strain ATCC 47054 / DSM 6125 / CFBP 8728 / NCIMB 11950 / KT2440) OX=160488 GN=galP PE=3 SV=1	No	Function: “possibly involved in the gallate degradation pathway”			Vague		GCF_000327065.1:WP_015275218.1	OprD family porin [Stutzerimonas stutzeri]	Vague
psRCH2	Gammaproteobacteria	Pseudomonas stutzeri RCH2	GFF1051	Psest_1084	enzyme	Isovaleryl-CoA dehydrogenase (EC 1.3.8.4)	MNYSSLNFALGETIDMLREQVQAFVAAEIAPRAEAIDQENLFPADMWRKFGEMGLLGVTVSEEYGGAGLGYLAHVVAMEEISRGSASVALSYGAHSNLCVNQINRNGNPEQKARYLPKLISGEHVGALAMSEPNAGSDVVSMKLRAEKRGDRYVLNGSKTWITNGPDANTYVIYAKTDLDKGAHGITAFIVERDWKGFSRGNKFDKLGMRGSNTCELFFDDVEVPQENVLGAENGGVKVLMSGLDYERVVLAGGPTGIMQSCLDVVVPYIHDRKQFGQSIGEFQFIQGKVADMYTQLNASRAYLYAVAQACDRGETTRKDAAGVILYTAENATQMALQAIQILGGNGYINEFPTGRLLRDAKLYEIGAGTSEIRRMLIGRELFNESR	sp|Q75IM9|IVD_ORYSJ	65.365	Isovaleryl-CoA dehydrogenase, mitochondrial OS=Oryza sativa subsp. japonica OX=39947 GN=Os05g0125500 PE=2 SV=2	Yes		K00253	IVD, ivd; isovaleryl-CoA dehydrogenase [EC:1.3.8.4]	Yes		GCF_000327065.1:WP_015275973.1	isovaleryl-CoA dehydrogenase [Stutzerimonas stutzeri]	Yes		EC:1.3.8.4 EC:1.3.8.8 EC:1.3.8.1 EC:1.3.8.7	Low	Close	Long-chain acyl CoA dehydrogenase (1.3.8.8) seems unlikely
psRCH2	Gammaproteobacteria	Pseudomonas stutzeri RCH2	GFF4196	Psest_4269	transporter	C4-dicarboxylate transporter, DctQ subunit	MNALWRVWDHFEEGFIAFLLAAMTLVTFVYVILNNLYTLFYNLGDRFEGSADFWFAIGDFIIGLAQAMTWSTALTKALFAWLIFSGLAYGVRTAGHIGVDALVKLAPRHIQRIIGIIACLLCLGYAGLLTVASFEWIQTLFIANIGAEDLGHIGVKQWHIGMIVPFGFAMVFIRFAEIFVRILRNEQTGLGLADEAADALKHGEEEPK	sp|Q9HU17|DCTQ_PSEAE	74.641	C4-dicarboxylate TRAP transporter small permease protein DctQ OS=Pseudomonas aeruginosa (strain ATCC 15692 / DSM 22644 / CIP 104116 / JCM 14847 / LMG 12228 / 1C / PRS 101 / PAO1) OX=208964 GN=dctQ PE=1 SV=1	Yes		K11689	dctQ; C4-dicarboxylate transporter, DctQ subunit	Yes		GCF_000327065.1:WP_015278892.1	TRAP transporter small permease [Pseudomonadaceae]	Vague
psRCH2	Gammaproteobacteria	Pseudomonas stutzeri RCH2	GFF561	Psest_0566	transporter	urea transporter (parabanic acid might be hydrolyzed before transport?)	MNTALHRLLLLLLLALPWAAQAGDAADYAKASPAKQARLLEDWAIAPVPERLPLIEALRANRVAIDQNKTPFVEDGDTYRALESDAEPVGTPKKLRLNNRLRGLLNTALASHQLFSEDPSQRLGAAKLLQRSGQPEQLPLLQQRLEAEDDPAAREALTLALANLQLTASDPAVRLAAVRLLGETGAPLARVRLENLLADEAETDAAVRKAAETSLAQVKRKLLIGELLGQAFSGLSLGSILLLAALGLAITFGLLGVINMAHGEMLMLGAYTTYMVQVLMARLAPEALAFYPLVALPVAFFVTAAIGMALERTVIRHLYGRPLETLLATWGISLILIQLVRVLFGAQNVEVANPAWLSGGLQVLPNLVLPYNRMVIIGFALFVVLLTWLLLNKTRLGLN…		NA				K11960	urtB; urea transport system permease protein	Yes		GCF_000327065.1:WP_015275556.1	urea ABC transporter permease subunit UrtB [Stutzerimonas stutzeri]	Yes
psRCH2	Gammaproteobacteria	Pseudomonas stutzeri RCH2	GFF2390	Psest_2438	enzyme	3-hydroxyisobutyrate dehydrogenase (EC 1.1.1.31)	MHIGFIGLGNMGAPMAHNLLKAGHQLSVFDLNAAAVENLVGAGALPVDSPTAIAQGNAELIITMLPAAAHVKGVYLGVNGLIAHSRAGVMLIDCSTIDPHSAREVAKAAAEHGNPMLDAPVSGGTGGAAAGTLTFMVGGSDPDFDHAQPILAAMGKNIVHCGAAGNGQVAKVANNMLLGISMIGVAEAMALGVALGMDAKTLAGVINTSSGRCWSSDTYNPFPGVLDNVPSSRGYSGGFGSDLMLKDLGLATEAAKQVRQPVILGALAQQLYQSFSAQGHGGLDFSAIINQYRKDT	sp|Q54CX6|3HIDH_DICDI	58.02	Probable 3-hydroxyisobutyrate dehydrogenase, mitochondrial OS=Dictyostelium discoideum OX=44689 GN=hibA PE=3 SV=1	Yes		K00020	HIBADH, mmsB; 3-hydroxyisobutyrate dehydrogenase [EC:1.1.1.31]	Yes		GCF_000327065.1:WP_015277222.1	3-hydroxyisobutyrate dehydrogenase [Stutzerimonas stutzeri]	Yes		EC:1.1.1.31 EC:1.1.1.387	High	Yes	L-serine 3-dehydrogenase (NAD(+)) seems unlikely
psRCH2	Gammaproteobacteria	Pseudomonas stutzeri RCH2	GFF3724	Psest_3793	enzyme	D-alanine dehydrogenase (EC 1.4.99.-)	MRVLVLGSGVVGTASAYYLARAGFEVVVVDRQPAVAMETSFANAGQVSPGYASPWAAPGVPLKAMKWLLQRHAPLAIKLTGDVDQYLWMAQMLRNCTAARYAVNKERMVRLSEYSRDCLDELRAETGIAYEGRQLGTTQLFRTQAQLDAAAKDIAVLERSGVPYELLDRAAIGRVEPALAKVAHKLSGALRLPNDQTGDCQMFTSRLAEMALALGVEFRFGQNIQRLEHAGDRIAGVWIDGKLETADRYVLALGSYSPQMLKPLGIRAPVYPLKGYSLTVPISDPAMAPQSTVLDETYKVAITRFDQRIRVGGMAEIAGHDLSLNPRRRETLEMVVGDLYPQGGDPAEAVFWTGLRPATPDGTPIIGATAYRNLYLNTGHGTLGWTMACGSGRVLADLL…	sp|A4VGT8|DADA_STUS1	96.296	D-amino acid dehydrogenase OS=Stutzerimonas stutzeri (strain A1501) OX=379731 GN=dadA PE=3 SV=1	Yes		K00285	dadA; D-amino-acid dehydrogenase [EC:1.4.5.1]	Yes		GCF_000327065.1:WP_015278451.1	D-amino acid dehydrogenase [Pseudomonadaceae]	Yes		EC:1.4.5.1	Low	Close	D-amino acid dehydrogenase (quinone)
psRCH2	Gammaproteobacteria	Pseudomonas stutzeri RCH2	GFF760	Psest_0774	transporter	cytosine permease	MKQPVDTDYPLSEVPAGARKGLWSTSILLFGFTFFTATMFAGGKIGLAFDFKTMLWAAVIGNLLLGLYAAALGLIACRSGLNSVLMGRFCFGEAGSRLSDFLLGFTQIGWYAWGTATIAIVLVRLLALPESWTMPLMVLFGFGFCLTAFVGYKGLDLLSRIAVPAMLILLIASLWTATRDIGGLDGLLAVQPGDSLTLGMAITMIFGTFVSGATQATNWTRFARSSKVAVWASLIGFFIGNGLMIVAGAYGAIVYQQPDIVEVLVLQGLSMAAVVMLFLNLWTTQDNTIYNFAAAGCNLLRTERRRLVTLGGAFVGTLLALGGMYELLIPFLILLGSIIPPIGGVIMADYFYRHRGHYPKLAEARLPKYNSLGLAAYVLGAACAYFSPWVAPIVGILVA…	sp|P0AA83|CODB_ECOL6	37.157	Cytosine permease OS=Escherichia coli O6:H1 (strain CFT073 / ATCC 700928 / UPEC) OX=199310 GN=codB PE=3 SV=1	Yes		K10974	codB; cytosine permease	Yes		GCF_000327065.1:WP_015275714.1	cytosine permease [Stutzerimonas stutzeri]	Yes
psRCH2	Gammaproteobacteria	Pseudomonas stutzeri RCH2	GFF85	Psest_0085	transporter	alpha-ketoglutarate TRAP transporter, solute receptor component	MRLTKRLGLLAAAAAFTASTAAVAAPTFINILTGGTSGVYYPIGVALSQQYNKIDGAKTSVQATKASVENLNLLQAGRGELAFSLGDSVEDAWNGVEDAGFKAPLKRLRAIAGTYNNYIQIVASAESGIKTLDDLKGKRISVGAPKSGTELNARAIFKAAGLDYKDMGRVEFLPYAESVELIKNRQLDATLQSSGLGMAAIRDLASTMPVTFVEIPAEVVEKIESDAYLAGVIPAGTYDGQDADVPTVAITNILVTHEKVSDEVAYQMTKLMFDNLAALGNAHSAAKDIKLENATKNLPIPLHPGAERFYKEAGVLK	sp|P0A3T3|BCSP_BRUAB	39.228	31 kDa immunogenic protein OS=Brucella abortus biovar 1 (strain 9-941) OX=262698 GN=bcsP31 PE=4 SV=1	Vague	The other hit has the same annotation	K07080	K07080; uncharacterized protein	Vague		GCF_000327065.1:WP_015275112.1	TAXI family TRAP transporter solute-binding subunit [Pseudomonadaceae]	Vague
Putida	Gammaproteobacteria	Pseudomonas putida KT2440	PP_0294	PP_0294	transporter	transport of carnitine & choline (and probably betaine as well), ATPase component	MSIIRFEDVDVIFSNKPREALALLDQGQTREQILKQTGLVVGVEKANLDINKGEICVLMGLSGSGKSSLLRCINGLNTVSRGKLFVEHEGKHIDIANCSAAELKMMRTKRIAMVFQKFALMPWLTVRENISFGLEMQGRPEKERRKLVDEKLELVGLTQWRNKKPDELSGGMQQRVGLARALAMDADILLMDEPFSALDPLIRQGLQDELLGLQAKLSKTIVFVSHDLDEALKLGTRIAIMKDGRIIQYSKPEEIVLNPADEYVRTFVAHTNPLNVLCGRSLMRSLDNCKRVNGSVCLDPGIDSWLDLGEGGALKRARQGQNGLDMQKWAPGQDVELLERRPTVVHADIGMREALQIRYQTGNKLVLQDNDRVVGILGDTELYHALLGKNHG	sp|P14175|PROV_ECOLI	50.859	Glycine betaine/proline betaine transport system ATP-binding protein ProV OS=Escherichia coli (strain K12) OX=83333 GN=proV PE=1 SV=1	Close		K02000	proV; glycine betaine/proline transport system ATP-binding protein [EC:7.6.2.9]	Close		GCF_000007565.2:WP_010951660.1	choline ABC transporter ATP-binding protein [Pseudomonas]	Close
Putida	Gammaproteobacteria	Pseudomonas putida KT2440	PP_0302	PP_0302	enzyme	L-carnitine dehydrogenase [EC: 1.1.1.108]	MPFITEIKTFAALGSGVIGSGWVARALAHGLDVVAWDPAPGAEQALRKRVANAWPALEKQGLAPGASQDRLKFVATIEECVRNADFIQESAPERLDLKLDLHAKISAAAKPDAIIGSSTSGLLPSEFYESSTHPERCVVGHPFNPVYLLPLVEIVGGSRTSPEAIEAAKTIYTALGMRPLHVRKEVPGFIADRLLEALWREALHLVNDGVATTGEIDDAIRFGAGLRWSFMGTFLTYTLAGGDAGMRHFMSQFGPALKLPWTYLPAPELTDKLIDDVVSGTSEQQGERSIAALERYRDDTLLAVLEAVKSSKASHGLSFSD	sp|Q88R32|LCDH_PSEPK	100	L-carnitine dehydrogenase OS=Pseudomonas putida (strain ATCC 47054 / DSM 6125 / CFBP 8728 / NCIMB 11950 / KT2440) OX=160488 GN=lcdH PE=3 SV=1	Yes		K17735	lcdH, cdhA; carnitine 3-dehydrogenase [EC:1.1.1.108]	Yes		GCF_000007565.2:WP_010951667.1	L-carnitine dehydrogenase [Pseudomonas]	Yes
Putida	Gammaproteobacteria	Pseudomonas putida KT2440	PP_1170	PP_1170	enzyme	D-glucaro-1,5-lactonase UxuL	MNCELIVDARNGTGESPVWHPGEQALYWVDIPARQLHRWQAADGKHQCWQGDEMLACIARSGQGWVAGMESGIFQLQAKADGSLDSRLLSNVQHAQAGMRFNDGRCDRQGRFWAGTMLLDMQQGAHVGALYRHDGEGHLHLQQDGMIVPNGLAFSPDGKRMYLSDSHPNVQKVWAFDYDTDSGTPHGKHLFVDMRNYPGRPDGAAIDQDGCYWICGNDAGQIHRFTPEGRLDRSLSVPVKKPAMCAFGGASLDILYVTSIRPTGIDLSDQPLAGGVFALDPGTKGLEEPAYRG	sp|P0DOV6|SGL_PSEPU	39.322	6-deoxy-6-sulfogluconolactonase OS=Pseudomonas putida OX=303 GN=PpSQ1_00410 PE=1 SV=1	No				Vague		GCF_000007565.2:WP_010952324.1	SMP-30/gluconolactonase/LRE family protein [Pseudomonas]	Vague		EC:3.1.1.99	High	No	6-deoxy-6-sulfogluconolactonase
Putida	Gammaproteobacteria	Pseudomonas putida KT2440	PP_2448	PP_2448	enzyme	Gamma-glutamylputrescine oxidase	MANTPYPQSYYAASANPVPPRPALQGEVETDVCIIGAGYTGLSSALFLLENGFKVSIVEAAKVGFGASGRNGGQIVNSYSRDIDVIERTVGPKQAQLLGHMAFEGGRIIRERVAKYNIQCDLKDGGVFAALTSKQMGHLESQKRLWERFGHNQLELMDQKRIREVVACDSYIGGMLDMSGGHIHPLNLALGEAAAVESLGGIIYEQTPAVRIERGANPVVHTPQGKVRAKFIIVAGNAYLGNLVPELAAKSMPCGTQVITTEPLGEELARTLLPQDYCVEDCNYLLDYYRLTSDKRLIFGGGVVYGARDPANIEAIIRPKMLKAFPQLKNVKIDYAWTGNFLLTLSRLPQVGRIGDNIYYSQGCSGHGVTYTHLAGKVLAEALRGQAERFDAFAGLPHY…	sp|P37906|PUUB_ECOLI	65.094	Gamma-glutamylputrescine oxidoreductase OS=Escherichia coli (strain K12) OX=83333 GN=puuB PE=1 SV=2	Yes		K09471	puuB, ordL; gamma-glutamylputrescine oxidase [EC:1.4.3.-]	Yes		GCF_000007565.2:WP_003250557.1	FAD-binding oxidoreductase [Pseudomonas]	Vague		EC:2.1.1.303	Low	No	neocarzinostatin O-methyltransferase
Putida	Gammaproteobacteria	Pseudomonas putida KT2440	PP_2791	PP_2791	enzyme	4-hydroxypentanoyl-CoA kinase, subunit LvaA	MKSWPRPCSWACANPETKGRAYRTMSSSPTISPASDTFAAMTDDHRLAEFIREQASATRVVIQARKRLSGGAIQENWLLDLLIEGGPWAGVRRWVLRSDALSALPASLDREQEFAVLQVVYQAGVKVPRPLWLCRDVRVHGRVFFLMEYVPGSAAGRALSTGAGPQGRAQLATQLGANLARLHQVRPPCATLCFLSVPDSSPALATIDAYRRYLDTLADAYPVLEWGLRWCELHAPRSSTLCLLHRDYRTGNYLASEEGLEAVLDWEFTGWGDPCEDLGWFTARCWRFTRPDLEAGGIGQLEDFLRGYHEVSSLCIERSRLHYWQVMATLRWAVIALQQGQRHLSGEEPSLELALTARLLPELELDILHMTGAEAP		NA						Vague		GCF_000007565.2:WP_049586209.1	phosphotransferase family protein [Pseudomonas]	Vague		EC:7.6.2.14 EC:6.3.2.17 EC:5.4.99.8	Low	No	(none are close)
Putida	Gammaproteobacteria	Pseudomonas putida KT2440	PP_3492	PP_3492	enzyme	isobutyryl-CoA dehydrogenase (EC 1.3.8.5) (modest phenotype, but conserved, and some homologs have a much stronger phenotype)	MQDLELSEEQIMIRDMARDFARGEIAPHAQAWEKAGWIDDGVVRKMGELGLLGMVVPEDFGGSYTDYVAYALAVEEISAGCGATGAMMSIHNSVGCGPLLAYGTAEQQQQWLPRLASGEVIGCFCLTEPQAGSEAHNLRTRAELVDGQWVINGAKQFVSNARRAGLAIVFAVTDPELGKKGLSAFLVPTDNPGFKVDRSEHKMGIRASDTCAVTFDNCRIPAANILGERGKGLAIALSNLEGGRIGIAAQALGIARAAFEAALVYSRDRIQFGKPINEHQSIANLLADMQVQVNAARLLILHAARLRSAGKPCLSEASQAKLFASEMAERVCSMAIQVHGGYGYLEDYPVERYYRDARITQIYEGSSEIQRMLIARELKNYPL	sp|P45857|ACDB_BACSU	49.067	Acyl-CoA dehydrogenase OS=Bacillus subtilis (strain 168) OX=224308 GN=mmgC PE=1 SV=3	Close	Although this gene has a mild phenotype, some homologs have strong phenotypes, and they are all specific to valine; furthermore, it is in an operon with a gene with a conserved specific phenotype on valine (PP_3491)			Vague		GCF_000007565.2:WP_010954355.1	acyl-CoA dehydrogenase family protein [Pseudomonas]	Vague		EC:1.3.1.95	Medium	No	acryloyl-CoA reductase (NADH)
Putida	Gammaproteobacteria	Pseudomonas putida KT2440	PP_3713	PP_3713	enzyme	Catechol 1,2-dioxygenase (EC 1.13.11.1)	MTVKISHTADIQAFFNRVAGLDHAEGNPRFKQIILRVLQDTARLIEDLEITEDEFWHAVDYLNRLGGRNEAGLLAAGLGIEHFLDLLQDAKDAEAGLGGGTPRTIEGPLYVAGAPLAQGEARMDDGTDPGVVMFLQGQVFDADGKPLAGATVDLWHANTQGTYSYFDSTQSEFNLRRRIITDAEGRYRARSIVPSGYGCDPQGPTQECLDLLGRHGQRPAHVHFFISAPGHRHLTTQINFAGDKYLWDDFAYATRDGLIGELRFVEDAAAARDRGVQGERFAELSFDFRLQGAKSPDAEARSHRPRALQEG	sp|P07773|CATA_ACIAD	58.703	Catechol 1,2-dioxygenase OS=Acinetobacter baylyi (strain ATCC 33305 / BD413 / ADP1) OX=62977 GN=catA PE=1 SV=1	Yes		K03381	catA; catechol 1,2-dioxygenase [EC:1.13.11.1]	Yes		GCF_000007565.2:WP_010954549.1	catechol 1,2-dioxygenase [Pseudomonas]	Yes		EC:1.13.11.1	High	Yes
Putida	Gammaproteobacteria	Pseudomonas putida KT2440	PP_3721	PP_3721	enzyme	arginine:pyruvate transaminase [EC: 2.6.1.84]	MRYAKLTQRIAGDGAAAWDIHYRALALQAEDKDILLLSVGDPDFDTPAPIVEAAIDSLRAGHTHYADVRGKLALRQAIANRHRQRSGQAVSADQVTVLAGAQCALYCVAQCILDPGDEVIVAEPMYVTYEAVFGACGAKVVPVPVKPENGFRVCPRDVAERITPRTRALALNSPHNPSGASLPRATWEALAELCVAHDLWLISDEVYSELLYEGEHVSPGSLPGMAERTATLNSLSKSHAMTGWRMGWVVGSTALATHLENLALCMLYGLPDFVQDAAVVALEHPLPELDAMREAYRQRRDLVCEQLAGCPGLKALKPDGGMFVMLDIRETGVSAQAFADYLLDSQGVSVLAGEAFGPSAAGHIRLGLVLGNEALVDACQRIARCAGELMRGQTDA	sp|Q9HUI9|ARUH_PSEAE	81.026	Arginine--pyruvate transaminase AruH OS=Pseudomonas aeruginosa (strain ATCC 15692 / DSM 22644 / CIP 104116 / JCM 14847 / LMG 12228 / 1C / PRS 101 / PAO1) OX=208964 GN=aruH PE=1 SV=1	Yes		K12252	aruH; arginine:pyruvate transaminase [EC:2.6.1.84]	Yes		GCF_000007565.2:WP_010954557.1	pyridoxal phosphate-dependent aminotransferase [Pseudomonas]	Vague		EC:2.6.1.84	High	Yes
Putida	Gammaproteobacteria	Pseudomonas putida KT2440	PP_3948	PP_3948	enzyme	nicotinate dehydrogenase subunit B (also known as nicotinate hydroxylase)	MNHSQQVPSRDQLLAKTGVLLIVDQITPPSGPVAKGVTPTVKERELALFIAVSDDGMVYAFNGHVDLGTGIRTSLAQIVAEELDLRMDQVHMVLGDTERAPNQGATIASATLQISAVPLRKAAATARRYLLQQAALRLGCPPEMLRIEDGTVIASNGSTLSFAELVQGKNHQLHIADDAPLKAIEDYRLVGRSAPRVDIPGKATGELTYVHDMRLPNMLHGRVIRPPYAGHDSGDFVGNSLLAVDESSIAHLPGVVAVVVIRDFVGVVAEREEQAIRAAHELKVSWKPFTGKLPDLSDVAQAIRDNPRVQRTVLDQGDVDGGIANASQRLSRSYLWPYQLHASIGPSCALADFTAGQIRVWSGTQNPHLLRADLAWLLACDEARIEIIRMEAAGCYGRN…	sp|Q88FX8|NICB_PSEPK	100	Nicotinate dehydrogenase subunit B OS=Pseudomonas putida (strain ATCC 47054 / DSM 6125 / CFBP 8728 / NCIMB 11950 / KT2440) OX=160488 GN=nicB PE=1 SV=1	Yes		K18030	nicB; nicotinate dehydrogenase subunit B [EC:1.17.2.1]	Yes		GCF_000007565.2:WP_010954765.1	molybdopterin cofactor-binding domain-containing protein [Pseudomonas]	Vague		EC:1.2.99.6	Low	No	carboxylate reductase
Putida	Gammaproteobacteria	Pseudomonas putida KT2440	PP_4038	PP_4038	enzyme	Dihydropyrimidine dehydrogenase (NADP(+)) (EC 1.3.1.2); phenotype on 3-aminobutyrate is not explained	MADLSIVFAGIKAPNPFWLASAPPTDKAYNVVRAFEAGWGGVVWKTLGEDPAAVNVSSRYSAHYGPNRQVQGINNIELITDRSLEINLREITQVKKDWPDRALIVSLMVPCIEESWKFILPLVEATGADGIELNFGCPHGMPERGMGAAVGQVPEYVEMVTRWCKTYCALPVIVKLTPNITDIRQSARAAHRGGADAVSLINTINSITSVDLDRMVAHPIVGDQSTHGGYCGSAVKPIALNMVAEIARDPETRGLPICGIGGIGNWRDAAEFMALGSGAVQVCTAAMLHGFRIVEDMQDGLARWMDQHGHATVEAFRGQAVGHTTDWKYLDINYKSVAHIDQEACIGCGRCHIACEDTSHQAIASTLKADGTHAYSVIEEECVGCNLCQITCPVENCIE…	sp|Q8ZNL7|PREA_SALTY	43.719	NAD-dependent dihydropyrimidine dehydrogenase subunit PreA OS=Salmonella typhimurium (strain LT2 / SGSC1412 / ATCC 700720) OX=99287 GN=preA PE=3 SV=1	Close	NADP vs. NAD, see above	K17723	preA; dihydropyrimidine dehydrogenase (NAD+) subunit PreA [EC:1.3.1.1]	Yes		GCF_000007565.2:WP_010954835.1	NAD-dependent dihydropyrimidine dehydrogenase subunit PreA [Pseudomonas]	Close		EC:1.3.1.1	Low	Close	NAD vs. NADP
PV4	Gammaproteobacteria	Shewanella loihica PV-4	5208605	Shew_1116	enzyme	N-acetylglucosamine kinase (EC 2.7.1.59)	MGFNQTEEQALVIGIDGGGSKCRATIYAADDSVLGTGVAGRANPLYGLTHTFDSISRATELALQDAGLKAGDGKTMVAGVGLAGVNVAHLYQAIKAWQHPFAEMYVTTDLHTACIGAHKGGDGAVIITGTGSCGYAHVGEQSLSLGGHGFALGDKGSGAWLGLQAAQQVLLDLDGFGPATQLTERLLEHFKVNDAMGIVEHLAGKSSGCYATLARTVLSCAQAQDEVAKAIVVEGAEYISALAHKLFEIHPPRFSMIGGLAEPLAPWLDKRVVDKISPILAPPELGAAYFARQQLGFSS	sp|Q9KUA9|GSPK_VIBCH	34.276	Glucosamine kinase GspK OS=Vibrio cholerae serotype O1 (strain ATCC 39315 / El Tor Inaba N16961) OX=243277 GN=gspK PE=1 SV=2	No	Function: “ Does not show kinase activity with any other sugar.”	K18676	gspK; glucosamine kinase [EC:2.7.1.8]	No		GCF_000016065.1:WP_011864920.1	BadF/BadG/BcrA/BcrD ATPase family protein [Shewanella loihica]	Vague		EC:2.7.1.8	Low	No	glucosamine kinase
PV4	Gammaproteobacteria	Shewanella loihica PV-4	5209912	Shew_2360	enzyme	D-hydroxyproline dehydrogenase (a major component of gelatin)	MIEANHMTKHELTGQDKGSQTCAASTQNADVTVIGAGVVGLANAIALQQAGFSVRVIDKQGVAAGASFGNAGHFATEQMFPLADPAMLFKLPGMLLDPLGPFRIQPRYFLKALPWFMRFLVNMLPARRAHNSAAIKALNQKSIQAWQQLVSECGCSELLKLEGSLLVFEQTPFIEVERVYKSYRDAGVAVKLLSGEEVRTLEPDLSPNINHGLWFTQVGHTPDPAELCHRLATQFEKLGGELVIAEVIQLAAECKGDNKEKGVNVSVASGVTYQSDKLLLSAGAWSKPLAQQLGFKVPLETERGYHLMMPQQSRLQRPVASFERKFIITPMNRGTCLAGTVEFGGLKAPLIEARADCLLPHAKALLPDVLASAKTSQGERWMGFRPSLPDSLPVLGASP…	sp|Q8DF11|DADA_VIBVU	27.873	D-amino acid dehydrogenase OS=Vibrio vulnificus (strain CMCP6) OX=216895 GN=dadA PE=3 SV=1	Close	operon seems to be specific for D-hydroxyproline, i.e. adjacent to a trans-3-hydroxy-L-proline dehydratase (Shew_2361); so we expect that this enzyme is specific	K21060	lhpB; D-hydroxyproline dehydrogenase [EC:1.5.99.-]	Yes		GCF_000016065.1:WP_049766579.1	FAD-dependent oxidoreductase [Shewanella loihica]	Vague		EC:1.4.5.1	Low	No	D-amino acid dehydrogenase (quinone) -- D-amino acid is close enough, but why quinone? There's no membrane component? (There's an adjacent 'proline racemase' with a potential TM helix, but not that cofit.)
SB2B	Gammaproteobacteria	Shewanella amazonensis SB2B	6938573	Sama_2676	enzyme	L-glutamate gamma-semialdehyde dehydrogenase (EC 1.2.1.88); Proline dehydrogenase (EC 1.5.5.2)	MFKASEVLAGRYDNANLDELFSLISQNYIVDEEAYLKELIALVPSSDEEIARITSRAHDLVAKVRQYEKKGLMVGIDAFLQQYSLETQEGIILMCLAEALLRIPDAETADALIADKLSGAKWDEHMSKSDSVLVNASTWGLMLTGKIVQLDKNLDGTPSNLLSRLVNRLGEPVIRQAMYAAMKIMGKQFVLGRTIEEGLKNAAEKRKLGYTHSYDMLGEAALTMKDADKYYRDYANAIQALGTAKFDESEAPRPTISIKLSALHPRYEVANEDRVMTELYATLIKLIEQARSLNVGIQIDAEEVDRLELSLKLFKKLYQSDAAKGWGLLGIVVQAYSKRALPVLMWLTRLAKEQGDEIPLRLVKGAYWDSELKWAQQAGEAGYPLFTRKAATDVSYLAC…	sp|O52485|PUTA_KLEAE	48.904	Bifunctional protein PutA OS=Klebsiella aerogenes OX=548 GN=putA PE=3 SV=1	Yes		K13821	putA; RHH-type transcriptional regulator, proline utilization regulon repressor / proline dehydrogenase / delta 1-pyrroline-5-carboxylate dehydrogenase [EC:1.5.5.2 1.2.1.88]	Yes		GCF_000015245.1:WP_011760784.1	bifunctional proline dehydrogenase/L-glutamate gamma-semialdehyde dehydrogenase PutA [Shewanella amazonensis]	Yes		EC:1.2.1.88	Low	No	Missing the proline dehydrogenase
SB2B	Gammaproteobacteria	Shewanella amazonensis SB2B	6938906	Sama_3009	enzyme	Succinylglutamic semialdehyde dehydrogenase (EC 1.2.1.71)	MTQFINGQWLAGEGKEMQSKNPANGEVIWQGKAAVPAQVQAAVMAARDAQFEWFMLGFEGRQAIVEAYRNELEANKAELAEVIAQETGKPRWETATEAAAMIGKIGLSVSAYHKRTGTEVNEGAAGRAVLRHKPHGVVAVFGPYNFPGHLPNGHIVPALLAGNTVVFKPSELTPKVAELMLKLWEKAGLPAGVINLVQGEVETGKALASHPQLDGLFFTGSSRTGHLLHQQYAGHPGKILALEMGGNNPLIVKGVSDTRAAIHDIIQSAFISSGQRCTCARRLYVEKGAEGDKLLAGLVEAVKAIKVGPWNADPQPFMGSMISETAAKGMLDAQRNLLNLGAKSLVEMTHLQAGTGLVSPGLIDVTEVIELPDEEYFGPLLQVVRYTSFDEAIRLANDT…	sp|B0TU38|ASTD_SHEHH	85.597	N-succinylglutamate 5-semialdehyde dehydrogenase OS=Shewanella halifaxensis (strain HAW-EB4) OX=458817 GN=astD PE=3 SV=1	Yes		K06447	astD; succinylglutamic semialdehyde dehydrogenase [EC:1.2.1.71]	Yes		GCF_000015245.1:WP_011761116.1	succinylglutamate-semialdehyde dehydrogenase [Shewanella amazonensis]	Yes		EC:1.2.1.71	High	Yes
Smeli	Alphaproteobacteria	Sinorhizobium meliloti 1021	SM_b20197	SM_b20197	enzyme	ribulose-1,5-bisphosphate carboxylase small subunit (proline is oxidized to release CO2 and the CO2 is fixed)	MRITQGCFSFLPDLTDEQITAQVQYCLGKGWAIGVEYTDDPHPRNTYWEMWGNPMFDLKDAKGVMMELEDCRKAHPQDYIRLNAFDSSRGLETVTMSFIVNRPENEPSLRMTRTESNGRSQHYMWETQR	sp|P58349|RBS_RHIME	100	Ribulose bisphosphate carboxylase small subunit OS=Rhizobium meliloti (strain 1021) OX=266834 GN=cbbS PE=3 SV=1	Yes		K01602	rbcS, cbbS; ribulose-bisphosphate carboxylase small chain [EC:4.1.1.39]	Yes		GCF_000006965.1:WP_010975099.1	ribulose bisphosphate carboxylase small subunit [Sinorhizobium meliloti]	Yes		EC:4.2.1.133	Low	No	copal-8-ol diphosphate hydratase
Smeli	Alphaproteobacteria	Sinorhizobium meliloti 1021	SM_b20894	SM_b20894	transporter	L-arabinose ABC transporter, ATPase component; by similarity to Agrobacterium, also probably transporters xylose, galactose, glucose, fucose	MKCGALRRRFRASRPWTMSRSRSAKARSTRLSGKTAPAKSTLMKVLSGVYPAGTYEGEIHYDGELRQFSTISDSEELGIIIIHQELALVPLLSIAENIFLGNEVAEKGVIHWPQTFARTQELLKKVGLNESPATLITDIGVGKQQLVEIAKALSKKVRLLILDEPTASLNENDSDALLKLLMEFRSQGMTSIIISHKLNEIKKVADQITILRDGGTVETLDCHKEDISEDRIINGMVGRAMEDRYPPREPKIGDTLLEVKNWNVYHQHHRDRQFLHDVSFKVRAGEVVGIAGLMGAGRTETAMSVFGKSWGHKITGEVTMHGRPVDVSTIPKAIKAGLAYVTEDRKQLGLVLINNIMHNTTLANLHAVASNGVIDERKERKVAAEYRSKLRIRSHSIYQ…	sp|Q9K7C3|ARAG_HALH5	62.368	L-arabinose transport ATP-binding protein AraG OS=Halalkalibacterium halodurans (strain ATCC BAA-125 / DSM 18197 / FERM 7344 / JCM 9153 / C-125) OX=272558 GN=araG PE=3 SV=1	Yes		K10548	gguA; putative multiple sugar transport system ATP-binding protein [EC:7.5.2.-]	Vague		WP_003535529.1	multiple monosaccharide ABC transporter ATP-binding	Yes
Smeli	Alphaproteobacteria	Sinorhizobium meliloti 1021	SM_b20986	SM_b20986	enzyme	Nitrate reductase (EC 1.7.99.4)	MAQEVKTTCPYCGVGCGVIARVGDDGAVSVKGDPEHPANFGRLCSKGSALAETLDLDGRLLHPEIGGRRAGWSEALDLVAERFSRSIAEHGPDSVAFYVSGQLLTEDYYIANKLMKGFIGSANIDTNSRLCMSSSVAGHRRAFGSDTVPGAYEDLELAELVVLTGSNLAWCHPVLYQRLSAAKANRPEMKIVVIDPRRTMTADIADMHLAIAPDGDVALFNGLLAHLAASGAVDRNYISNYTSGFDEAVAAASRLDLPALSTATGLTVAQLRAFFRLFETTEKVVTCYSQGVNQSAAGTDKVNAIINCHLATGRIGRPGMGPFSLTGQPNAMGGREVGGLANMLAAHMDIEKSLHRDQVRRFWGAPSVASKPGLKAVDMFRAVADGRIKALWIMATNPV…	sp|Q06457|NASA_KLEOX	50.114	Nitrate reductase OS=Klebsiella oxytoca OX=571 GN=nasA PE=2 SV=2	Yes		K00372	nasC, nasA; assimilatory nitrate reductase catalytic subunit [EC:1.7.99.-]	Yes		GCF_000006965.1:WP_010975944.1	nitrate reductase [Sinorhizobium meliloti]	Yes		EC:1.7.5.1	Low	Yes	nitrate reductase (quinone)
Smeli	Alphaproteobacteria	Sinorhizobium meliloti 1021	SM_b21105	SM_b21105	transporter	ABC transporter for L-Fucose, permease component 2	MDTNASHRLRRRLLKVAHLAGLFLAMLVICLPGLWIVLSSLRPTVEIMAKPPVWIPETLSLDAYRAMFSGAGQGGVPVWDYFRNSLIVSVTSTVIALAIGLSGGYAFARYRFKAKSAIFLGFMLTRAVPGIALSLPLFMLYARTGIIDTHFSLILTYVALNVPFTIWLIDGFFRQVPKDLAEAAQIDGCTPWQAFWQVEFPLAGPGIASAGIFAFLTSWNEYALASQITRSVNSKTLPVGLLDYTAEFTIDWRGMCALAVVMIVPALTLTFIIQKHLVSGLTFGAVKG	sp|Q9K489|DASC_STRCO	35	Diacetylchitobiose uptake system permease protein DasC OS=Streptomyces coelicolor (strain ATCC BAA-471 / A3(2) / M145) OX=100226 GN=dasC PE=1 SV=1	No		K02026	ABC.MS.P1; multiple sugar transport system permease protein	Vague		GCF_000006965.1:WP_003534640.1	carbohydrate ABC transporter permease [Sinorhizobium meliloti]	Vague
Smeli	Alphaproteobacteria	Sinorhizobium meliloti 1021	SM_b21124	SM_b21124	enzyme	3-methylcrotonyl-CoA carboxylase, alpha (biotin-containing) subunit (EC 6.4.1.4)	MFSKLLIANRGEIACRIIRTARRLGIRTVAVYSDADGDALHVALADEAIRIGGAPAAESYLASAPIVQAARSVGAQAIHPGYGFLSENADFAEAVAEAGMIFVGPPPAAIRAMGLKDAAKALMERSGVPVVPGYHGEEQDASFLADRAREIGYPVLIKARAGGGGKGMRRVERQEDFGPALEAARREAESAFGDGSVLLERYLTKPRHIEMQVFGDRHGNIVHLFERDCSLQRRHQKVIEEAPAPGMTAEVRRAMGDAAVRAAQAIGYVGAGTVEFIADVTNGLWPDHFYFMEMNTRLQVEHPVTEAITGIDLVEWQLRVASGEPLPKKQADISMNGWAFEARLYAEDPARGFLPATGRLTELSFPEGTSRVDSGVRQGDTITPYYDPLIAKLIVHGQN…	sp|Q96RQ3|MCCA_HUMAN	46.815	Methylcrotonoyl-CoA carboxylase subunit alpha, mitochondrial OS=Homo sapiens OX=9606 GN=MCCC1 PE=1 SV=3	Yes		K01968	MCCC1, accA1; 3-methylcrotonyl-CoA carboxylase alpha subunit [EC:6.4.1.4]	Yes		GCF_000006965.1:WP_010975574.1	acetyl/propionyl/methylcrotonyl-CoA carboxylase subunit alpha [Sinorhizobium meliloti]	Vague		EC:6.3.4.14	High	Yes	(protein-ligated) biotin carboxylase is a sub-reaction of 3-methylcrotonyl-CoA carboxylase and is probably the role of this subunit
Smeli	Alphaproteobacteria	Sinorhizobium meliloti 1021	SM_b21125	SM_b21125	enzyme	Hydroxymethylglutaryl-CoA lyase (EC 4.1.3.4)	MTSPAKERVTIVEVAPRDGLQNESRLVATEDKIRLVDLLADCGYERIEVTSFVSPRWVPQLADAPAVMAGIVRRPGTRYAALTPNMRGFEAALAAGADEVAIFASASESFSERNINCSIAESIERFRPVAEASRHRGVPLRGYVSCVVECPYEGAIVPAETARVARLLADLGCYEISLGDTIGRGTPEAVDAMLAAALREIDAPKLAGHFHDTSGRALENIAVALERGIRVFDASAGGLGGCPYAPGAAGNVDTLAVNAFLEAQSFATGLDSEKLDRAAAFARSLRSTA	sp|P35915|HMGCL_CHICK	56	Hydroxymethylglutaryl-CoA lyase, mitochondrial OS=Gallus gallus OX=9031 GN=HMGCL PE=1 SV=1	Yes		K01640	HMGCL, hmgL; hydroxymethylglutaryl-CoA lyase [EC:4.1.3.4]	Yes		GCF_000006965.1:WP_010975575.1	hydroxymethylglutaryl-CoA lyase [Sinorhizobium meliloti]	Yes		EC:4.1.3.26	Medium	No	3-hydroxy-3-(4-methylpent-3-en-1-yl)glutaryl-CoA acetate-lyase
Smeli	Alphaproteobacteria	Sinorhizobium meliloti 1021	SM_b21216	SM_b21216	transporter	ABC transporter for D-Glucosamine, ATPase component	MSALEIRNIRKRYGEVETLKGIDIALESGEFLVLLGSSGCGKSTLLNIIAGLAEPSGGDILIGERSVLGVHPKDRDIAMVFQSYALYPNLSVARNIGFGLEMRRVPQAEHDKAVRDTARLLQIENLLDRKPSQLSGGQRQRVAIGRALVRNPQVFLFDEPLSNLDAKLRMEMRTELKRLHQMLRTTVVYVTHDQIEAMTLATRIAVMRDGRIEQLAAPDEVYDRPATLYVAGFVGSPPMNILDAEMTANGLKIEGCEEVLPLPAAFNGAAWAGRRVKVGIRPEALRLAAGSEAQRLTASVEVVELTGPELVTTATVGSQRITACLPPRTAVGMGSAHAFTFDGTALHLFDPESGRSLRME	sp|Q7CS28|SMOE_AGRFC	49.025	Sulfoquinovosyl glycerol transport ATP-binding protein SmoE OS=Agrobacterium fabrum (strain C58 / ATCC 33970) OX=176299 GN=smoE PE=1 SV=2	No		K10112	msmX, msmK, malK, sugC, ggtA, msiK; multiple sugar transport system ATP-binding protein [EC:7.5.2.-]	Vague		GCF_000006965.1:WP_010975584.1	ABC transporter ATP-binding protein [Sinorhizobium meliloti]	Vague
Smeli	Alphaproteobacteria	Sinorhizobium meliloti 1021	SM_b21217	SM_b21217	enzyme	glucosamine kinase (EC 2.7.1.8)	MRPLAAIGNVNVDLILGPAEPWPKPGTEVIVDHDELRVGGCAGNNALAWDSLGVDYVIAANVGNDQFGTWLKEAFGERSRNWPVEAVGTTLSVGITHPDGERTFFTTRGHLPLFSFPEVHSMLDGNRLRGGYALLSGSFLTDALTLAYDALFDWADAHEIAVALDTGWPLDGWTETNRLRTLGWLKRCHCALFNEVETTTLTGLSDPAEAALSLKGEMPAEAIVVVKRGPHGALAIDRDGGTFSVPAPQVQVVDTIGAGDVFNAGFLAALAAEMPLEACLKTGVTIASEAISTLPRRYGKPLSAFLEESRR	sp|P77493|YDJH_ECOLI	29.412	Uncharacterized sugar kinase YdjH OS=Escherichia coli (strain K12) OX=83333 GN=ydjH PE=1 SV=2	Vague	The next best hit is annotated as ribokinase			Vague		GCF_000006965.1:WP_015456656.1	PfkB family carbohydrate kinase [Sinorhizobium meliloti]	Vague		EC:2.7.1.3 EC:2.7.1.187 EC:2.7.1.20	Low	No	ketohexokinase, acarbose 7-kinase, adenosine kinase
Smeli	Alphaproteobacteria	Sinorhizobium meliloti 1021	SM_b21646	SM_b21646	transporter	ABC transporter for D-Raffinose, permease component 2	MFRFLLVRIASAIPVLLVLSVVTFGIIQAPPGDYSDYIRSQLINQGGASFEEADAQAQAYRKEHGLDKPLPIQYVNWITGIVTRGDFGHSLYYNKPVADVVGERLPRTLALALVCHILASVIGIAFGIIAATRQYSWIDSLLSTVSFLGMTVPRFLMALIIVYILVFHFNVSEINSFHSARYGGAPWSWDKFVDLIKHVWPVVAIATFGGLAYNMRVMRGNLLDTLNAQYVETARAKGLSEGAVVMRHAVPNALHPLIMYQGVVLPYMLTGEIETAIIFALPTVGPAIVGSMWVGDVYVTATFMLVLSATLIVGNIIADMMLAALDPRVRMGGGVYA	sp|P42062|APPB_BACSU	34.226	Oligopeptide transport system permease protein AppB OS=Bacillus subtilis (strain 168) OX=224308 GN=appB PE=3 SV=2	No		K25097	agpB; alpha-galactoside transport system permease protein	Yes	raffinose is an alpha-galactoside	GCF_000006965.1:WP_003527990.1	ABC transporter permease [Sinorhizobium meliloti]	Vague
Smeli	Alphaproteobacteria	Sinorhizobium meliloti 1021	SM_b21648	SM_b21648	enzyme	Alpha-galactosidase (EC: 3.2.1.22)	MASFKIAIIGAGSIGFTKKLFTDILSVPELRDVEFALTDLSEHNLAMIKSILDRIVEANELPTRVTATTDRRKALEGARYIISCVRVGGLEAYADDIRIPLKYGVDQCVGDTICAGGILYGQRNIPVILDFCKDIREVAEPGAKFLNYANPMAMNTWAAIEYGKVDTVGLCHGVQHGAEQIAEILGARDGELDYICSGINHQTWFVDVRLNGRKVGKDELVAAFEAHPVFSKQEKLRIDVLKRFGVYSTESNGHLSEYLPWYRKRPDEISRWIDMSDWIHGETGGYLRYSTETRNWFETEYPRFLEEAGRPLETIRRSNEHASRILEALETGRVYRGHFNVKNNGVITNLPADAIIESPGFVDRFGINMVAGITLPEACAATCISSVNVQRMSVHAAIT…	sp|Q9X4Y0|AGAL_RHIME	100	Alpha-galactosidase OS=Rhizobium meliloti (strain 1021) OX=266834 GN=melA PE=3 SV=1	Yes		K07406	melA; alpha-galactosidase [EC:3.2.1.22]	Yes		GCF_000006965.1:WP_003527988.1	alpha-glucosidase/alpha-galactosidase [Sinorhizobium meliloti]	Close	Not sure alpha-glucosidase activity is likely	EC:3.2.1.22	Low	Yes
Smeli	Alphaproteobacteria	Sinorhizobium meliloti 1021	SMa0247	SMa0247	enzyme	2-dehydro-3-deoxy-D-arabinonate dehydratase, 2,4-dioxopentanoate forming	MSGGFLVSFEQALSAESIQPADASSAMLVGRVWSKTAGGPCPVLISEGEVFDLTPLAATISALLEIDGLVDALRDPSRFASLGSLDAFLRGEAGDLLAPADLQAVKAAGVTFADSMLERVIEEQAKGDPLRAQEIRGRLAPVLGDNLKGLVAGSDKAAEVKKLLQELGLWSQYLEVGIGPDAEIFTKAQPMSSVGCGAYIGIHPKSDWNNPEPEVVLAVTSKGKIVGATLGNDVNLRDFEGRSALLLSKAKDNNASCSIGPFIRLFDGAFTIEDVKQAEVSLVVDGKEGFKMTGISPMSAISRSPEDLVSQLLNDNHQYPDGVVFFLGTMFAPVKDRRGTGLGFTHEIGDRVEISTPRLGRLVNWVDHSDRCPKWSFGLGALMKNLAERGLLQAKREG		NA						Vague		GCF_000006965.1:WP_010967132.1	fumarylacetoacetate hydrolase family protein [Sinorhizobium meliloti]	Vague		EC:4.2.1.141	Low	No	2-dehydro-3-deoxy-D-arabinonate dehydratase (forming 2,5-dioxopentanoate)
Smeli	Alphaproteobacteria	Sinorhizobium meliloti 1021	SMc00832	SMc00832	enzyme	D-lactate dehydrogenase, FAD-linked subunit GlcD (EC 1.1.99.6)	MPETIGFLKPRQAVLDRRREIVADLADLLPEGGLISDERGLKPFETDAFIAYRRMPLAVVLPETTEHVAAVLKYCSRYGIPIVPRGAGTSLSGGAIPQEDAIVVGLSKMSRTLDIDLFNRTATVQAGVTNLNISDAVSADGFFYAPDPSSQLACTIGGNIGMNSGGAHCLKYGVTTNNLLGVKMVLFDGTVIELGGKALDAPGYDLLGLVCGSEGQLGIVTEATVRLIAKPEGARPVLFGFASSESAGSCVADIIGSGIIPVAIEFMDRPAIEICEAFAQAGYPLDVEALLIVEVEGSEAEMDATLAGIIEIARRHGVMTIRESQSALEAALIWKGRKSAFGATGRIADYICMDGTVPLSQLSHVLRRTGEIVAGYGLRVANVFHAGDGNMHPLILYNI…	sp|P0AEP9|GLCD_ECOLI	47.619	Glycolate oxidase subunit GlcD OS=Escherichia coli (strain K12) OX=83333 GN=glcD PE=1 SV=1	Yes	Function: “Is also able to oxidize D-lactate ((R)-lactate) with a similar rate”	K00104	glcD; glycolate dehydrogenase FAD-linked subunit [EC:1.1.99.14]	No		GCF_000006965.1:WP_010968808.1	FAD-linked oxidase C-terminal domain-containing protein [Sinorhizobium meliloti]	Vague		EC:1.1.99.14	High	Close	glycolate dehydrogenase, “also acts on (R)-lactate” = D-lactate
Smeli	Alphaproteobacteria	Sinorhizobium meliloti 1021	SMc04251	SMc04251	transporter	dctP-like component of a pyruvate transporter, with SMc04248 and SMc04249	MDRRSFIKHASIGGLGAAAASALAAPAIAQTNPKVTWRLTSSFPKSLDTIYGGAEVLSKYVSEATDGNFQIQVFAAGEIVPGLQAADAAAAGTVEACHTVAYYYWGKDPTWALGAAVPFALNARGMNAWHYHGGGIDLFNEFLGTQGLVGYPGGNTGVQMGGWFRKEIKTVADMKGLKMRVGGFAGKVMERLGVVPQQLAGGDIYPALEKGTIDAAEWVGPYDDEKLGFYKVAPYYYYPGWWEGGPTVHAMFNKAAFDGLPKAYQSLLRTACQATDANMLQKYDYLNPSAIKRLVAAGAKLSPFSPEILSACFDESNKVYAEMEASNAPFKKIWESIKAFRAEYFLNAQIAEYNYDTFMMIQQRNGKI	sp|Q3J1R2|TAKP_CERS4	79.348	Alpha-keto acid-binding periplasmic protein TakP OS=Cereibacter sphaeroides (strain ATCC 17023 / DSM 158 / JCM 6121 / CCUG 31486 / LMG 2827 / NBRC 12203 / NCIMB 8253 / ATH 2.4.1.) OX=272943 GN=takP PE=1 SV=1	Yes	Function field mentions pyruvate			Vague		GCF_000006965.1:WP_010969563.1	TRAP transporter substrate-binding protein [Sinorhizobium meliloti]	Vague
WCS417	Gammaproteobacteria	Pseudomonas simiae WCS417	GFF1302	PS417_06615	transporter	Transporter for branched-chain amino acids (and probably others, given phenotypes of close homologs)	MNKATKQISKLFAAMVLAGVAGHSFAADTIKIGIAGPKTGPVTQYGDMQFMGAKQAIADINAKGGVDGKMLEAKEYDDACDPKQAVAVANKVVNDGVKFVVGHLCSSSTQPASDIYEDEGVIMITPAATSPEITARGYKLIFRTIGLDSAQGPAAGNYIADHVKPKIVAVLHDKQQYGEGIATAVKQTLEKKGTKVAVFEGLNAGDKDFSSIIQKLKQANVDFVYYGGYHPELGLILRQAKEKGLNAKFMGPEGVGNDSISQIAQGASEGLLVTLPKSFDTDPANKAIVEEFAKNKQDPTGPFVFPAYSAIEVIAGGIKAAKSEDTAKVAEAIHAGTFKTPTGDLSFDAKGDLKDFKFVVYEWHFGKPKTEVSPQ	sp|P21175|BRAC_PSEAE	68.817	Leucine-, isoleucine-, valine-, threonine-, and alanine-binding protein OS=Pseudomonas aeruginosa (strain ATCC 15692 / DSM 22644 / CIP 104116 / JCM 14847 / LMG 12228 / 1C / PRS 101 / PAO1) OX=208964 GN=braC PE=1 SV=2	Yes		K01999	livK; branched-chain amino acid transport system substrate-binding protein	Yes		GCF_000698265.1:WP_010212361.1	branched-chain amino acid ABC transporter substrate-binding protein [Pseudomonas]	Yes
WCS417	Gammaproteobacteria	Pseudomonas simiae WCS417	GFF1318	PS417_06700	enzyme	3-oxoadipate CoA-transferase (EC 2.8.3.6)	MAEILALRDAVKQFVNDGDTVALEGFTHLIPTAAGHEIIRQGKKDLTLVRMTPDLIYDQLIGAGCARKLIFSWGGNPGVGSLHRLRDAVEKQWPQPLEIEEHSHADLANAYVAGASGLPFAVLRAYAGSDLPKVNPLIKTVTCPFTGEVLAAVPSVRPDVTVIHAQKADRKGNVLLWGILGVQKEAALAAKRCIVTVEEIVDDLNAPMNSCVLPTWALTAVCHVPGGAHPSYAHGYNERDNRFYQAWDPIARDRGTFTAWINEYIHGTADFTEFQAKLATAQEAK	sp|Q8VPF3|CATI_PSEKB	88.652	3-oxoadipate CoA-transferase subunit A OS=Pseudomonas knackmussii (strain DSM 6978 / LMG 23759 / B13) OX=1301098 GN=catI PE=1 SV=1	Yes		K01039	gctA; glutaconate CoA-transferase, subunit A [EC:2.8.3.12]	No		GCF_000698265.1:WP_010212331.1	CoA transferase subunit A [Pseudomonas]	Vague		EC:2.8.3.6	High	Yes
WCS417	Gammaproteobacteria	Pseudomonas simiae WCS417	GFF1732	PS417_08810	enzyme	glyoxylate carboligase (purines are catabolized via urate, allantoin, glyoxylate)	MSKMRAIEAAVLVMRREGVDTAFGIPGAAINPLYSALQKVGGIDHVLARHVEGASHMAEGYTRTKAGNIGVCIGTSGPAGTDMVTGLYSASADSIPILCITGQAPRARMHKEDFQAVDITSIVKPVTKWATTVLEPGQVPYAFQKAFYEMRSGRPGPVLIDLPFDVQMAEIEFDIDAYQPLPLAKPLATRVQVEKALALLDKAERPLLVSGGGVINADASELLVEFAELTGIPVIPTLMGWGTIPDDHPQMVGMVGLQTSHRYGNATMLKSDVVLGIGNRWANRHTGSVEVYTEGRTFIHVDIEPTQIGRVFTPDLGIVSDAGSALTMFIEVAREWKAAGKLKDRSAWLNDCQQRKATLHRKTHFDNVPVKPQRVYEEMNQVFGKDTCYVSTIGLSQIA…	sp|P0AEP8|GCL_ECO57	72.712	Glyoxylate carboligase OS=Escherichia coli O157:H7 OX=83334 GN=gcl PE=3 SV=2	Yes		K01608	gcl; tartronate-semialdehyde synthase [EC:4.1.1.47]	Yes		GCF_000698265.1:WP_038453017.1	glyoxylate carboligase [Pseudomonas]	Yes		EC:4.1.1.47	High	Yes	glyoxylate carboligase
WCS417	Gammaproteobacteria	Pseudomonas simiae WCS417	GFF1742	PS417_08860	transporter	small component of pyruvate transporter (yjcH-like)	MNDSIYLSIQNSPRFKELVRKRERFAWILSAIMLGLYSAFILLIAYGPQLLGAKISPGSSITWGIPLGVGLIVSAFVLTGIYVRRANGEFDDLNNAILKEAAQ	sp|P0AF55|YJCH_SHIFL	59.406	Inner membrane protein YjcH OS=Shigella flexneri OX=623 GN=yjcH PE=3 SV=1	Vague	Other hit is also vague			Vague		GCF_000698265.1:WP_010211745.1	DUF485 domain-containing protein [Pseudomonas]	Vague
WCS417	Gammaproteobacteria	Pseudomonas simiae WCS417	GFF2157	PS417_11005	transporter	arabinose transporter (strong conserved specific phenotype)	MSQELRLIRRITLKLIPFLILLYLIAYVDRSAVGFAKLHMGADVGIGDAAYGLGAGLFFIGYFLFEIPSNLMLDRFGARRWFARIMITWGAITIGMAFVQGPHSFYVMRFLLGAAEAGFFPGVLYYITQWFPVRHRGKILGLFILSQPIAMMITGPVSGGLLGMDGMLGLHGWQWLFIVIGTPAILLTWPVLRYLPDGPKQVTWMSEDEKAWLTGELAKDLQAYGQTRHGNPLHALKDKRVLLLALFYLPVTLSIYGLGLWLPTLIKQFGGSDLTTGFISAVPYIFGIIGLLIIPRSSDRLNDRYGHLAVLYVLGAIGLFFSAWLTVPLLQMAALCLAAFAMFSCTAVFWTLPGRFFAGASAAAGIALINSVGNLGGYIGPFVIGALKEYTGNLASGLY…	sp|P0DPR4|ABAQ_ACIBT	72	Quinolone resistance transporter OS=Acinetobacter baumannii (strain ATCC 17978 / CIP 53.77 / LMG 1025 / NCDC KC755 / 5377) OX=400667 GN=abaQ PE=1 SV=1	No	Odd that an uptake transporter is so similar to an efflux transporter; but more distant homologs (RL0996, Q88FY6) are thought to be uptake transporters. The annotation of both GFF215 and ABAQ are inferred from growth phenotypes and one of them may be incorrect.			Vague		GCF_000698265.1:WP_010211219.1	MFS transporter [Pseudomonas]	Vague
WCS417	Gammaproteobacteria	Pseudomonas simiae WCS417	GFF2462	PS417_12555	enzyme	2-dehydro-6-phosphogluconate reductase (variably important for glucose utilization, with a variety of N sources)	MKKSVVLYKKLSAPLMARLHEQTDVTLIEALDDTGLAKLRDALPGAHGLLGASLRLDAKLLDLAPQLEAVASVSVGVDNYDIDYLTARGILLSNTPDVLTETTADTGFALILATARRVVELADMVRAGQWNKNIGPAHFGSDVHGKTLGIIGMGRIGEALAQRGHFGFGMPVIYHSHSPKPAVEARFGAQYRSLNDLLQQADFVCLTLPLTAETEKLIGAEQFARMGPETIFINISRGKVVDEAALVEALQQRTIRAAGLDVFEKEPLDHSSPLLRLNNVVATPHIGSATHETREAMAKCAVDNLLQALAGEKPNNLVNANAWNR	sp|B7LTG7|GHRB_ESCF3	58.934	Glyoxylate/hydroxypyruvate reductase B OS=Escherichia fergusonii (strain ATCC 35469 / DSM 13698 / CCUG 18766 / IAM 14443 / JCM 21226 / LMG 7866 / NBRC 102419 / NCTC 12128 / CDC 0568-73) OX=585054 GN=ghrB PE=3 SV=1	No		K00090	ghrB; glyoxylate/hydroxypyruvate/2-ketogluconate reductase [EC:1.1.1.79 1.1.1.81 1.1.1.215]	No	K00032 is correct	GCF_000698265.1:WP_010210813.1	D-glycerate dehydrogenase [Pseudomonas]	No		EC:1.1.1.81 EC:1.1.1.79 EC:1.1.1.215	High	Close	hydroxypyruvate reductase, glyoxylate reductase (both dubious), 2-ketogluconate reductase (correct)
WCS417	Gammaproteobacteria	Pseudomonas simiae WCS417	GFF335	PS417_01705	enzyme	Formiminoglutamic iminohydrolase (EC 3.5.3.13)	MSAFFAERALLPNGWANDVRLEVSADGLLIKVEANARAEGAERLRGPVLAGMPNLHSHAFQRAMAGLAEVAGNPNDSFWTWRDLMYRMVGKINPDQLQVIARQLYIEMLKAGYTSVAEFHYVHHDISGQPYADRTELSRQISQAAARSGIGLTLVPVLYTHSGFGGQAPNEGQRRFINSTEHYLDLQAQLKPILAAQPAQQLGLCFHSLRAVTPEQINAVLAASDKACPVHIHIAEQQKEVDDCLAWSGKRPLQWLYDNVEVDERWCLVHATHADADEVARMAKSRAIAGLCLTTEANLGDGIFPAVDFLAQGGRMGIGSDSHVSLSVVEELRWLEYGQRLRDQRRNRLYRGDQPMVGRTLFDAALDGGAQALGQPIGRLEVGKRADWIVLDGNDPYLA…	sp|Q9HU77|HUTF_PSEAE	75.991	Formimidoylglutamate deiminase OS=Pseudomonas aeruginosa (strain ATCC 15692 / DSM 22644 / CIP 104116 / JCM 14847 / LMG 12228 / 1C / PRS 101 / PAO1) OX=208964 GN=hutF PE=1 SV=1	Yes		K05603	hutF; formimidoylglutamate deiminase [EC:3.5.3.13]	Yes		GCF_000698265.1:WP_010213850.1	formimidoylglutamate deiminase [Pseudomonas]	Yes		EC:3.5.4.3	Low	No	guanine deaminase
WCS417	Gammaproteobacteria	Pseudomonas simiae WCS417	GFF3412	PS417_17460	enzyme	ethanol dehydrogenase (and maybe other primary alcohols)	MQAFVLVGSLSLSAVTFAAAEPAKPTRTVTWEDIANDHLTTQDVLQYGMGTNAQRWSPLAQVNDKNVFKLTPAWSYSFGDEKQRGQESQAIVSDGVVYVTGSYSRVFALDAKTGKRLWTYNHRLPDNIRPCCDVVNRGAAIFGDKIYFGTLDARLIALDKNTGKVVWNKKFGDHAAGYTLTGAPVLIKDKVSGKVLLIHGSSGDEFGVVGQLFARDPDTGEEVWMRPFVEGHMGRLNGKDSTPTGDVKAPSWPDDPTTETGKVEAWSHGGGAPWQSASFDAETNTIIVGAGNPGPWNTWARTAKDGNPHDFDSLYTSGQVGVDPSTGEVKWFYQHTPNDAWDFSGNNELVLFDYKDKDGKVVKATGHADRNGFFYVVDRNNGKLQNAFPFVDNITWASH…	sp|A8R3S4|QEDH_PSEPU	89.756	Quinoprotein ethanol dehydrogenase OS=Pseudomonas putida OX=303 GN=qedA PE=1 SV=1	Yes		K00114	exaA; alcohol dehydrogenase (cytochrome c) [EC:1.1.2.8]	Yes		GCF_000698265.1:WP_021492845.1	quinoprotein ethanol dehydrogenase [Pseudomonas]	Yes		EC:1.1.2.8	High	Yes	alcohol dehydrogenase (cytochrome c)
WCS417	Gammaproteobacteria	Pseudomonas simiae WCS417	GFF3796	PS417_19435	enzyme	urate hydroxylase	MEAHLMEWLNLSVRWVHMITGVAWIGASFYFVWLENNLNRVNPKSGLAGDLWAIHGGGIYHLEKYKLAPPTMPDNLHWFKWEAYFTWMSGIALLCVVFYWNPTLYLLAPGSSLSGPEGVLLGIGSLFAGWFIYSFLCDSALGKRPALLSFILFVLLIAAAYGFSKVFSGRGAYLHVGAVIGTIMVGNVFRIIMPAQRALVAAIAENRTPDPALPAKGLLRSRHNNYFTLPVLFIMISNHFPSTYGSQYNWLILAGIAVAAVLVRHYFNTRHNSQKYAWTLPVGALAMICLAYVTGPKPVSTAPEVAKAPAAIEYQPLPETALGGGLKPAAPAAPAAPAAEPAPAQATTDFGQIHSVIEQRCTVCHSAKPTSPLFSTAPAGVMFDTPAQIQQQAARIQAQ…		NA						Vague		GCF_000698265.1:WP_010208833.1	urate hydroxylase PuuD [Pseudomonas]	Yes		EC:7.1.1.8	Low	No	quinol--cytochrome-c reductase
WCS417	Gammaproteobacteria	Pseudomonas simiae WCS417	GFF4198	PS417_21500	transporter	succinate transporter (and likely other C4 dicarboxylates as well)	MTTRQPIYKSLYFQVIVAIVIGILLGHFYPQTGVALKPLGDGFIKLIKMVIAPIIFCTVVSGIAGMQSMKSVGKTGGYALLYFEIVSTVALLIGLIVVNVVQPGNGMHIDVATLDASKVAAYVTAGKDQSIVGFILNVIPNTIVGAFANGDILQVLMFSVIFGFALHRLGAYGKPVLDFIDRFAHVMFNIINMIMKLAPIGALGAMAFTIGAYGVGSLVQLGQLMICFYITCLLFVLVVLGGICRAHGFSVIKLIRYIREELLIVLGTSSSESALPRMLIKMERLGAKKSVVGLVIPTGYSFNLDGTSIYLTMAAVFIAQATDTHMDITHQITLLLVLLLSSKGAAGVTGSGFIVLAATLSAVGHLPVAGLALILGIDRFMSEARALTNLVGNAVATIV…	sp|C3K0P6|DCTA_PSEFS	99.323	C4-dicarboxylate transport protein OS=Pseudomonas fluorescens (strain SBW25) OX=216595 GN=dctA PE=3 SV=1	Yes		K11103	dctA; aerobic C4-dicarboxylate transport protein	Yes		GCF_000698265.1:WP_010208364.1	dicarboxylate/amino acid:cation symporter [Pseudomonas]	Close	Doubt amino acids are substrates
WCS417	Gammaproteobacteria	Pseudomonas simiae WCS417	GFF5296	PS417_27115	transporter	putrescine transporter	MAVASGAYKKALEGDQTPKKVLVKIDRVTKKFDETIAVDDVSLEIKKGEIFALLGGSGSGKSTLLRMLAGFERPTEGRIYLDGEDITDMPPYERPINMMFQSYALFPHMTVAQNIAFGLQQDKIPKAEIDARVAEMLKLVQMSQYAKRKPHQLSGGQRQRVALARSLAKRPKLLLLDEPMGALDKKLRSQMQLELVEIIERVGVTCVMVTHDQEEAMTMAERIAIMHLGWIAQIGSPIDIYETPTSRLVCEFIGNVNIFDTQVVDDAEGHAVLKCPDLDRDIYVGYGIATSVEDKSVTYAIRPEKLLVTTEMPTCEHNWSSGKVHDIAYLGGHSVFYVELPSGKLVQSFVANAERRGQRPTWGDQVYVWWEDDSGVVLRS	sp|P31134|POTG_ECOLI	63.687	Putrescine transport ATP-binding protein PotG OS=Escherichia coli (strain K12) OX=83333 GN=potG PE=1 SV=2	Yes		K11076	potG, spuF; putrescine transport system ATP-binding protein [EC:7.6.2.16]	Yes		GCF_000698265.1:WP_010207336.1	polyamine ABC transporter ATP-binding protein [Pseudomonas]	Yes
WCS417	Gammaproteobacteria	Pseudomonas simiae WCS417	GFF532	PS417_02710	enzyme	Ni insertion into urease	MLVIHRRIAPQALWAAELLLNFEARSKSRLRCFSADGEDVGLFLERGQPPLHDGEFLQAEDGRVVRVCARPEHLLHVTCSSAFELTRAAYHLGNRHVALQVGDGWLRLLDDYVLKAMLEQLGAQTATIEAPFQPEHGAYGGGHHHSRHGDEDFNYPPKLHQFGVRL	sp|C3K4L5|UREE_PSEFS	98.193	Urease accessory protein UreE OS=Pseudomonas fluorescens (strain SBW25) OX=216595 GN=ureE PE=3 SV=1	Yes		K03187	ureE; urease accessory protein	Yes		GCF_000698265.1:WP_010213559.1	urease accessory protein UreE [Pseudomonas]	Yes		EC:4.1.99.20	Low	No	3-amino-4-hydroxybenzoate synthase
WCS417	Gammaproteobacteria	Pseudomonas simiae WCS417	GFF799	PS417_04060	transporter	dipeptide transporter	MFSFIARRLGLLIPTFFGITLLTFALIRMIPGDPVEVMMGERRVDPEMHAQAMERLGLNKPLYAQYLDYVGKLAQGDLGESLRTRTSVWTEFTALFPATLELSMAALLFAGILGLLAGVIAALKRGSLFDHGVMGISLAGYSMPIFWWGLILIMFFSVSLGWTPVSGRIDLLYDIEPRTGFMLIDTLLADEPDAFWDALHHLILPAIVLGTIPLAVIARMTRSSMLEVLREDYIRTAKAKGLSPARVVFVHGLRNALIPVLTVVGLQVGTLLAGAVLTETIFSWPGIGKWLIEAIGARDYPVVQNGILLIACLVILVNFVVDILYGFANPRIRHQR	sp|A0A0H2ZGW7|DPPB_PSEAB	86.905	Di/tripeptide transport system permease protein DppB OS=Pseudomonas aeruginosa (strain UCBPP-PA14) OX=208963 GN=dppB PE=1 SV=1	Yes		K12369	dppB; dipeptide transport system permease protein	Yes		GCF_000698265.1:WP_003171721.1	ABC transporter permease subunit [Pseudomonas]	Vague
